# Supplementary material for: The Monty Hall problem revisited: Autonomic arousal in an inverted version of the game
Source: PLoS One. 2018 Mar 26;13(3):e0192542. doi: 10.1371/journal.pone.0192542 (PMC5868764; doi:10.1371/journal.pone.0192542)
Supplement: S1 Table — (XLSX) [file pone.0192542.s001.xlsx]

## Sheet: Plan1
Table S1. Crude data of skin conductance of each participant in the classical version of the MHG.
Time [s]	P1	P3	P5	P7	P9	P11	P13	P15	P17	P19	P21	P23	P25	P27	P29	P31	P33	P35	P37	P39	P41	P43	P45	P47	P49	P51	P53	P55	P57	P59
0	0.8732	2.381	0.7075	0.9939	1.5795	2.5732	1.6237	7.5454	0.741954	2.826	1.1026	1.8645	0.738074	1.4527	0.943396	0.971359	2.4633	1.1107	1.7082	0.942405	8.1714	7.2878	3.0948	5.6357	1.7587	3.4086	2.9303	2.2498	4.0338	4.664
0.1	0.8715	2.3896	0.7068	0.9925	1.5779	2.5668	1.6185	7.5547	0.742038	2.8405	1.1037	1.8548	0.73965	1.455	0.941681	0.969903	2.4582	1.113	1.7153	0.941855	8.161	7.279	3.094	5.621	1.7531	3.4007	2.9244	2.2446	4.0286	4.6594
0.2	0.8748	2.4095	0.71	0.995	1.5792	2.5584	1.6136	7.5985	0.741954	2.8457	1.1058	1.8631	0.743466	1.4544	0.95163	0.968204	2.4556	1.1137	1.7163	0.944493	8.1638	7.2854	3.0842	5.6069	1.7577	3.3774	2.9052	2.2998	4.0248	4.6569
0.3	0.8751	2.4124	0.7118	0.9956	1.5789	2.5567	1.6098	7.5934	0.744379	2.8549	1.1042	1.8568	0.745872	1.454	0.953688	0.968204	2.4519	1.1134	1.7201	0.945043	8.1951	7.2735	3.0704	5.6183	1.755	3.4194	2.8909	2.2941	4.0206	4.6531
0.4	0.8747	2.4225	0.7126	0.9945	1.5761	2.5518	1.6081	7.6265	0.742957	2.854	1.1025	1.8566	0.745209	1.453	0.955746	0.971602	2.4507	1.1139	1.7243	0.947021	8.1941	7.2957	3.0642	5.6145	1.7511	3.3786	2.8762	2.2719	4.0161	4.6477
0.5	0.8737	2.4269	0.7119	0.9928	1.5776	2.5625	1.604	7.6512	0.743292	2.8616	1.1045	1.8624	0.747698	1.4566	0.958148	0.973544	2.4484	1.115	1.7224	0.947351	8.1932	7.2695	3.0599	5.6112	1.756	3.3507	2.8526	2.3064	4.0116	4.6443
0.6	0.8752	2.4376	0.7147	0.9947	1.5805	2.5565	1.5968	7.6855	0.745716	2.863	1.1014	1.853	0.746204	1.4562	0.95506	0.967233	2.4486	1.1136	1.7201	0.947351	8.1846	7.2711	3.0532	5.6123	1.7592	3.4058	2.8405	2.2755	4.0075	4.6398
0.7	0.8732	2.4376	0.7126	0.9925	1.577	2.561	1.5923	7.6881	0.746301	2.8704	1.1029	1.856	0.746536	1.4572	0.95163	0.971602	2.4525	1.1131	1.7224	0.94878	8.2132	7.2648	3.0406	5.6107	1.752	3.3677	2.8288	2.3079	4.004	4.6356
0.8	0.8739	2.4437	0.7126	0.9922	1.5712	2.5682	1.5898	7.7002	0.743626	2.8704	1.0998	1.8563	0.749606	1.4534	0.953345	0.971602	2.46	1.1153	1.7256	0.949439	8.2362	7.2435	3.0366	5.6085	1.748	3.4245	2.8124	2.307	4.0003	4.6343
0.9	0.8777	2.4484	0.7156	0.9941	1.5737	2.5827	1.5862	7.7158	0.746301	2.886	1.1001	1.8633	0.749357	1.4529	0.95506	0.971117	2.4682	1.1137	1.7253	0.952847	8.2084	7.3077	3.0334	5.6112	1.7516	3.4174	2.7943	2.2691	3.9961	4.6381
1	0.8785	2.4578	0.7165	0.9935	1.5725	2.6102	1.5792	7.7219	0.747722	2.8952	1.0947	1.8593	0.750353	1.4523	0.954374	0.970388	2.4815	1.1139	1.727	0.946582	8.24	7.31	3.0255	5.6058	1.7516	3.4183	2.784	2.3253	3.9924	4.6456
1.1	0.8795	2.4667	0.7153	0.9919	1.5714	2.6411	1.5738	7.7271	0.747388	2.8963	1.0993	1.8657	0.751929	1.4496	0.955403	0.970388	2.4863	1.1121	1.7245	0.946692	8.2573	7.2949	3.0235	5.6177	1.7516	3.4419	2.7674	2.2657	3.9886	4.6653
1.2	0.8791	2.4686	0.7176	0.9906	1.5732	2.6813	1.5715	7.7149	0.746301	2.8982	1.0957	1.8577	0.753671	1.447	0.950257	0.971117	2.4971	1.1142	1.7236	0.94933	8.2275	7.2957	3.0302	5.6177	1.753	3.3929	2.7663	2.2424	3.9845	4.699
1.3	0.8791	2.4789	0.7183	0.9924	1.5733	2.7235	1.575	7.7549	0.747304	2.8975	1.0994	1.8599	0.752261	1.4492	0.953345	0.971359	2.5085	1.1126	1.7283	0.947351	8.2084	7.3252	3.0253	5.6232	1.7566	3.4027	2.767	2.173	3.9807	4.7494
1.4	0.8804	2.4843	0.7188	0.9949	1.5736	2.7645	1.5724	7.7166	0.746803	2.8968	1.0965	1.864	0.755248	1.4507	0.954031	0.96966	2.5115	1.1141	1.731	0.946472	8.1648	7.314	3.0327	5.633	1.757	3.4217	2.7534	2.0975	3.979	4.8198
1.5	0.8788	2.4957	0.7169	0.994	1.574	2.8088	1.5737	7.7123	0.74488	2.9102	1.0942	1.8669	0.753671	1.4499	0.957804	0.966505	2.5157	1.1126	1.7307	0.945922	8.2333	7.3156	3.0351	5.6281	1.7529	3.4313	2.7505	1.9793	3.9811	4.8965
1.6	0.8761	2.5017	0.7167	0.9945	1.5734	2.8286	1.5733	7.7045	0.745382	2.9074	1.0934	1.8575	0.754916	1.4532	0.953002	0.968932	2.5181	1.1146	1.7345	0.945922	8.266	7.3445	3.0428	5.6259	1.7469	3.4285	2.7435	1.9688	3.9924	4.979
1.7	0.8759	2.5073	0.718	0.9973	1.5708	2.8837	1.5771	7.7201	0.748224	2.909	1.0909	1.8551	0.750187	1.4475	0.954031	0.970388	2.5177	1.1178	1.7332	0.946252	8.2228	7.3711	3.05	5.6215	1.751	3.4385	2.7355	1.9633	4.0168	5.063
1.8	0.8795	2.5145	0.719	0.9967	1.5698	2.9248	1.5809	7.7192	0.744211	2.909	1.0921	1.8559	0.749938	1.4456	0.951973	0.968204	2.5268	1.1136	1.7368	0.947241	8.2027	7.4092	3.049	5.634	1.7543	3.4373	2.7353	1.8936	4.0586	5.1379
1.9	0.8786	2.526	0.7212	0.9985	1.5767	2.9777	1.5859	7.7253	0.745047	2.9123	1.092	1.8624	0.751763	1.4429	0.950257	0.967476	2.5264	1.1137	1.7399	0.944933	8.2208	7.4583	3.0542	5.634	1.7514	3.4322	2.7298	1.8661	4.1194	5.1972
2	0.8792	2.5258	0.7177	0.9996	1.5821	2.992	1.5894	7.695	0.747973	2.9135	1.0906	1.8652	0.749606	1.4409	0.95163	0.969417	2.5349	1.1143	1.7444	0.946582	8.2563	7.4963	3.055	5.6275	1.7526	3.3945	2.73	1.8956	4.1959	5.2457
2.1	0.8773	2.5294	0.7191	1.002	1.5884	3.0228	1.5939	7.7106	0.748057	2.9168	1.0938	1.8881	0.747117	1.4415	0.957461	0.96699	2.5455	1.1149	1.7432	0.945043	8.2429	7.5121	3.0654	5.6286	1.7572	3.4171	2.7226	1.8814	4.2811	5.2838
2.2	0.879	2.5329	0.7202	1.0019	1.6001	3.0632	1.5988	7.708	0.746719	2.917	1.0887	1.9067	0.746453	1.4418	0.95163	0.968447	2.5586	1.1173	1.7479	0.947791	8.2084	7.5748	3.0682	5.627	1.754	3.4637	2.721	1.8687	4.3643	5.3137
2.3	0.8813	2.5343	0.7235	1.0031	1.6043	3.0978	1.6009	7.7262	0.7514	2.9059	1.0888	1.9358	0.744711	1.4403	0.957804	0.96966	2.5734	1.1158	1.753	0.946142	8.2266	7.6095	3.0757	5.6232	1.7597	3.4098	2.7298	1.8599	4.4401	5.3404
2.4	0.8822	2.5406	0.7227	1.0039	1.6137	3.1235	1.6072	7.6942	0.754242	2.9043	1.0917	1.9668	0.7472	1.4396	0.960206	0.967961	2.5829	1.1169	1.755	0.947681	8.2342	7.6684	3.0764	5.6145	1.7655	3.4205	2.7292	1.8833	4.5064	5.3688
2.5	0.8844	2.5461	0.722	1.0063	1.6243	3.1209	1.6118	7.7192	0.75792	2.9038	1.0894	1.9976	0.748693	1.4379	0.95163	0.968932	2.5987	1.1188	1.7546	0.94812	8.2419	7.7028	3.088	5.6183	1.7775	3.468	2.7254	1.897	4.5606	5.3933
2.6	0.8823	2.5508	0.7226	1.0078	1.6333	3.1623	1.6181	7.7166	0.763437	2.9012	1.0889	2.0221	0.749108	1.4432	0.955746	0.969175	2.6087	1.1175	1.7523	0.946362	8.2285	7.7418	3.0885	5.6379	1.779	3.4462	2.7371	1.9299	4.6024	5.4159
2.7	0.8863	2.5553	0.726	1.0098	1.643	3.175	1.6273	7.7418	0.765443	2.8977	1.0903	2.0519	0.745209	1.4469	0.963979	0.969903	2.6141	1.1183	1.7544	0.944713	8.2103	7.7979	3.086	5.6324	1.7872	3.4265	2.7499	1.9809	4.6335	5.435
2.8	0.8905	2.5627	0.727	1.0118	1.6495	3.1922	1.6361	7.7637	0.768369	2.9017	1.0901	2.0752	0.747449	1.4522	0.958148	0.971602	2.6162	1.1202	1.7563	0.945812	8.217	7.8324	3.0928	5.6471	1.7953	3.4605	2.7855	2.0056	4.6523	5.4506
2.9	0.8925	2.5643	0.7251	1.0117	1.654	3.1896	1.64	7.768	0.772549	2.9043	1.087	2.0889	0.746038	1.4525	0.956775	0.968689	2.6179	1.1234	1.7605	0.949879	8.2008	7.884	3.0996	5.6439	1.7981	3.4999	2.8009	2.0095	4.6615	5.4584
3	0.8926	2.5701	0.7267	1.0135	1.6608	3.2006	1.6458	7.7891	0.774555	2.9067	1.0885	2.1154	0.746453	1.46	0.969811	0.969175	2.62	1.1239	1.7612	0.952187	8.2189	7.884	3.0943	5.6564	1.8081	3.4784	2.8359	2.0145	4.6628	5.4578
3.1	0.8951	2.5757	0.7296	1.011	1.6637	3.227	1.648	7.768	0.779487	2.9116	1.0889	2.1221	0.742969	1.4616	0.965352	0.96966	2.6223	1.1218	1.7594	0.951308	8.2314	7.9173	3.1006	5.6811	1.8139	3.4367	2.8593	2.0215	4.6565	5.448
3.2	0.8926	2.5823	0.7299	1.0105	1.6669	3.2238	1.6549	7.82	0.779236	2.9055	1.0892	2.1154	0.747947	1.4629	0.960549	0.971602	2.6228	1.1248	1.7562	0.952957	8.2544	7.9254	3.1113	5.7027	1.8153	3.4339	2.8877	2.0325	4.6435	5.4314
3.3	0.8978	2.5974	0.7317	1.0151	1.6675	3.2402	1.6571	7.7926	0.781911	2.913	1.0898	2.1261	0.748859	1.4652	0.968096	0.970874	2.6177	1.1257	1.755	0.953177	8.2323	7.9489	3.1271	5.7127	1.8169	3.4996	2.9095	1.9956	4.6244	5.4113
3.4	0.8996	2.6056	0.7343	1.0124	1.6682	3.214	1.6571	7.7997	0.781911	2.918	1.0942	2.1272	0.749938	1.471	0.963636	0.969903	2.616	1.1263	1.7566	0.953836	8.2122	7.9408	3.1301	5.7216	1.8145	3.4822	2.9263	2.0085	4.5975	5.3861
3.5	0.8998	2.6045	0.736	1.0118	1.6715	3.2453	1.6529	7.7944	0.782162	2.921	1.0919	2.123	0.750933	1.4712	0.96741	0.973786	2.6121	1.1295	1.758	0.954825	8.2266	7.9535	3.1427	5.7288	1.819	3.5239	2.9391	2	4.5663	5.3576
3.6	0.8994	2.6098	0.7374	1.0118	1.6698	3.2397	1.6541	7.8359	0.785255	2.9213	1.091	2.1179	0.746785	1.4803	0.95952	0.971359	2.606	1.1311	1.7529	0.956914	8.24	7.9753	3.1569	5.7338	1.8204	3.5233	2.9486	2.0614	4.5322	5.3263
3.7	0.8987	2.6127	0.7368	1.0122	1.6685	3.2538	1.6523	7.8332	0.787261	2.9215	1.0911	2.1238	0.746868	1.484	0.95952	0.968689	2.6035	1.129	1.7537	0.953396	8.2775	7.9854	3.1688	5.7422	1.817	3.5624	2.957	2.1017	4.4964	5.2932
3.8	0.9011	2.6116	0.738	1.0123	1.6652	3.2296	1.6514	7.8359	0.78818	2.9263	1.0906	2.1113	0.74637	1.4863	0.968782	0.96966	2.5972	1.1298	1.7516	0.958013	8.2583	7.9991	3.1672	5.7433	1.8219	3.4663	2.9551	2.1013	4.4602	5.256
3.9	0.9015	2.6129	0.74	1.0119	1.6646	3.2568	1.6494	7.8466	0.788765	2.9253	1.0902	2.1099	0.754418	1.4927	0.962264	0.967476	2.5943	1.1294	1.748	0.960871	8.2717	7.9899	3.175	5.7562	1.8187	3.5081	2.9608	2.0805	4.4248	5.2172
4	0.9008	2.6211	0.7386	1.0106	1.6615	3.2697	1.6466	7.843	0.787344	2.9241	1.0913	2.105	0.756741	1.4943	0.963979	0.972816	2.5804	1.1277	1.7444	0.959332	8.2362	7.968	3.1815	5.7495	1.8129	3.5372	2.9666	2.0975	4.3913	5.1783
4.1	0.9032	2.6209	0.7408	1.01	1.6619	3.2743	1.6427	7.8085	0.788598	2.9282	1.0875	2.103	0.755828	1.5	0.960206	0.974272	2.5759	1.1295	1.7429	0.957683	8.2544	8.0027	3.1862	5.7697	1.8066	3.5594	2.9726	2.0624	4.3589	5.1426
4.2	0.9036	2.6236	0.7426	1.0105	1.6574	3.2775	1.6445	7.8403	0.787929	2.9147	1.0874	2.0953	0.758234	1.5063	0.959863	0.970874	2.566	1.1294	1.7412	0.956584	8.2496	8.0128	3.1825	5.7658	1.8098	3.5725	2.9789	2.0562	4.3287	5.1088
4.3	0.9019	2.6234	0.7428	1.0072	1.6557	3.2694	1.6404	7.8297	0.787679	2.9241	1.0886	2.0795	0.758898	1.507	0.968782	0.972087	2.5594	1.1316	1.7407	0.960871	8.2448	8.0184	3.1727	5.763	1.8117	3.6311	2.992	2.0734	4.3007	5.0766
4.4	0.9042	2.6303	0.7453	1.0107	1.6511	3.2973	1.6442	7.8253	0.787261	2.9239	1.0888	2.0727	0.760226	1.5135	0.97187	0.975485	2.5508	1.1328	1.7419	0.957903	8.2189	8.0294	3.1688	5.7658	1.8097	3.68	3.0098	2.0643	4.2758	5.0466
4.5	0.9023	2.6342	0.7474	1.0061	1.6476	3.3133	1.6473	7.8315	0.787094	2.9272	1.0891	2.0762	0.763627	1.5121	0.969811	0.972573	2.5437	1.1326	1.742	0.957133	8.2151	8.0359	3.176	5.7467	1.8086	3.6859	3.0238	2.0711	4.2523	5.0191
4.6	0.9022	2.6335	0.7506	1.0078	1.6466	3.3185	1.6581	7.8297	0.785338	2.9279	1.0883	2.0975	0.768688	1.5157	0.963293	0.971602	2.5333	1.1358	1.738	0.958672	8.2352	8.0294	3.1669	5.7439	1.8104	3.6317	3.0425	2.0737	4.2312	4.9933
4.7	0.9024	2.6361	0.7528	1.0062	1.6457	3.3295	1.6646	7.8164	0.78375	2.9222	1.0924	2.1262	0.770928	1.5178	0.958834	0.971602	2.5272	1.1333	1.7395	0.96164	8.266	8.0027	3.1758	5.7389	1.8117	3.6102	3.0477	2.0815	4.2124	4.9703
4.8	0.9025	2.6375	0.7532	1.0065	1.6414	3.3092	1.6726	7.8306	0.783499	2.9236	1.0909	2.1605	0.770265	1.5181	0.962607	0.973544	2.5165	1.1331	1.7371	0.959771	8.2486	8.0276	3.1708	5.7227	1.8117	3.6695	3.046	2.0772	4.1948	4.9498
4.9	0.9	2.6394	0.7553	1.0056	1.6364	3.3196	1.684	7.7803	0.784753	2.9336	1.0905	2.2003	0.771426	1.5187	0.963636	0.96699	2.5113	1.1336	1.7395	0.959222	8.2237	8.0239	3.1659	5.7299	1.8079	3.6871	3.0614	2.078	4.1788	4.9308
5	0.9017	2.638	0.7554	1.0082	1.6372	3.3041	1.6973	7.7794	0.78283	2.9358	1.0927	2.2498	0.774496	1.5169	0.965352	0.971602	2.5085	1.1334	1.7385	0.959112	8.2438	8.0027	3.1641	5.7199	1.8061	3.643	3.0607	2.0976	4.1647	4.9136
5.1	0.8992	2.6373	0.7564	1.0064	1.6341	3.3289	1.7036	7.7628	0.781827	2.9525	1.0906	2.2921	0.77574	1.5206	0.968439	0.969903	2.4973	1.1305	1.7366	0.958123	8.2113	7.9963	3.1597	5.7243	1.8056	3.6686	3.0739	2.0805	4.1517	4.8983
5.2	0.9034	2.6318	0.7573	1.0092	1.6319	3.3191	1.7101	7.7873	0.776895	2.9645	1.0909	2.3372	0.78047	1.5191	0.966724	0.970388	2.4937	1.134	1.7356	0.958123	8.2371	8.0174	3.1584	5.7055	1.8026	3.7118	3.0794	2.1069	4.1401	4.8831
5.3	0.9007	2.6306	0.7619	1.0091	1.6292	3.335	1.7156	7.79	0.776812	2.9758	1.0906	2.3592	0.780138	1.5172	0.969468	0.969417	2.4943	1.131	1.7359	0.96164	8.2429	7.9872	3.1501	5.6966	1.8013	3.6498	3.0642	2.1099	4.1297	4.8706
5.4	0.8984	2.6342	0.7644	1.0107	1.6284	3.3218	1.7236	7.7663	0.77723	2.9867	1.0857	2.3886	0.777483	1.5169	0.970154	0.971117	2.4849	1.1336	1.7363	0.96131	8.2438	7.9735	3.1509	5.685	1.8035	3.6522	3.0604	2.0901	4.1201	4.8595
5.5	0.8984	2.6322	0.7635	1.01	1.628	3.3202	1.731	7.7865	0.776477	2.9944	1.0911	2.4126	0.780801	1.5135	0.968439	0.974757	2.4879	1.1346	1.7356	0.96098	8.2237	8	3.1463	5.6811	1.8035	3.6661	3.0425	2.1055	4.1108	4.848
5.6	0.8993	2.6306	0.7628	1.0127	1.6243	3.3267	1.7331	7.7584	0.773886	2.9964	1.0888	2.4256	0.781797	1.5124	0.968439	0.970388	2.4955	1.1335	1.7337	0.96164	8.2094	7.9799	3.145	5.6668	1.8038	3.6302	3.0312	2.104	4.1026	4.8374
5.7	0.9012	2.6228	0.7643	1.0134	1.6275	3.3087	1.7327	7.7672	0.772799	2.9976	1.0864	2.4178	0.781631	1.5125	0.966724	0.970388	2.5051	1.1331	1.7339	0.962409	8.2352	7.9535	3.1417	5.6679	1.8012	3.6162	3.0238	2.1148	4.0945	4.829
5.8	0.9024	2.6247	0.7661	1.0147	1.6224	3.3328	1.7352	7.7523	0.773134	3.0105	1.0877	2.4271	0.780221	1.5112	0.964666	0.973301	2.5135	1.1331	1.7371	0.959442	8.2103	7.9354	3.1404	5.6718	1.7987	3.6501	3.0074	2.0953	4.0878	4.8224
5.9	0.904	2.6249	0.7666	1.0193	1.6192	3.3196	1.7362	7.7375	0.772883	3.0125	1.0888	2.431	0.782378	1.5106	0.966381	0.973301	2.5268	1.1335	1.7361	0.963069	8.2228	7.9281	3.1378	5.6482	1.7997	3.6427	3.0059	2.1167	4.0814	4.8181
6	0.9062	2.6219	0.7662	1.02	1.6173	3.3557	1.7349	7.7245	0.772465	3.014	1.0918	2.4413	0.783622	1.512	0.973242	0.973301	2.5426	1.1317	1.732	0.9612	8.2208	7.9164	3.1381	5.6504	1.795	3.625	2.9915	2.1081	4.0761	4.8181
6.1	0.9044	2.6217	0.77	1.021	1.6144	3.3433	1.7363	7.7462	0.771629	3.0135	1.0948	2.4326	0.782627	1.5151	0.968782	0.970631	2.5531	1.1328	1.7345	0.966806	8.2094	7.9128	3.1342	5.651	1.7918	3.6199	2.9833	2.1215	4.0708	4.826
6.2	0.9075	2.6194	0.7719	1.0222	1.6148	3.39	1.7322	7.7253	0.774388	3.0211	1.0957	2.4335	0.785614	1.5165	0.97084	0.97233	2.559	1.1318	1.7328	0.966146	8.1932	7.9065	3.144	5.6319	1.7946	3.5987	2.9862	2.0981	4.0663	4.8396
6.3	0.9075	2.6175	0.7742	1.0213	1.6169	3.3808	1.7324	7.7245	0.771295	3.0265	1.0991	2.4262	0.785614	1.5228	0.972213	0.97233	2.5672	1.1309	1.7366	0.963838	8.2037	7.9119	3.1481	5.6215	1.7968	3.5981	2.9789	2.0777	4.0614	4.8609
6.4	0.9094	2.6215	0.7755	1.0225	1.6152	3.42	1.7312	7.7132	0.772799	3.0258	1.0967	2.4153	0.785282	1.5256	0.968782	0.973786	2.5707	1.1312	1.7346	0.963069	8.2218	7.902	3.1548	5.6167	1.7927	3.6117	2.9666	2.0976	4.0572	4.8903
6.5	0.909	2.6167	0.7746	1.0257	1.6128	3.418	1.7281	7.6873	0.772632	3.0226	1.1023	2.4032	0.786858	1.532	0.965352	0.976214	2.5769	1.1302	1.7393	0.967685	8.2237	7.8546	3.16	5.6064	1.7928	3.586	2.9587	2.1002	4.0533	4.9208
6.6	0.9078	2.6194	0.7766	1.0255	1.6088	3.435	1.7224	7.689	0.771629	3.0287	1.1065	2.3926	0.7886	1.5339	0.965695	0.973786	2.5794	1.1314	1.7399	0.964827	8.2027	7.851	3.1649	5.6075	1.7955	3.5773	2.9613	2.0995	4.0498	4.9512
6.7	0.9097	2.6213	0.7794	1.0248	1.6106	3.4545	1.7153	7.6821	0.774137	3.0359	1.1084	2.3692	0.788517	1.5396	0.963979	0.97767	2.5827	1.133	1.7402	0.963618	8.179	7.8572	3.1721	5.5929	1.7902	3.5248	2.951	2.032	4.046	4.9795
6.8	0.9113	2.628	0.7802	1.0231	1.6117	3.4382	1.7159	7.6795	0.77514	3.0401	1.1128	2.3569	0.789264	1.5402	0.961235	0.975243	2.5846	1.1315	1.7419	0.964827	8.239	7.8208	3.1745	5.595	1.7888	3.5148	2.9424	2.0633	4.0421	5.0016
6.9	0.9114	2.6261	0.7813	1.0229	1.607	3.4686	1.7142	7.6795	0.774137	3.0413	1.1195	2.3371	0.793495	1.5435	0.960892	0.975	2.5914	1.1315	1.7437	0.969114	8.2132	7.8244	3.1807	5.588	1.7942	3.5812	2.9431	2.0631	4.0383	5.0173
7	0.9091	2.6257	0.784	1.022	1.6052	3.4433	1.7071	7.6907	0.774889	3.0386	1.1213	2.3192	0.795736	1.5508	0.969811	0.978641	2.5958	1.133	1.749	0.969993	8.2304	7.8235	3.1852	5.5843	1.7898	3.5776	2.9317	2.0676	4.0345	5.028
7.1	0.9137	2.6261	0.7847	1.0245	1.6085	3.4799	1.7033	7.6821	0.774806	3.0351	1.1234	2.3042	0.796067	1.5502	0.972213	0.974272	2.6056	1.1311	1.7506	0.969444	8.2161	7.8182	3.1852	5.5692	1.7883	3.5278	2.93	2.0747	4.0296	5.0317
7.2	0.9155	2.6228	0.7848	1.0233	1.6065	3.4531	1.6983	7.6564	0.775056	3.0369	1.1208	2.2802	0.798722	1.5486	0.975986	0.971602	2.6173	1.1315	1.7536	0.968784	8.2515	7.8049	3.1807	5.5591	1.7875	3.5325	2.9248	2.0689	4.0251	5.0303
7.3	0.9129	2.6196	0.7866	1.0227	1.6072	3.4871	1.6924	7.6684	0.776477	3.0376	1.1228	2.2653	0.801875	1.5548	0.975643	0.970388	2.6211	1.1313	1.7544	0.971312	8.2525	7.8023	3.1753	5.55	1.7825	3.5113	2.9192	2.0755	4.021	5.0261
7.4	0.9129	2.6236	0.7889	1.0206	1.607	3.4718	1.6897	7.6726	0.775474	3.0294	1.1273	2.2478	0.798971	1.5521	0.969468	0.972573	2.6276	1.1319	1.7607	0.970873	8.2814	7.7891	3.1755	5.5564	1.7847	3.4706	2.9121	2.1003	4.0165	5.0205
7.5	0.9123	2.624	0.7871	1.021	1.6112	3.4903	1.6859	7.6726	0.775391	3.0324	1.1263	2.2367	0.799967	1.5533	0.97187	0.976942	2.6282	1.1328	1.759	0.972302	8.2506	7.7715	3.1664	5.5602	1.7907	3.521	2.9071	2.114	4.0123	5.0113
7.6	0.9131	2.6146	0.7898	1.0211	1.6122	3.49	1.6803	7.6478	0.775056	3.0292	1.1288	2.2125	0.801294	1.5492	0.968439	0.971117	2.6301	1.1323	1.7583	0.973291	8.2554	7.7777	3.1698	5.5741	1.7888	3.4697	2.8975	2.1007	4.0085	4.9983
7.7	0.9108	2.6077	0.7916	1.0205	1.6169	3.4833	1.6783	7.6615	0.775642	3.0167	1.1275	2.2007	0.80005	1.5506	0.971527	0.975243	2.6251	1.1314	1.76	0.971862	8.2573	7.7698	3.16	5.5956	1.7898	3.5192	2.8952	2.148	4.0044	4.9836
7.8	0.9126	2.6112	0.7943	1.021	1.6201	3.509	1.6755	7.6641	0.774304	3.0186	1.1315	2.1972	0.799635	1.5493	0.968096	0.975485	2.6226	1.133	1.7603	0.971752	8.2563	7.7777	3.1483	5.6053	1.7834	3.5283	2.8968	2.179	4.0013	4.9685
7.9	0.9147	2.6148	0.7952	1.0232	1.624	3.4909	1.6753	7.6666	0.770877	3.0091	1.1322	2.1894	0.799469	1.5486	0.964322	0.976214	2.6194	1.1323	1.7587	0.970983	8.2621	7.7873	3.1486	5.6302	1.7838	3.5275	2.8959	2.1903	3.9975	4.9516
8	0.9128	2.6037	0.7998	1.0213	1.6318	3.5204	1.6739	7.6873	0.77071	3.0159	1.1332	2.1716	0.798805	1.5458	0.963293	0.975485	2.6173	1.1338	1.7586	0.97494	8.2496	7.7715	3.1435	5.6575	1.7834	3.479	2.8935	2.1968	3.9941	4.9353
8.1	0.9138	2.6024	0.8011	1.0236	1.6364	3.4955	1.6778	7.6933	0.76862	3.0221	1.1299	2.1663	0.797146	1.5417	0.962264	0.976942	2.607	1.1334	1.7617	0.971972	8.2554	7.7637	3.1378	5.7132	1.7864	3.4796	2.89	2.215	3.9906	4.919
8.2	0.9129	2.6006	0.8021	1.0247	1.6415	3.5225	1.6797	7.6812	0.76979	3.0216	1.1334	2.1588	0.793993	1.5431	0.966038	0.979369	2.606	1.135	1.7605	0.971862	8.2669	7.7558	3.1304	5.7607	1.7824	3.4955	2.8905	2.1987	3.9865	4.9037
8.3	0.9114	2.5993	0.8042	1.0275	1.6462	3.5008	1.6852	7.6787	0.770375	3.0162	1.1326	2.1476	0.795901	1.5416	0.973242	0.98034	2.5968	1.133	1.7592	0.97483	8.2592	7.7506	3.1207	5.7912	1.779	3.4848	2.8881	2.1844	3.9828	4.8876
8.4	0.9093	2.5995	0.805	1.028	1.6504	3.5236	1.6864	7.7115	0.769121	3.0088	1.1288	2.1406	0.796897	1.5393	0.968096	0.975971	2.5935	1.135	1.7569	0.975709	8.2737	7.7453	3.1037	5.8379	1.7861	3.4706	2.8893	2.1676	3.9793	4.8724
8.5	0.9078	2.5949	0.8089	1.0314	1.6575	3.5269	1.6923	7.6959	0.769539	3.0221	1.129	2.1281	0.791753	1.5372	0.970154	0.975485	2.5881	1.135	1.7593	0.973291	8.266	7.7253	3.0993	5.8689	1.7848	3.5075	2.8877	2.1614	3.9759	4.8591
8.6	0.9083	2.5897	0.8113	1.0319	1.6648	3.5313	1.6941	7.6924	0.769372	3.0339	1.1291	2.1201	0.791504	1.5345	0.96295	0.973786	2.5829	1.1336	1.764	0.975269	8.2496	7.7471	3.0882	5.9153	1.7896	3.4591	2.8818	2.1397	3.9725	4.8476
8.7	0.9093	2.5908	0.8134	1.0375	1.6613	3.5464	1.6997	7.6993	0.767282	3.0093	1.1289	2.1128	0.790509	1.5337	0.972556	0.973058	2.5771	1.1363	1.7662	0.972082	8.2689	7.7158	3.0787	5.9481	1.7944	3.5148	2.8788	2.1334	3.9698	4.8374
8.8	0.9067	2.5872	0.8153	1.0388	1.6619	3.5233	1.7058	7.6907	0.766363	3.0127	1.1338	2.1057	0.791255	1.5318	0.975986	0.971845	2.5775	1.136	1.7685	0.975599	8.2959	7.7271	3.0747	5.9865	1.7911	3.4845	2.8774	2.1394	3.9667	4.826
8.9	0.9043	2.586	0.8167	1.0394	1.6649	3.541	1.7047	7.6907	0.762936	3.0167	1.1312	2.104	0.793246	1.5245	0.976329	0.978398	2.5687	1.1362	1.7708	0.97461	8.2804	7.7331	3.0754	6.0325	1.7953	3.5254	2.8728	2.1649	3.964	4.815
9	0.9056	2.5862	0.8196	1.0421	1.6626	3.5049	1.7061	7.6881	0.762183	3.0262	1.1307	2.0934	0.790757	1.524	0.970154	0.978641	2.5625	1.136	1.7707	0.97417	8.2862	7.7375	3.0712	6.0826	1.792	3.4833	2.8721	2.1284	3.961	4.8058
9.1	0.9049	2.5839	0.8208	1.0424	1.6648	3.5198	1.7106	7.6942	0.761013	3.0285	1.1305	2.0918	0.791006	1.5281	0.972556	0.978155	2.5606	1.1363	1.7764	0.970983	8.2727	7.7314	3.0719	6.1119	1.7911	3.4666	2.863	2.1697	3.9579	4.7971
9.2	0.9063	2.5821	0.824	1.0442	1.6623	3.4897	1.7086	7.6924	0.760595	3.0406	1.1331	2.0859	0.791753	1.5216	0.975986	0.973301	2.5531	1.1393	1.776	0.972961	8.266	7.7366	3.0664	6.163	1.795	3.468	2.8609	2.1435	3.9545	4.7892
9.3	0.9055	2.5825	0.8242	1.0439	1.662	3.5002	1.7104	7.6907	0.763103	3.0482	1.1299	2.0837	0.787356	1.5163	0.969811	0.976942	2.5473	1.1376	1.7783	0.97417	8.3134	7.7149	3.054	6.1916	1.7956	3.5084	2.8579	2.1204	3.9508	4.7801
9.4	0.9042	2.5794	0.8268	1.046	1.666	3.4833	1.7117	7.6795	0.761264	3.0477	1.1336	2.0807	0.787771	1.5163	0.972556	0.977184	2.5467	1.1363	1.7835	0.97384	8.2746	7.7115	3.0525	6.2266	1.7889	3.4516	2.8575	2.1071	3.9474	4.7745
9.5	0.9042	2.5786	0.8282	1.0472	1.6601	3.4761	1.7155	7.695	0.761849	3.0473	1.129	2.0671	0.790177	1.5144	0.972213	0.97767	2.5388	1.1364	1.7844	0.97373	8.2746	7.7227	3.0517	6.2392	1.7908	3.4254	2.867	2.1154	3.944	4.7671
9.6	0.9069	2.5786	0.829	1.0479	1.6566	3.4741	1.7139	7.7192	0.76093	3.0672	1.1268	2.0677	0.790923	1.5148	0.978731	0.975485	2.5307	1.1374	1.7891	0.97439	8.2833	7.7288	3.055	6.2594	1.7917	3.4376	2.8586	2.1103	3.9413	4.7602
9.7	0.907	2.5796	0.83	1.0443	1.6563	3.4533	1.7127	7.7253	0.761013	3.0642	1.1302	2.0674	0.792749	1.5126	0.97084	0.979854	2.5329	1.1381	1.7898	0.972521	8.2611	7.714	3.0567	6.2702	1.7847	3.3654	2.8547	2.0914	3.9386	4.7516
9.8	0.9062	2.5775	0.8296	1.0417	1.6544	3.4674	1.7122	7.7219	0.761097	3.0644	1.1298	2.0624	0.791587	1.5124	0.970154	0.980097	2.5305	1.1365	1.7917	0.97428	8.2438	7.7602	3.0644	6.2836	1.7857	3.4413	2.8549	2.0951	3.9366	4.7456
9.9	0.9065	2.5806	0.8352	1.0451	1.6571	3.4419	1.7117	7.7288	0.760846	3.0707	1.1277	2.055	0.793578	1.5101	0.96741	0.976942	2.5244	1.1357	1.7963	0.97406	8.241	7.7436	3.0722	6.2912	1.7844	3.4602	2.8612	2.125	3.9342	4.7383
10	0.9055	2.5804	0.8346	1.0448	1.6506	3.4479	1.7111	7.7462	0.759091	3.0779	1.1306	2.0537	0.789347	1.5094	0.969468	0.973301	2.5175	1.136	1.7963	0.97384	8.2621	7.7349	3.0855	6.2918	1.7841	3.4622	2.8524	2.1189	3.9319	4.734
10.1	0.9044	2.5792	0.8379	1.0436	1.6506	3.4316	1.7127	7.775	0.757419	3.0799	1.1276	2.0504	0.793081	1.5091	0.9753	0.971602	2.523	1.1369	1.7977	0.973291	8.2872	7.7375	3.0976	6.2791	1.7837	3.4254	2.8566	2.13	3.9319	4.7297
10.2	0.9049	2.5846	0.8407	1.0404	1.6491	3.4288	1.7121	7.7856	0.757335	3.0722	1.13	2.0458	0.792666	1.511	0.974271	0.974272	2.5189	1.1384	1.7974	0.973071	8.2708	7.7672	3.1075	6.2746	1.7857	3.3917	2.8559	2.1069	3.9373	4.7242
10.3	0.9038	2.5887	0.8419	1.0406	1.6466	3.4219	1.7085	7.8058	0.759341	3.0754	1.1301	2.0441	0.79167	1.5106	0.980103	0.97767	2.5161	1.1363	1.7981	0.97384	8.2717	7.7549	3.123	6.2816	1.785	3.4416	2.8612	2.1093	3.9515	4.7229
10.4	0.9022	2.5968	0.8425	1.0414	1.6484	3.4149	1.7065	7.8288	0.758338	3.0845	1.1309	2.0441	0.791836	1.5111	0.974271	0.976699	2.5191	1.1362	1.7979	0.973621	8.292	7.7488	3.1304	6.2848	1.783	3.5128	2.8612	2.1137	3.978	4.7237
10.5	0.9047	2.6035	0.8416	1.0378	1.6483	3.4013	1.7069	7.8403	0.758338	3.0794	1.1339	2.0358	0.790592	1.5136	0.975986	0.976942	2.5167	1.1385	1.801	0.976808	8.2563	7.7742	3.1401	6.2525	1.7809	3.4336	2.8593	2.1233	4.0185	4.7254
10.6	0.9048	2.6135	0.845	1.0376	1.6487	3.3943	1.7075	7.8475	0.758255	3.0672	1.1348	2.0348	0.788932	1.5151	0.975643	0.974029	2.5167	1.1367	1.8003	0.973621	8.2631	7.7654	3.146	6.2499	1.7799	3.4778	2.8566	2.1059	4.0722	4.7361
10.7	0.9052	2.6276	0.845	1.0384	1.65	3.3878	1.7072	7.8475	0.757669	3.0682	1.1331	2.0391	0.789347	1.517	0.973242	0.975485	2.5236	1.1383	1.7978	0.97384	8.2323	7.7654	3.1489	6.236	1.7788	3.447	2.8582	2.13	4.133	4.752
10.8	0.9041	2.6352	0.843	1.0385	1.6506	3.3828	1.7115	7.8751	0.754075	3.0672	1.1332	2.0353	0.792002	1.5158	0.974614	0.974029	2.521	1.1374	1.7987	0.972521	8.3056	7.7777	3.146	6.2304	1.7766	3.3909	2.8591	2.1232	4.1945	4.7745
10.9	0.9013	2.6471	0.8465	1.0342	1.6514	3.3808	1.7149	7.8635	0.757419	3.0634	1.1338	2.0392	0.790675	1.5217	0.982161	0.973786	2.5206	1.1368	1.7977	0.971642	8.2814	7.7812	3.1592	6.2254	1.7772	3.4402	2.8575	2.0944	4.2494	4.8014
11	0.9021	2.6607	0.8474	1.0318	1.6507	3.3724	1.7176	7.8715	0.757168	3.0572	1.1376	2.045	0.788766	1.5289	0.973585	0.975243	2.5177	1.1366	1.7955	0.972192	8.3124	7.7663	3.1489	6.2097	1.7782	3.4686	2.8586	2.1	4.2954	4.8295
11.1	0.9032	2.6622	0.8472	1.0324	1.6513	3.3616	1.7181	7.8831	0.758505	3.0522	1.1342	2.0565	0.791421	1.5312	0.977702	0.973058	2.5195	1.136	1.7949	0.97472	8.2737	7.7891	3.1473	6.1884	1.7831	3.4433	2.8579	2.1113	4.3317	4.86
11.2	0.9015	2.6697	0.8479	1.0338	1.6515	3.351	1.728	7.8876	0.75583	3.0507	1.1362	2.0662	0.789762	1.538	0.977702	0.975	2.5165	1.1354	1.7936	0.972851	8.2804	7.7777	3.1478	6.1698	1.7901	3.39	2.8566	2.0762	4.357	4.8894
11.3	0.9014	2.6744	0.8489	1.0326	1.6513	3.34	1.7328	7.9056	0.755496	3.0495	1.1363	2.0822	0.789845	1.5418	0.976672	0.973058	2.5157	1.1375	1.7907	0.97461	8.2862	7.7715	3.136	6.1661	1.794	3.4197	2.8589	2.0719	4.3747	4.9114
11.4	0.9038	2.6802	0.8498	1.0308	1.6513	3.3256	1.7416	7.9011	0.755413	3.0443	1.1358	2.0946	0.790343	1.5494	0.9753	0.971359	2.5159	1.1381	1.7888	0.97439	8.3056	7.8005	3.136	6.1506	1.7987	3.4402	2.8549	2.1223	4.3855	4.928
11.5	0.9031	2.683	0.8508	1.0294	1.6504	3.31	1.7453	7.8939	0.754911	3.0428	1.135	2.0988	0.789015	1.5547	0.971184	0.975	2.5121	1.1386	1.7931	0.973071	8.294	7.7935	3.1286	6.1593	1.8034	3.4353	2.8545	2.0949	4.3886	4.9389
11.6	0.9015	2.6902	0.8509	1.0277	1.6518	3.294	1.7524	7.9002	0.752988	3.0396	1.1363	2.113	0.787439	1.5586	0.974614	0.975485	2.5053	1.1409	1.7907	0.97472	8.2979	7.7759	3.1273	6.1605	1.8061	3.4197	2.8575	2.0735	4.3859	4.9462
11.7	0.9026	2.6967	0.8514	1.027	1.6513	3.2823	1.7596	7.8921	0.753908	3.0361	1.1333	2.1186	0.788351	1.5589	0.977015	0.976699	2.5027	1.1435	1.7863	0.976039	8.3329	7.7821	3.1163	6.1531	1.8111	3.3937	2.8531	2.0975	4.3789	4.9535
11.8	0.9036	2.6988	0.8521	1.0259	1.6506	3.2734	1.763	7.884	0.75675	3.0364	1.1359	2.1187	0.787107	1.5628	0.9753	0.974272	2.5001	1.1439	1.7857	0.97373	8.2872	7.8005	3.1253	6.1642	1.8135	3.4379	2.857	2.1039	4.367	4.9539
11.9	0.9039	2.7012	0.8554	1.0253	1.6529	3.2678	1.7629	7.8751	0.754409	3.0299	1.1353	2.1211	0.786775	1.5673	0.974271	0.971845	2.4963	1.1441	1.7872	0.977248	8.2785	7.7997	3.1097	6.1934	1.8194	3.4625	2.8524	2.075	4.3493	4.9516
12	0.9023	2.7038	0.857	1.0268	1.6498	3.2643	1.7662	7.8697	0.754409	3.0369	1.1365	2.1266	0.786609	1.5674	0.977702	0.974757	2.4973	1.146	1.7892	0.973071	8.3047	7.8173	3.0991	6.2134	1.8209	3.4622	2.8506	2.0767	4.3287	4.9462
12.1	0.9023	2.7049	0.8568	1.0258	1.6489	3.2581	1.7724	7.8572	0.752821	3.0356	1.1335	2.124	0.786277	1.5715	0.983877	0.975243	2.4951	1.1475	1.787	0.978347	8.264	7.8626	3.1059	6.2159	1.8221	3.4533	2.8536	2.0901	4.3059	4.9394
12.2	0.9031	2.7112	0.8637	1.0252	1.6481	3.2541	1.775	7.8688	0.756834	3.0468	1.1352	2.116	0.786028	1.5766	0.980103	0.975243	2.4989	1.1473	1.7857	0.977248	8.3115	7.8787	3.1001	6.2109	1.8271	3.4646	2.8561	2.1022	4.2815	4.9294
12.3	0.9051	2.7108	0.8674	1.0245	1.6433	3.2488	1.7779	7.8787	0.754493	3.0517	1.1351	2.1184	0.786858	1.574	0.982504	0.974029	2.5079	1.1483	1.7847	0.976039	8.3319	7.929	3.0991	6.2216	1.828	3.4467	2.851	2.0614	4.2568	4.919
12.4	0.9032	2.7103	0.8668	1.0254	1.6469	3.2458	1.7793	7.851	0.757001	3.0547	1.1393	2.1154	0.787605	1.5749	0.983877	0.975485	2.5165	1.1506	1.785	0.97395	8.3173	7.9562	3.1026	6.2109	1.8252	3.4092	2.857	2.0714	4.2323	4.9082
12.5	0.9019	2.7077	0.8668	1.0234	1.647	3.2397	1.7809	7.8324	0.756917	3.0477	1.1323	2.1143	0.788351	1.5762	0.98422	0.975971	2.5337	1.1515	1.788	0.975379	8.3076	7.9973	3.0933	6.2109	1.8335	3.4308	2.8536	2.0794	4.2095	4.8992
12.6	0.9022	2.7099	0.8669	1.0218	1.6443	3.2317	1.7828	7.8262	0.759007	3.0592	1.1321	2.112	0.787605	1.5764	0.985249	0.973786	2.548	1.1509	1.7896	0.976259	8.2853	8.0211	3.0887	6.2103	1.8278	3.4296	2.8593	2.0684	4.1875	4.8894
12.7	0.9023	2.704	0.8733	1.0222	1.6416	3.2238	1.7863	7.8412	0.763521	3.0577	1.1341	2.0991	0.787605	1.5781	0.981132	0.978155	2.5578	1.1537	1.7901	0.977577	8.329	8.072	3.0857	6.2228	1.8213	3.4146	2.8526	2.0765	4.1676	4.88
12.8	0.9019	2.6975	0.8729	1.0218	1.6422	3.2172	1.7893	7.8324	0.76419	3.0639	1.1326	2.0934	0.786526	1.5707	0.987993	0.976214	2.5742	1.1533	1.7909	0.975709	8.3603	8.1149	3.0961	6.2003	1.8184	3.4365	2.8543	2.0958	4.1491	4.872
12.9	0.9003	2.6902	0.8756	1.0236	1.6414	3.2093	1.794	7.8368	0.763772	3.0619	1.1347	2.0968	0.788434	1.572	0.986621	0.976456	2.5843	1.1558	1.7905	0.977687	8.3056	8.1506	3.1009	6.2009	1.8216	3.4599	2.857	2.1022	4.133	4.864
13	0.9009	2.685	0.8747	1.0185	1.6395	3.2003	1.7946	7.8315	0.766948	3.0684	1.1339	2.0822	0.787356	1.5733	0.986621	0.974272	2.5943	1.1564	1.7907	0.977468	8.3085	8.1913	3.0976	6.1897	1.8195	3.4242	2.857	2.0988	4.1219	4.8564
13.1	0.9014	2.6861	0.8748	1.02	1.6414	3.1904	1.799	7.8005	0.769874	3.0692	1.135	2.0697	0.792251	1.5704	0.981132	0.977427	2.5966	1.1567	1.7907	0.979116	8.2979	8.2199	3.0935	6.1791	1.8156	3.4393	2.8605	2.1034	4.1194	4.8493
13.2	0.9002	2.6774	0.8722	1.0208	1.6369	3.1823	1.8025	7.812	0.772632	3.0627	1.1325	2.0729	0.789098	1.5714	0.985935	0.974272	2.6041	1.1593	1.7937	0.979116	8.3183	8.2438	3.1011	6.1822	1.8194	3.4462	2.8589	2.1162	4.129	4.8454
13.3	0.8979	2.6761	0.8728	1.0205	1.6361	3.1758	1.8085	7.8226	0.773217	3.0644	1.1362	2.0704	0.78943	1.5704	0.980446	0.974272	2.602	1.1572	1.7928	0.982743	8.3261	8.2737	3.1014	6.1661	1.8176	3.3965	2.8577	2.1116	4.1527	4.8427
13.4	0.8981	2.6744	0.8717	1.0199	1.6384	3.1682	1.812	7.8324	0.773468	3.0624	1.1367	2.0724	0.792251	1.5689	0.987993	0.974029	2.6008	1.158	1.7947	0.978347	8.33	8.3037	3.1072	6.1525	1.8188	3.4075	2.8513	2.1027	4.1894	4.8431
13.5	0.8975	2.6721	0.8733	1.0201	1.636	3.1641	1.816	7.8537	0.775809	3.0619	1.136	2.0782	0.791836	1.5697	0.989365	0.974029	2.602	1.1599	1.7923	0.979116	8.295	8.3251	3.0981	6.1512	1.8163	3.4533	2.8582	2.1186	4.2342	4.8454
13.6	0.8953	2.6639	0.8712	1.0231	1.6357	3.1597	1.8246	7.8528	0.77723	3.0669	1.134	2.0954	0.798888	1.5631	0.989365	0.974272	2.5978	1.1617	1.7944	0.975929	8.3378	8.3515	3.0945	6.1481	1.8103	3.3867	2.8603	2.1281	4.2811	4.8498
13.7	0.8987	2.6676	0.8731	1.0233	1.6383	3.1581	1.8281	7.8697	0.775725	3.0654	1.1388	2.1152	0.801709	1.5629	0.986278	0.974272	2.596	1.1631	1.7923	0.977138	8.3222	8.3603	3.0961	6.1309	1.8139	3.4134	2.8637	2.1444	4.3234	4.8555
13.8	0.8986	2.6635	0.874	1.0248	1.6354	3.1569	1.8339	7.8386	0.777899	3.0614	1.1399	2.1385	0.802954	1.5611	0.988336	0.975728	2.5968	1.1629	1.7956	0.977248	8.3115	8.3682	3.1037	6.1082	1.8106	3.4614	2.8697	2.1295	4.3581	4.8622
13.9	0.9004	2.6641	0.8725	1.0267	1.6373	3.1587	1.839	7.8706	0.776895	3.0664	1.143	2.1678	0.803866	1.5574	0.990395	0.976214	2.5947	1.1623	1.7952	0.978677	8.3183	8.3652	3.0978	6.0869	1.8035	3.439	2.8721	2.1232	4.3839	4.8666
14	0.8994	2.659	0.872	1.0287	1.6381	3.1607	1.8427	7.893	0.775725	3.0732	1.1408	2.1944	0.806438	1.5585	0.989708	0.975971	2.5958	1.1638	1.7962	0.981095	8.3829	8.3839	3.1001	6.093	1.8067	3.4106	2.873	2.1094	4.4026	4.868
14.1	0.8971	2.6594	0.8734	1.0309	1.633	3.1597	1.8451	7.8948	0.779152	3.0737	1.1423	2.2217	0.808595	1.557	0.98765	0.976214	2.5964	1.1628	1.7915	0.981864	8.3662	8.3928	3.1069	6.0754	1.8063	3.4496	2.8751	2.1312	4.4143	4.8666
14.2	0.8978	2.652	0.8714	1.0296	1.6334	3.1594	1.8455	7.8823	0.778316	3.0804	1.1429	2.2421	0.810835	1.5528	0.99211	0.974029	2.6001	1.162	1.7889	0.982194	8.3869	8.4017	3.108	6.0784	1.8048	3.4651	2.8781	2.1284	4.4236	4.864
14.3	0.88972	2.6535	0.87	1.0301	1.6323	3.1688	1.8496	7.8769	0.7784	3.0832	1.1444	2.2594	0.817473	1.5503	0.991081	0.978155	2.6003	1.1646	1.7915	0.981095	8.3829	8.3849	3.1082	6.0693	1.8032	3.4528	2.8781	2.1186	4.4397	4.8604
14.4	0.9	2.6471	0.8722	1.0306	1.6349	3.1841	1.849	7.859	0.774889	3.0804	1.1424	2.2826	0.817722	1.5502	0.985935	0.977184	2.6039	1.1652	1.7946	0.983183	8.3741	8.4096	3.1057	6.05	1.7991	3.4663	2.8767	2.1113	4.4682	4.8564
14.5	0.8998	2.6377	0.868	1.0332	1.6315	3.2024	1.8485	7.893	0.776895	3.0867	1.1437	2.2976	0.820957	1.5501	0.98422	0.974272	2.606	1.1655	1.7927	0.980765	8.379	8.3829	3.1049	6.0427	1.8039	3.4531	2.8807	2.1416	4.5073	4.8529
14.6	0.8986	2.6331	0.8686	1.0323	1.6304	3.2259	1.8473	7.8975	0.775642	3.083	1.1446	2.3107	0.823861	1.5493	0.979417	0.972087	2.6095	1.1664	1.7902	0.979886	8.3829	8.378	3.1057	6.0307	1.8042	3.462	2.8888	2.1387	4.5533	4.852
14.7	0.8966	2.6295	0.8697	1.0312	1.6322	3.2469	1.8445	7.9002	0.775976	3.0882	1.1464	2.3127	0.822866	1.5467	0.981132	0.974757	2.6108	1.1673	1.7886	0.983293	8.3554	8.3819	3.1067	6.0199	1.81	3.447	2.8842	2.1521	4.5983	4.8609
14.8	0.8977	2.6266	0.8696	1.0333	1.6322	3.2584	1.8448	7.8912	0.775391	3.09	1.1433	2.3153	0.823198	1.5393	0.985592	0.977427	2.6133	1.1658	1.7931	0.980985	8.3809	8.3938	3.1077	6.0235	1.801	3.4447	2.8844	2.1607	4.6373	4.8773
14.9	0.899	2.6204	0.867	1.0339	1.6337	3.2734	1.8375	7.8564	0.776477	3.089	1.1438	2.317	0.823032	1.5407	0.987993	0.977913	2.6081	1.167	1.7898	0.982963	8.4394	8.379	3.1016	6.0062	1.7969	3.4098	2.8959	2.1649	4.6695	4.9037
15	0.9016	2.6188	0.8695	1.0334	1.6327	3.2994	1.8345	7.8519	0.776728	3.089	1.1459	2.3264	0.830001	1.5454	0.986278	0.974272	2.6081	1.1664	1.7883	0.981754	8.4444	8.3839	3.1014	6.0145	1.8012	3.4095	2.9045	2.1547	4.6931	4.9389
15.1	0.9015	2.6165	0.8649	1.0328	1.6326	3.3062	1.832	7.8697	0.778484	3.0875	1.151	2.3179	0.831992	1.5427	0.990051	0.975485	2.6095	1.1652	1.7905	0.983843	8.3957	8.3652	3.0961	6.0092	1.802	3.3878	2.9189	2.132	4.7071	4.9786
15.2	0.9004	2.615	0.867	1.0323	1.635	3.3248	1.8262	7.8867	0.779403	3.0827	1.1496	2.317	0.83166	1.5372	0.991081	0.974272	2.6049	1.1657	1.7882	0.983073	8.4027	8.377	3.0976	6.0247	1.8026	3.4268	2.9501	2.1654	4.7126	5.0187
15.3	0.9011	2.6083	0.8646	1.0325	1.6327	3.3364	1.8225	7.8653	0.781242	3.0847	1.1469	2.3101	0.837302	1.5368	0.989708	0.974272	2.6024	1.168	1.7891	0.984062	8.4126	8.3682	3.1001	6.008	1.7969	3.3968	2.9835	2.1593	4.7109	5.0536
15.4	0.9014	2.6062	0.865	1.0341	1.6341	3.3502	1.8184	7.8492	0.787428	3.0754	1.1478	2.3039	0.841201	1.5389	0.979417	0.975485	2.6001	1.1672	1.7898	0.983513	8.4264	8.3928	3.0948	5.9943	1.7972	3.3937	3.0216	2.1512	4.7033	5.0809
15.5	0.9023	2.6079	0.864	1.0333	1.6358	3.3682	1.8119	7.8697	0.78935	3.0714	1.1511	2.3088	0.841865	1.5372	0.987993	0.975243	2.5976	1.1675	1.7892	0.98758	8.3977	8.3888	3.0983	5.9943	1.7958	3.3895	3.0709	2.1716	4.6902	5.1002
15.6	0.9024	2.5999	0.861	1.0333	1.6346	3.3738	1.8048	7.843	0.793029	3.0734	1.1549	2.3059	0.845516	1.5382	0.987307	0.978883	2.6035	1.1652	1.7886	0.985052	8.4116	8.3701	3.1118	5.983	1.7908	3.387	3.111	2.1795	4.6707	5.114
15.7	0.9021	2.6043	0.8605	1.0332	1.6347	3.394	1.8013	7.8492	0.798378	3.0717	1.154	2.3081	0.848917	1.5362	0.981475	0.973786	2.6081	1.1656	1.7864	0.984392	8.4364	8.3515	3.1138	5.9776	1.794	3.3546	3.1422	2.188	4.6469	5.1211
15.8	0.9056	2.6085	0.8635	1.0325	1.637	3.3996	1.7936	7.8555	0.80122	3.0662	1.1565	2.3227	0.852319	1.5337	0.979417	0.977427	2.6148	1.1669	1.7882	0.985271	8.4354	8.375	3.1258	5.9794	1.7926	3.405	3.1659	2.1704	4.6161	5.1226
15.9	0.9039	2.6106	0.8619	1.0288	1.6357	3.4163	1.7877	7.8448	0.802558	3.0612	1.1565	2.3313	0.851406	1.535	0.984906	0.977427	2.6312	1.1649	1.7888	0.983733	8.4017	8.3721	3.1311	5.9682	1.7936	3.371	3.1823	2.1996	4.5802	5.1169
16	0.9042	2.6148	0.8646	1.0302	1.6373	3.4208	1.7795	7.8483	0.809245	3.0619	1.1576	2.3369	0.850494	1.5371	0.99211	0.976942	2.6433	1.165	1.7882	0.983403	8.378	8.3652	3.1329	5.9511	1.7937	3.3951	3.1943	2.2095	4.5411	5.105
16.1	0.9043	2.6116	0.8612	1.0304	1.6381	3.4308	1.7761	7.8412	0.812756	3.0639	1.1615	2.3477	0.851821	1.5355	0.991767	0.974272	2.6498	1.1639	1.7905	0.981534	8.3898	8.3682	3.1414	5.9475	1.7985	3.4129	3.2001	2.213	4.5	5.0917
16.2	0.9054	2.6146	0.8625	1.0305	1.6411	3.4405	1.7707	7.8359	0.813007	3.0707	1.1603	2.3558	0.851821	1.5326	0.989365	0.974272	2.6567	1.1653	1.7873	0.983073	8.378	8.3534	3.1587	5.964	1.7978	3.3909	3.2016	2.1914	4.4594	5.0757
16.3	0.9052	2.6148	0.8633	1.0288	1.6462	3.4356	1.7615	7.8501	0.814595	3.0777	1.1669	2.36	0.851572	1.5331	0.991767	0.973301	2.6648	1.1679	1.7848	0.982963	8.3898	8.3544	3.1566	5.9741	1.7946	3.399	3.1977	2.1851	4.4189	5.0574
16.4	0.9059	2.6173	0.8623	1.0268	1.6498	3.4427	1.7576	7.8368	0.815849	3.0867	1.1645	2.3622	0.851655	1.5351	0.999314	0.977913	2.6658	1.1669	1.7904	0.988569	8.3613	8.3397	3.1675	6.0062	1.7984	3.401	3.198	2.1804	4.3836	5.0377
16.5	0.9049	2.6144	0.8643	1.0279	1.6542	3.443	1.754	7.8341	0.816267	3.0961	1.1664	2.3717	0.852485	1.5351	0.988679	0.976456	2.6759	1.1644	1.7895	0.98681	8.3829	8.3348	3.1605	6.0572	1.7923	3.3677	3.1841	2.1626	4.3489	5.0164
16.6	0.9063	2.619	0.8634	1.0267	1.6627	3.4339	1.7473	7.8067	0.816601	3.1024	1.1677	2.3668	0.851821	1.5376	0.988336	0.976456	2.6794	1.1637	1.7889	0.985601	8.3977	8.329	3.1714	6.1027	1.7872	3.4038	3.1706	2.183	4.3169	4.9942
16.7	0.9072	2.6327	0.8612	1.025	1.6649	3.4356	1.7355	7.7953	0.817019	3.1197	1.1687	2.3666	0.854808	1.5325	0.989708	0.972087	2.6839	1.1665	1.7909	0.988679	8.4205	8.3309	3.169	6.1444	1.7877	3.4393	3.1563	2.1657	4.2886	4.9708
16.8	0.9077	2.6433	0.8636	1.027	1.6682	3.4385	1.7332	7.812	0.816601	3.125	1.1715	2.3639	0.855638	1.5358	0.991424	0.976456	2.685	1.1665	1.7899	0.993295	8.4066	8.328	3.1615	6.2103	1.7909	3.4493	3.1388	2.1599	4.2635	4.948
16.9	0.9042	2.6575	0.8667	1.0278	1.6719	3.42	1.7273	7.7944	0.81844	3.1337	1.1699	2.3624	0.861445	1.539	0.98765	0.975728	2.6884	1.1672	1.7885	0.993295	8.4364	8.3115	3.162	6.2588	1.7851	3.4467	3.1242	2.1423	4.2401	4.928
17	0.9061	2.6777	0.8646	1.0268	1.6752	3.4177	1.7245	7.8164	0.818691	3.1322	1.1703	2.346	0.861113	1.5456	0.98765	0.97767	2.6902	1.1677	1.7899	0.98725	8.4324	8.3027	3.1607	6.3065	1.7863	3.4651	3.1052	2.1433	4.219	4.9091
17.1	0.9073	2.6936	0.8657	1.0269	1.6782	3.418	1.7204	7.8014	0.817186	3.1345	1.17	2.3384	0.860947	1.549	0.991424	0.978155	2.6884	1.169	1.7917	0.990328	8.4027	8.3085	3.1659	6.3425	1.7841	3.4614	3.0943	2.1701	4.2011	4.8921
17.2	0.9053	2.709	0.8662	1.0244	1.6793	3.4036	1.7195	7.7821	0.815932	3.1347	1.1722	2.33	0.86186	1.5581	0.990395	0.974272	2.6863	1.1702	1.7934	0.989998	8.4225	8.3154	3.1706	6.3802	1.7856	3.4955	3.0835	2.1704	4.1854	4.8778
17.3	0.904	2.7226	0.8657	1.0247	1.6794	3.4007	1.7174	7.7654	0.814679	3.1409	1.172	2.3244	0.862441	1.5652	0.990051	0.977913	2.6912	1.1675	1.7953	0.989888	8.4424	8.3251	3.1812	6.4069	1.7882	3.4559	3.0724	2.1431	4.1719	4.8635
17.4	0.9067	2.7342	0.8664	1.0225	1.6825	3.4024	1.7158	7.7698	0.81635	3.1445	1.1709	2.3233	0.865096	1.5766	0.994168	0.978641	2.6899	1.1669	1.7977	0.989009	8.4454	8.3066	3.1878	6.4451	1.7853	3.4979	3.0759	2.1659	4.1603	4.8515
17.5	0.9067	2.736	0.8682	1.0232	1.6848	3.392	1.7214	7.7523	0.815013	3.1481	1.1713	2.3107	0.865013	1.5846	0.987307	0.97767	2.693	1.172	1.8022	0.984392	8.4483	8.3115	3.1982	6.4458	1.7872	3.5122	3.0817	2.1377	4.1506	4.8409
17.6	0.906	2.7455	0.871	1.0251	1.685	3.3769	1.7202	7.7497	0.813341	3.1476	1.1664	2.2956	0.865345	1.5952	0.987307	0.98034	2.6886	1.1724	1.8069	0.982963	8.4165	8.3261	3.2066	6.4603	1.7905	3.4889	3.1113	2.1583	4.1416	4.8326
17.7	0.9033	2.745	0.8691	1.0232	1.6873	3.3805	1.7224	7.7663	0.814093	3.1504	1.1667	2.2888	0.860947	1.5983	0.988679	0.976456	2.682	1.1722	1.807	0.986151	8.4324	8.3095	3.2214	6.4623	1.788	3.511	3.1355	2.1637	4.1348	4.8255
17.8	0.904	2.7459	0.8694	1.0237	1.6893	3.3721	1.7253	7.7541	0.811251	3.1514	1.1655	2.278	0.863934	1.604	0.989708	0.98034	2.68	1.1749	1.8051	0.989009	8.4185	8.3008	3.2421	6.475	1.785	3.4721	3.174	2.139	4.1276	4.8194
17.9	0.9046	2.7483	0.8696	1.0222	1.6875	3.3685	1.7277	7.7506	0.809329	3.1463	1.1625	2.2642	0.864266	1.6118	0.991767	0.978641	2.6749	1.1732	1.8107	0.98769	8.4563	8.3056	3.2445	6.4743	1.7811	3.4828	3.2143	2.1612	4.1194	4.8124
18	0.9047	2.7503	0.8722	1.0242	1.6877	3.3755	1.7286	7.761	0.806403	3.1442	1.1644	2.2588	0.860865	1.6178	0.991767	0.976214	2.6706	1.1733	1.8161	0.989998	8.4473	8.2911	3.2552	6.491	1.7835	3.5002	3.2565	2.1683	4.1133	4.8071
18.1	0.9058	2.7406	0.8759	1.0255	1.6882	3.3721	1.7335	7.7698	0.806988	3.1391	1.163	2.2464	0.861445	1.6231	0.987307	0.977427	2.6633	1.1745	1.8195	0.988019	8.4126	8.3037	3.2683	6.4445	1.7786	3.4712	3.274	2.1879	4.1069	4.8023
18.2	0.9074	2.7404	0.8754	1.0207	1.6865	3.3875	1.7375	7.7384	0.807573	3.1365	1.1596	2.2396	0.863685	1.6255	0.994511	0.979612	2.659	1.1748	1.8244	0.98725	8.4483	8.292	3.2726	6.4637	1.7782	3.4276	3.2916	2.2061	4.1026	4.7962
18.3	0.9045	2.7406	0.8768	1.021	1.683	3.3988	1.7355	7.7436	0.807573	3.1409	1.1593	2.2344	0.859454	1.6299	0.989365	0.981068	2.6511	1.1762	1.8237	0.988459	8.4563	8.3163	3.2823	6.4431	1.7763	3.4473	3.3043	2.2019	4.0959	4.7901
18.4	0.9039	2.7362	0.8744	1.0214	1.6819	3.399	1.7356	7.7471	0.802391	3.1311	1.162	2.2271	0.858707	1.6312	0.989365	0.978883	2.6435	1.1747	1.8278	0.990877	8.4774	8.3163	3.2902	6.4332	1.7789	3.4533	3.3169	2.169	4.0913	4.7845
18.5	0.9032	2.7355	0.8754	1.0221	1.6821	3.4211	1.7372	7.7541	0.805651	3.1317	1.1591	2.2356	0.860616	1.6365	0.982847	0.979612	2.6413	1.1762	1.8278	0.989448	8.4464	8.3017	3.2978	6.4201	1.7792	3.4559	3.3177	2.1644	4.086	4.7775
18.6	0.9054	2.7303	0.875	1.0218	1.6782	3.4379	1.7379	7.768	0.804063	3.1294	1.1583	2.2356	0.859703	1.6354	0.989022	0.977913	2.6361	1.1746	1.8308	0.98736	8.4763	8.2862	3.2959	6.3939	1.776	3.4183	3.3158	2.1975	4.0818	4.771
18.7	0.9031	2.7237	0.8732	1.023	1.6764	3.4419	1.7376	7.775	0.800217	3.1204	1.1582	2.2505	0.859454	1.6339	0.98765	0.975971	2.6325	1.1763	1.8289	0.991317	8.4763	8.2785	3.2962	6.3821	1.7766	3.3774	3.3076	2.1835	4.0793	4.7645
18.8	0.908	2.7221	0.8739	1.0221	1.6785	3.4508	1.7386	7.79	0.800802	3.1161	1.1593	2.2795	0.858707	1.637	0.981475	0.976456	2.6266	1.1786	1.8303	0.992856	8.4553	8.2698	3.291	6.3698	1.7754	3.4013	3.294	2.1267	4.081	4.7572
18.9	0.9095	2.723	0.8771	1.0219	1.6781	3.4648	1.745	7.7575	0.802725	3.1115	1.1577	2.3179	0.85962	1.6411	0.985249	0.980583	2.6299	1.1768	1.8303	0.997472	8.4424	8.2814	3.2935	6.3355	1.7746	3.3613	3.2869	1.9042	4.092	4.752
19	0.91	2.7281	0.8741	1.021	1.6757	3.4628	1.748	7.7584	0.801304	3.1001	1.1568	2.3558	0.859786	1.6388	0.988336	0.980583	2.635	1.1798	1.8351	0.999341	8.4264	8.2824	3.2875	6.3613	1.7707	3.4016	3.2724	1.7143	4.1154	4.7477
19.1	0.9089	2.7316	0.8744	1.0216	1.6752	3.4695	1.7536	7.775	0.798713	3.0943	1.1527	2.3988	0.862524	1.6389	0.986278	0.981796	2.6337	1.1795	1.8318	0.997692	8.4513	8.2717	3.2851	6.3659	1.7769	3.4545	3.2608	1.6956	4.1509	4.7421
19.2	0.9055	2.7428	0.8767	1.0195	1.6745	3.4787	1.7599	7.7786	0.802976	3.0968	1.1548	2.4339	0.859869	1.6372	0.988336	0.979854	2.6422	1.1819	1.8277	1	8.4374	8.2775	3.2875	6.3971	1.778	3.3574	3.2384	1.688	4.1978	4.7378
19.3	0.9068	2.7481	0.8774	1.0179	1.6756	3.4761	1.762	7.7882	0.804731	3.0963	1.1527	2.4775	0.859952	1.633	0.991767	0.980825	2.6488	1.1798	1.8284	0.996703	8.4633	8.2544	3.2769	6.4537	1.7688	3.3864	3.2288	1.8487	4.2494	4.7318
19.4	0.9103	2.7543	0.8762	1.0185	1.6779	3.4767	1.7684	7.7471	0.807741	3.0877	1.1544	2.5003	0.862026	1.6354	0.989708	0.976942	2.6503	1.1804	1.8305	0.989448	8.4784	8.2882	3.2829	6.507	1.7697	3.3802	3.2151	2.0586	4.2988	4.7276
19.5	0.909	2.7636	0.8769	1.0168	1.6828	3.4868	1.7711	7.7759	0.807239	3.0872	1.1518	2.5117	0.862441	1.638	0.988679	0.978155	2.652	1.1817	1.8326	0.988349	8.4613	8.2862	3.2864	6.5664	1.7763	3.3674	3.2024	1.9719	4.3432	4.7263
19.6	0.909	2.7672	0.8761	1.0168	1.681	3.4845	1.775	7.7856	0.805233	3.0875	1.1549	2.5301	0.863851	1.635	0.989708	0.98301	2.6571	1.1828	1.8306	0.978347	8.4603	8.2737	3.2845	6.6432	1.7722	3.4021	3.187	1.8554	4.3785	4.7289
19.7	0.9107	2.7746	0.8775	1.0186	1.6792	3.4961	1.7811	7.7829	0.803645	3.0855	1.1563	2.5435	0.862524	1.6299	0.991424	0.97767	2.6532	1.1809	1.8303	0.970433	8.4473	8.264	3.2937	6.7044	1.7668	3.3881	3.1721	1.9084	4.4041	4.7323
19.8	0.9113	2.784	0.8764	1.0173	1.6781	3.516	1.7819	7.7698	0.805316	3.0817	1.1534	2.5535	0.861611	1.6276	0.986964	0.982282	2.6518	1.1821	1.8317	0.975049	8.4444	8.2669	3.3027	6.7375	1.7751	3.3493	3.1615	1.8681	4.4205	4.7391
19.9	0.9093	2.7945	0.8771	1.0178	1.6797	3.5225	1.783	7.7549	0.804898	3.0837	1.1547	2.5604	0.862109	1.6268	0.985249	0.977184	2.6509	1.1818	1.8339	0.983293	8.4434	8.2467	3.3076	6.7772	1.7748	3.3774	3.1514	1.7596	4.4295	4.7486
20	0.9075	2.8047	0.8769	1.017	1.683	3.5325	1.783	7.741	0.803477	3.089	1.1563	2.5598	0.862607	1.6263	0.987993	0.977913	2.6558	1.1818	1.8344	0.995054	8.4464	8.239	3.3196	6.8072	1.774	3.3988	3.1571	1.6962	4.4319	4.7559
20.1	0.9083	2.814	0.8753	1.0168	1.6843	3.5663	1.7846	7.7558	0.802725	3.0925	1.1597	2.5668	0.862939	1.6243	0.98319	0.979126	2.6535	1.1786	1.8378	0.995494	8.4464	8.2525	3.3281	6.8468	1.7747	3.3521	3.1527	1.6841	4.4303	4.7753
20.2	0.91	2.8238	0.8751	1.0176	1.6832	3.5881	1.7859	7.7488	0.802474	3.0938	1.1645	2.559	0.862773	1.6241	0.983533	0.981553	2.6462	1.1811	1.8353	0.992306	8.4493	8.2285	3.3347	6.8547	1.7775	3.3139	3.1512	1.6859	4.4232	4.7936
20.3	0.9089	2.8336	0.8763	1.0159	1.6828	3.6011	1.7843	7.7445	0.800468	3.0898	1.1714	2.5553	0.8641	1.6206	0.984906	0.980097	2.6452	1.1785	1.8378	0.990877	8.4673	8.2381	3.3529	6.8649	1.7697	3.3886	3.1558	1.6835	4.4119	4.8097
20.4	0.9067	2.8354	0.875	1.0159	1.6843	3.6311	1.7834	7.7523	0.800719	3.0988	1.1765	2.5549	0.862524	1.6156	0.985249	0.983495	2.6384	1.1804	1.8332	0.990547	8.4693	8.265	3.3688	6.8634	1.7725	3.4095	3.1706	1.6735	4.3971	4.8229
20.5	0.9095	2.8469	0.8751	1.0144	1.6811	3.6504	1.7883	7.7724	0.797292	3.1062	1.1749	2.5396	0.863188	1.6126	0.987307	0.980583	2.6293	1.1796	1.8312	0.990547	8.4623	8.2573	3.3929	6.8649	1.772	3.399	3.1914	1.6819	4.3812	4.833
20.6	0.9061	2.8586	0.8741	1.0173	1.6826	3.6593	1.7872	7.7715	0.798546	3.1077	1.1755	2.5171	0.86634	1.6097	0.984906	0.981553	2.6272	1.1804	1.835	0.977028	8.4753	8.2295	3.4271	6.8482	1.7686	3.3954	3.203	1.676	4.3685	4.8383
20.7	0.9067	2.8681	0.8739	1.0176	1.6837	3.6874	1.7931	7.7672	0.798378	3.1105	1.1766	2.5171	0.868415	1.6106	0.987307	0.985922	2.6171	1.1811	1.8345	0.980106	8.4743	8.2467	3.4508	6.8497	1.7678	3.4553	3.2235	1.679	4.3616	4.8423
20.8	0.9085	2.8746	0.873	1.0165	1.6818	3.709	1.7996	7.7891	0.799214	3.1141	1.1805	2.4961	0.872563	1.6121	0.983533	0.984223	2.6108	1.1821	1.8347	0.992965	8.4954	8.2467	3.4744	6.8482	1.774	3.4447	3.2485	1.6778	4.3631	4.8431
20.9	0.9068	2.8921	0.875	1.0143	1.6846	3.709	1.8057	7.79	0.802725	3.1199	1.1845	2.4853	0.871401	1.6074	0.985592	0.983738	2.6072	1.1825	1.8399	0.982304	8.4944	8.2438	3.5037	6.8294	1.773	3.4055	3.2721	1.6806	4.3739	4.8418
21	0.9065	2.9024	0.8749	1.0144	1.6796	3.7199	1.8139	7.7619	0.804313	3.1212	1.1858	2.4706	0.874222	1.6073	0.992453	0.983738	2.5976	1.1815	1.8344	0.989558	8.4924	8.2717	3.521	6.8122	1.7681	3.3999	3.2921	1.677	4.3917	4.8365
21.1	0.9081	2.9036	0.873	1.0148	1.6806	3.7332	1.8226	7.7926	0.804146	3.1255	1.1873	2.4543	0.87696	1.6048	0.989708	0.985437	2.5916	1.1811	1.8333	0.982084	8.4784	8.2756	3.5363	6.8151	1.7743	3.5295	3.3051	1.675	4.4127	4.8304
21.2	0.9115	2.9182	0.8745	1.0149	1.6775	3.7268	1.8296	7.7619	0.810248	3.1191	1.186	2.4371	0.878868	1.6036	0.98765	0.98835	2.5858	1.1817	1.8342	0.979006	8.5227	8.2814	3.5565	6.7964	1.776	3.6391	3.3166	1.6774	4.4338	4.8224
21.3	0.9054	2.9251	0.8718	1.0149	1.6767	3.7366	1.8373	7.7619	0.810917	3.1278	1.1862	2.4207	0.877956	1.6057	0.989708	0.984466	2.5823	1.1848	1.835	0.979006	8.4974	8.2689	3.5693	6.7857	1.7769	3.6397	3.3202	1.685	4.4519	4.8137
21.4	0.9099	2.9348	0.8748	1.0146	1.6771	3.7423	1.8446	7.7786	0.811251	3.1255	1.1886	2.4055	0.878205	1.602	0.989365	0.984223	2.5761	1.1845	1.8341	0.963948	8.5287	8.3066	3.5746	6.7615	1.7889	3.659	3.327	1.6814	4.4662	4.8062
21.5	0.9082	2.9279	0.8738	1.0177	1.6807	3.7303	1.8553	7.7558	0.841762	3.136	1.1844	2.4049	0.882768	1.5996	0.987993	0.982039	2.5689	1.1854	1.836	0.976039	8.5379	8.3231	3.5845	6.7452	1.8006	3.7027	3.3177	1.6915	4.4761	4.7958
21.6	0.91	2.9069	0.8755	1.0168	1.6679	3.7341	1.8625	7.7654	0.970994	3.1437	1.1856	2.3999	0.877956	1.5992	0.985592	0.986893	2.5658	1.1864	1.8384	0.982634	8.5075	8.327	3.5966	6.7016	1.817	3.713	3.3087	1.676	4.4805	4.7849
21.7	0.9075	2.8549	0.8785	1.0152	1.6186	3.7398	1.867	7.7847	0.968821	3.1404	1.1825	2.3953	0.877209	1.5978	0.991081	0.988592	2.5625	1.1869	1.8414	0.967685	8.5348	8.3319	3.5987	6.6772	1.8253	3.689	3.3084	1.6894	4.4801	4.7732
21.8	0.9061	2.8391	0.8774	1.0142	1.596	3.73	1.8699	7.7619	0.89083	3.1535	1.18	2.3953	0.871567	1.5993	0.989365	0.983738	2.5553	1.1849	1.8446	0.970103	8.4974	8.3407	3.6008	6.6452	1.8379	3.7335	3.3163	1.6786	4.4753	4.7606
21.9	0.906	2.8448	0.8775	1.0144	1.5914	3.718	1.8754	7.7584	0.817103	3.1574	1.1787	2.3953	0.866008	1.5992	0.982504	0.985194	2.5508	1.1853	1.8455	0.984062	8.5176	8.3427	3.6126	6.6301	1.8523	3.7052	3.3155	1.6804	4.4666	4.7481
22	0.9096	2.8473	0.8769	1.0133	1.6003	3.7234	1.879	7.7619	0.811084	3.1636	1.1796	2.3959	0.863519	1.6031	0.985249	0.985194	2.5537	1.1831	1.8491	0.98736	8.5308	8.3368	3.615	6.6328	1.866	3.7294	3.3169	1.6866	4.4539	4.7383
22.1	0.9093	2.854	0.8777	1.0135	1.6016	3.7259	1.8807	7.7602	0.816267	3.1721	1.1787	2.4026	0.867502	1.5972	0.984563	0.98932	2.5549	1.1839	1.8574	0.990437	8.5075	8.3672	3.6241	6.5862	1.8711	3.795	3.3207	1.6883	4.4381	4.7297
22.2	0.9078	2.8612	0.88	1.012	1.6004	3.714	1.9285	7.7506	0.928362	3.1706	1.1787	2.4015	0.862358	1.6013	0.98422	0.990291	2.5572	1.1835	1.8616	0.992746	8.547	8.3711	3.6418	6.5793	1.8782	3.7934	3.3331	1.6836	4.4201	4.7216
22.3	0.9101	2.8549	0.8784	1.0111	1.5999	3.7008	1.9526	7.7742	0.841093	3.1701	1.1775	2.398	0.8641	1.5984	0.989365	0.988592	2.5637	1.183	1.8658	0.990218	8.5176	8.3829	3.6605	6.561	1.8894	3.7474	3.3364	1.6829	4.3995	4.7148
22.4	0.907	2.8543	0.8757	1.0126	1.6112	3.6859	1.9526	7.7488	0.808576	3.1688	1.1825	2.4034	0.860201	1.5982	0.984906	0.987621	2.5687	1.1828	1.8714	0.985711	8.5176	8.4007	3.6846	6.5285	1.8965	3.7693	3.3328	1.6808	4.3781	4.7071
22.5	0.9096	2.8547	0.8749	1.0133	1.6225	3.6797	1.9521	7.7479	0.836329	3.1682	1.1809	2.3944	0.859537	1.6024	0.982504	0.98932	2.5715	1.1831	1.8773	0.982853	8.5358	8.4126	3.7055	6.5366	1.8939	3.7882	3.343	1.6859	4.357	4.699
22.6	0.9506	2.8823	0.8714	1.0127	1.6395	3.6726	1.9499	7.7323	0.927359	3.1662	1.1773	2.3877	0.860201	1.598	0.97187	0.987136	2.5794	1.1827	1.8819	0.976478	8.5166	8.4126	3.7221	6.503	1.8956	3.8812	3.3284	1.6806	4.334	4.6923
22.7	0.9623	2.8788	0.8636	1.0111	1.6391	3.6648	1.948	7.7323	0.879629	3.1659	1.1803	2.3881	0.860284	1.6001	0.975986	0.98568	2.5792	1.1826	1.8848	0.97428	8.5105	8.4066	3.7357	6.4796	1.9039	3.9071	3.3331	1.6741	4.3131	4.683
22.8	0.9151	2.8533	0.8689	1.011	1.6812	3.6544	1.9399	7.7742	0.815765	3.1605	1.177	2.3888	0.859952	1.5968	0.981475	0.989563	2.6029	1.1829	1.89	0.972412	8.5196	8.4116	3.7433	6.4997	1.9366	3.9548	3.3295	1.6739	4.292	4.6754
22.9	0.9243	2.8626	0.8734	1.01	1.6843	3.644	1.9285	7.7532	0.824877	3.1563	1.1776	2.3787	0.859786	1.5948	0.977702	0.986408	2.6026	1.1832	1.89	0.972961	8.5237	8.3957	3.7518	6.5057	1.9567	3.9817	3.3254	1.6873	4.2755	4.6695
23	0.9634	2.87	0.8769	1.0114	1.6854	3.6366	1.93	7.761	0.888322	3.1538	1.1737	2.3806	0.859869	1.5987	0.99211	0.989806	2.6167	1.1845	1.8881	0.972741	8.4924	8.4135	3.7594	6.489	1.9589	4.0293	3.3106	1.7054	4.2616	4.6653
23.1	0.9241	2.8582	0.8821	1.0107	1.6877	3.6211	1.9263	7.7436	0.918499	3.1468	1.178	2.3707	0.85821	1.5967	0.995197	0.992233	2.6488	1.182	1.8906	0.972851	8.5136	8.4076	3.7735	6.5238	1.9581	4.1151	3.2983	1.6715	4.2494	4.6602
23.2	0.9196	2.8563	0.8806	1.0101	1.6865	3.5972	1.9259	7.7602	0.918081	3.1417	1.1774	2.3536	0.859952	1.5986	0.994168	0.986893	2.643	1.1806	1.8947	0.980325	8.5287	8.3938	3.7863	6.5529	1.9542	4.1774	3.2748	1.9397	4.2382	4.6544
23.3	0.9711	2.8577	0.8839	1.0101	1.6706	3.5803	1.926	7.7488	0.931873	3.1406	1.1736	2.3494	0.859703	1.5962	1	0.989806	2.638	1.1845	1.8933	0.989558	8.5663	8.4066	3.7937	6.617	1.9353	4.1835	3.2656	2.2387	4.2275	4.6494
23.4	0.9805	2.8672	0.8804	1.011	1.6229	3.572	1.922	7.7707	0.934883	3.135	1.1727	2.3421	0.860616	1.593	0.997599	0.991262	2.6348	1.1838	1.8947	0.991097	8.5379	8.3997	3.804	6.6751	1.9005	4.2084	3.2573	2.2464	4.2183	4.6427
23.5	0.9811	2.8723	0.886	1.01	1.6383	3.5657	1.9145	7.7689	0.917161	3.1378	1.1719	2.3309	0.863022	1.5958	0.99554	0.990291	2.645	1.182	1.8959	0.986371	8.5015	8.3701	3.8163	6.689	1.8886	4.2066	3.2373	2.2399	4.2088	4.6385
23.6	0.9764	2.8714	0.9012	1.0082	1.6861	3.541	1.8778	7.7453	0.899273	3.1278	1.1732	2.3216	0.865013	1.596	0.986621	0.989078	2.6139	1.1825	1.8976	0.945812	8.5277	8.377	3.8267	6.741	1.881	4.2958	3.2219	2.2735	4.2	4.6381
23.7	0.9739	2.8704	0.9102	1.0079	1.7104	3.5195	1.9004	7.7803	0.871855	3.1248	1.1743	2.3122	0.867585	1.5937	0.972213	0.987379	2.575	1.182	1.8972	0.918334	8.5338	8.3809	3.8548	6.7879	1.8711	4.3082	3.2135	2.2584	4.1912	4.6352
23.8	0.9774	2.8779	0.916	1.0071	1.7122	3.5084	1.8936	7.7698	0.858146	3.1253	1.1713	2.3051	0.871401	1.5909	0.967067	0.99199	2.5719	1.1829	1.8975	0.898769	8.5257	8.3938	3.864	6.8122	1.867	4.2561	3.204	2.2324	4.1821	4.6335
23.9	0.9804	2.8898	0.9266	1.0072	1.7015	3.4979	1.8685	7.7935	0.848282	3.1199	1.1709	2.3005	0.873641	1.5906	0.958834	0.991748	2.5792	1.183	1.8956	0.886239	8.5277	8.3869	3.8841	6.8417	1.8696	4.309	3.1948	2.2239	4.1737	4.6339
24	0.9874	2.8849	0.926	1.008	1.6924	3.4903	1.892	7.7926	0.843768	3.1194	1.1728	2.2886	0.877126	1.5889	0.953002	0.987621	2.6158	1.182	1.8968	0.880853	8.5399	8.3544	3.8924	6.8424	1.8699	4.315	3.182	2.2176	4.1643	4.6393
24.1	0.9959	2.8828	0.9245	1.011	1.6873	3.4799	1.9138	7.8217	0.851459	3.1166	1.1753	2.2848	0.883266	1.5904	0.953002	0.991505	2.6397	1.1817	1.8985	0.883161	8.5796	8.3869	3.9091	6.8598	1.8652	4.2965	3.1753	2.2067	4.1563	4.6569
24.2	0.9967	2.8793	0.9224	1.0105	1.6979	3.4706	1.9115	7.8306	0.86174	3.1146	1.1731	2.2711	0.884261	1.5873	0.958148	0.992718	2.6333	1.1811	1.8938	0.88426	8.5765	8.3849	3.9275	6.8707	1.8624	4.3063	3.1682	2.2253	4.1491	4.6859
24.3	0.9866	2.8846	0.9188	1.0089	1.7345	3.4539	1.9015	7.827	0.863579	3.1097	1.1699	2.2769	0.887663	1.5887	0.955403	0.991262	2.6352	1.1794	1.8958	0.88437	8.6433	8.3691	3.943	6.8605	1.8621	4.2961	3.1628	2.2157	4.1416	4.728
24.4	0.9795	2.8772	0.9111	1.0063	1.775	3.4382	1.8898	7.8306	0.864415	3.1059	1.1677	2.2693	0.892724	1.5923	0.962264	0.99466	2.5887	1.1784	1.8972	0.882502	8.7151	8.3456	3.9565	6.8526	1.8577	4.2811	3.1579	2.203	4.1348	4.7823
24.5	0.9759	2.8716	0.9065	1.0061	1.7812	3.4256	1.8798	7.827	0.866505	3.1102	1.173	2.2563	0.892226	1.5856	0.95952	0.992476	2.5388	1.1779	1.9025	0.88437	8.7382	8.3544	3.9674	6.8591	1.8562	4.2687	3.1532	2.2054	4.1279	4.8445
24.6	0.9741	2.8702	0.9132	1.0039	1.783	3.4052	1.8633	7.8297	0.872273	3.1054	1.1683	2.2552	0.894881	1.5859	0.964666	0.991505	2.573	1.1769	1.9011	0.883931	8.713	8.3632	3.9718	6.8729	1.8526	4.3371	3.1486	2.2175	4.1194	4.9091
24.7	0.9658	2.8646	0.9308	1.0042	1.7707	3.3872	1.8557	7.827	0.87896	3.0988	1.1703	2.2514	0.896955	1.5871	0.970497	0.990049	2.6228	1.1789	1.9025	0.88404	8.6651	8.3741	3.9753	6.8787	1.8508	4.3758	3.1414	2.1982	4.1169	4.974
24.8	0.9712	2.8635	0.9321	1.0043	1.7708	3.3819	1.842	7.8475	0.879294	3.1037	1.1692	2.2406	0.899776	1.5879	0.974271	0.992961	2.6289	1.1776	1.9039	0.882612	8.6776	8.3642	3.977	6.8801	1.8545	4.3375	3.1396	2.2281	4.1312	5.0322
24.9	0.957	2.8691	0.9368	1.0053	1.7738	3.3732	1.8327	7.8439	0.880298	3.1019	1.1693	2.2378	0.900772	1.5926	0.980789	0.994417	2.6173	1.1776	1.905	0.881622	8.6454	8.375	3.9845	6.8882	1.8415	4.334	3.1432	2.2258	4.1723	5.0747
25	0.9365	2.8774	0.9416	1.008	1.7707	3.3677	1.8234	7.876	0.880966	3.1057	1.1686	2.2299	0.899278	1.5904	0.990395	0.990534	2.6175	1.1784	1.9053	0.882282	8.6974	8.379	3.9831	6.9417	1.8457	4.3593	3.1476	2.1769	4.2408	5.1097
25.1	0.9344	2.8825	0.9433	1.0583	1.7484	3.3627	1.8204	7.8867	0.88105	3.1067	1.1674	2.2292	0.899029	1.6052	0.987307	0.990777	2.6301	1.1774	1.9058	0.882172	8.6848	8.3957	3.9776	6.9952	1.8493	4.362	3.1429	2.131	4.3321	5.1383
25.2	0.9356	2.893	0.9447	1.069	1.7371	3.3543	1.8311	7.859	0.874195	3.1085	1.1708	2.2194	0.90102	1.6415	0.985249	0.99199	2.632	1.177	1.9078	0.877446	8.6744	8.3938	3.964	7.0139	1.84	4.3048	3.1496	2.1713	4.435	5.1571
25.3	0.9354	2.9041	0.9456	1.0728	1.7349	3.3419	1.8197	7.893	0.871771	3.1097	1.1672	2.2143	0.897536	1.6479	0.981475	0.990049	2.6284	1.1731	1.9061	0.880963	8.6495	8.4284	3.9383	7.0522	1.8402	4.3451	3.154	2.1746	4.5399	5.1681
25.4	0.9366	2.9222	0.9941	1.075	1.7325	3.3314	1.7926	7.8912	0.866254	3.1202	1.1675	2.213	0.897287	1.6414	0.972556	0.98932	2.6367	1.1736	1.9048	0.881732	8.6994	8.4284	3.9315	7.0507	1.8426	4.3181	3.1519	2.167	4.636	5.171	2.95122
25.5	0.9386	2.9353	1.027	1.0788	1.7382	3.3251	1.7801	7.8849	0.862493	3.1202	1.1674	2.2079	0.899859	1.629	0.974271	0.988592	2.6333	1.167	1.907	0.883491	8.7068	8.4165	3.9201	7.0712	1.8452	4.3589	3.154	2.19	4.702	5.1686	2.95606
25.6	0.9424	2.9327	1.0438	1.0804	1.7489	3.3141	1.786	7.8823	0.868929	3.1263	1.1685	2.204	0.896955	1.6152	0.981475	0.991262	2.6322	1.1672	1.9051	0.880193	8.754	8.4464	3.8954	7.1085	1.8472	4.3913	3.1558	2.1984	4.7464	5.1619	2.96244
25.7	0.9433	2.936	1.0482	1.0815	1.7669	3.3106	1.7872	7.9029	0.878291	3.1327	1.1696	2.198	0.897619	1.6439	0.976672	0.993447	2.6407	1.1686	1.9019	0.882612	8.7741	8.4473	3.8726	7.1062	1.8442	4.4104	3.1519	2.203	4.781	5.146	2.96658
25.8	0.9453	2.9293	1.0496	1.0797	1.7645	3.3051	1.8145	7.8849	0.890412	3.136	1.1693	2.194	0.901518	1.6488	0.976329	0.993689	2.6462	1.1701	1.9036	0.883381	8.7488	8.4264	3.8571	7.1093	1.8396	4.4068	3.1514	2.1952	4.8045	5.1269	2.96507
25.9	0.9455	2.9374	1.0499	1.0808	1.7883	3.3016	1.8128	7.893	0.908551	3.1383	1.1701	2.1896	0.906745	1.6294	0.985935	0.990777	2.6405	1.167	1.9048	0.88448	8.7678	8.4723	3.8404	7.1162	1.8429	4.4096	3.1486	2.1828	4.8181	5.104	2.96761
26	0.9481	2.9424	1.049	1.0799	1.801	3.3054	1.7808	7.8706	0.977514	3.1347	1.17	2.1887	0.907409	1.6414	0.982847	0.986893	2.6384	1.1694	1.9002	0.882721	8.753	8.4763	3.8189	7.1123	1.842	4.4686	3.1527	2.1411	4.8132	5.0809	2.96721
26.1	0.9465	2.9455	1.0519	1.084	1.8111	3.31	1.7582	7.8921	1	3.1401	1.1626	2.1865	0.908156	1.6461	0.98422	0.98932	2.6325	1.1717	1.8984	0.883711	8.7572	8.4703	3.804	7.0948	1.8472	4.4002	3.145	2.1666	4.808	5.0583	2.96514
26.2	0.9496	2.9424	1.0509	1.0851	1.8163	3.3128	1.7533	7.8894	0.95043	3.1306	1.1615	2.179	0.911972	1.6462	0.985592	0.990049	2.6257	1.1721	1.8985	0.883381	8.8049	8.4954	3.7934	7.1016	1.847	4.4381	3.1527	2.1908	4.808	5.0373	2.9668
26.3	0.9491	2.9412	1.0508	1.0819	1.8116	3.3057	1.7572	7.9065	0.747304	3.1327	1.1621	2.1772	0.915457	1.6376	0.986621	0.993689	2.6253	1.1677	1.8924	0.881622	8.8134	8.5025	3.7773	7.0765	1.8414	4.5525	3.1512	2.1713	4.808	5.0141	2.96106
26.4	0.95	2.9465	1.0357	1.082	1.8151	3.2905	1.7554	7.9038	0.530803	3.1393	1.1641	2.1709	0.912636	1.6291	0.982161	0.991505	2.6221	1.1593	1.892	0.882612	8.7889	8.4995	3.776	7.0773	1.8393	4.5618	3.1504	2.1749	4.8076	4.991	2.95074
26.5	0.9532	2.9515	0.9697	1.079	1.8216	3.2948	1.7543	7.8697	0.446794	3.136	1.169	2.168	0.917033	1.6174	0.977702	0.991505	2.6133	1.1614	1.8891	0.880413	8.773	8.4874	3.7537	7.0545	1.8342	4.4753	3.1422	2.1708	4.7953	4.9681	2.9372
26.6	0.9532	2.9628	0.9461	1.0871	1.7966	3.2994	1.7496	7.8688	0.439522	3.1296	1.1659	2.1659	0.96308	1.5612	0.987307	0.990534	2.5997	1.1602	1.8878	0.883051	8.7805	8.4924	3.7569	7.0244	1.8378	4.463	3.1563	2.1744	4.7801	4.9471	2.93368
26.7	0.9513	2.9857	0.9465	1.0878	1.8013	3.2948	1.7385	7.8751	0.437599	3.1268	1.1637	2.158	0.998424	1.4762	0.989365	0.989806	2.6066	1.1611	1.8897	0.880303	8.8038	8.4944	3.7575	7.0011	1.8345	4.5185	3.1792	2.0075	4.7602	4.928	2.92811
26.8	0.9523	2.9767	0.9614	1.0469	1.8175	3.2772	1.7334	7.8849	0.485079	3.1222	1.164	2.1604	0.999004	1.3909	0.985592	0.99466	2.5862	1.1619	1.8842	0.877556	8.7921	8.4924	3.7696	7.0049	1.84	4.5173	3.1993	1.9335	4.7357	4.91	2.92189
26.9	0.9972	2.9697	1.0088	1.0225	1.8344	3.2826	1.728	7.9002	0.593413	3.1161	1.1663	2.1552	0.997594	0.761	0.984563	0.995631	2.5396	1.1638	1.8862	0.881622	8.8273	8.4904	3.77	6.9803	1.8402	4.4634	3.2341	1.9518	4.7084	4.8934	2.90479
27	1.0336	2.9925	1.038	1.0254	1.8618	3.2832	1.7169	7.9155	0.460921	3.1141	1.1657	2.1526	1	0.0844	0.983533	0.990777	2.5317	1.1617	1.8858	0.879314	8.8391	8.5267	3.7776	6.9358	1.8357	4.5101	3.2694	2.0325	4.6792	4.8773	2.88536
27.1	0.9852	3.0245	1.0267	1.0278	1.8675	3.2702	1.7153	7.8975	0.479395	3.111	1.1688	2.1505	0.994358	0.0429	0.980446	0.993932	2.5341	1.1631	1.8877	0.879974	8.8595	8.5328	3.7911	6.9299	1.8295	4.4805	3.3049	2.102	4.6485	4.8631	2.88476
27.2	0.9925	3.0287	1.0257	1.0806	1.8792	3.2681	1.7134	7.8769	0.626933	3.111	1.1668	2.1488	0.995354	0.0408	0.980789	0.996359	2.5384	1.1644	1.8884	0.878435	8.8028	8.548	3.7892	6.9211	1.8312	4.4932	3.343	2.131	4.6165	4.8498	2.89091
27.3	1.0345	3.0697	1.0464	1.0958	1.886	3.2718	1.7075	7.8876	0.668311	3.1174	1.169	2.1462	0.992865	0.0414	0.988679	0.995388	2.5418	1.1638	1.8901	0.876456	8.7762	8.5745	3.7882	6.9028	1.8306	4.394	3.3802	2.1668	4.5831	4.8378	2.89416
27.4	1.0136	3.1388	1.0508	1.0987	1.8949	3.2635	1.6976	7.8581	0.668979	3.1186	1.1689	2.1368	0.990957	0.0407	0.982847	1	2.5488	1.1633	1.892	0.877556	8.8081	8.5847	3.7876	6.8823	1.8309	4.45	3.4072	2.1758	4.5505	4.8251	2.89692
27.5	0.9784	3.1664	1.0147	1.1013	1.8979	3.2506	1.6799	7.8671	0.652846	3.1082	1.1705	2.1397	0.98797	0.0382	0.986964	0.999757	2.5516	1.164	1.8962	0.878655	8.8713	8.5847	3.7943	6.8772	1.826	4.4026	3.414	2.1421	4.5181	4.8132	2.89248
27.6	0.9644	3.1951	0.989	1.098	1.9085	3.252	1.673	7.8466	0.621834	3.111	1.1696	2.1404	0.988468	0.0362	0.984906	0.994175	2.5516	1.1649	1.8978	0.878655	8.8455	8.6268	3.7889	6.8518	1.8262	4.4197	3.4248	2.1526	4.4869	4.8049	2.88981
27.7	0.949	3.2035	0.9861	1.0989	1.9176	3.2555	1.6861	7.8537	0.549444	3.1082	1.1734	2.1416	0.98938	0.0373	0.988679	0.993447	2.5559	1.1643	1.8984	0.876786	8.8541	8.632	3.7815	6.8201	1.8259	4.3913	3.4333	2.1375	4.4567	4.7966	2.88521
27.8	0.8955	3.1993	1.0009	1.0944	1.9363	3.2432	1.6823	7.8635	0.579453	3.111	1.1713	2.1457	0.985398	0.0371	0.983877	0.992233	2.5608	1.1637	1.9042	0.877116	8.8713	8.6196	3.7709	6.8086	1.8225	4.3497	3.4313	2.1751	4.4283	4.7879	2.88308
27.9	0.871	3.1909	0.9722	1.0946	1.9461	3.2333	1.6657	7.8715	0.647162	3.1133	1.1743	2.155	0.956111	0.0349	0.991767	0.991262	2.5627	1.1643	1.9059	0.877336	8.8961	8.6537	3.7623	6.8022	1.8252	4.3936	3.4362	2.159	4.4014	4.7792	2.88427
28	0.8827	3.1612	0.9407	1.1017	1.9319	3.2357	1.6514	7.8867	0.65736	3.1146	1.1744	2.168	0.897121	0.0352	0.991767	0.993932	2.5619	1.1672	1.9091	0.877995	8.8541	8.6289	3.7467	6.7474	1.8222	4.3716	3.429	2.123	4.3758	4.771	2.87368
28.1	0.896	3.1381	1.0063	1.1134	1.8854	3.2365	1.6514	7.775	0.660787	3.1324	1.174	2.2194	0.89878	0.0352	0.983877	0.995631	2.5582	1.167	1.9128	0.878325	8.9243	8.6599	3.7426	6.7382	1.8213	4.3333	3.4236	2.1716	4.3528	4.7641	2.87501
28.2	0.9301	3.113	1.0372	1.1199	1.8624	3.236	1.5897	7.7063	0.662543	3.1447	1.1746	2.2324	0.950967	0.0358	0.991081	0.994175	2.5641	1.1684	1.9144	0.876676	8.853	8.6382	3.7328	6.7163	1.8179	4.3812	3.403	2.1538	4.3325	4.7568	2.86966
28.3	0.9238	3.0895	1.0462	1.1219	1.8041	3.2307	1.5461	7.7071	0.487921	3.1489	1.1772	2.2433	0.968804	0.0369	0.986278	0.991505	2.5629	1.1668	1.9173	0.877556	8.9026	8.6361	3.7243	6.6946	1.8191	4.2531	3.394	2.1493	4.3135	4.7499	2.85571
28.4	0.8907	3.0908	1.0395	1.1222	1.0526	3.2169	1.5293	7.7089	0.0673744	3.1574	1.1824	2.2594	0.974612	0.0371	0.99211	0.993689	2.5668	1.1675	1.9192	0.878435	8.8842	8.6413	3.7143	6.6883	1.8191	4.2803	3.3836	2.1483	4.2969	4.7439	2.8149
28.5	0.8809	3.126	1.0097	1.1195	0.8638	3.2135	1.5788	7.7149	0.0383683	3.1779	1.181	2.2731	0.980171	0.0394	0.989708	0.98932	2.5687	1.1656	1.922	0.878765	8.8918	8.6516	3.7049	6.6876	1.8201	4.298	3.3744	2.1644	4.2822	4.7383	2.81081
28.6	0.9098	3.1867	1.0023	1.1227	0.7182	3.2225	1.6269	7.6744	0.0382011	3.1862	1.1857	2.2879	0.981581	0.0407	0.989022	0.991262	2.5701	1.1684	1.9229	0.878874	8.9505	8.634	3.6815	6.6688	1.8159	4.3455	3.3549	2.1407	4.2687	4.7323	2.8099
28.7	0.9006	3.0545	0.9737	1.1209	0.5531	3.213	1.7	7.6769	0.0361949	3.1993	1.1817	2.2892	0.98266	0.0429	0.981475	0.994417	2.5732	1.1689	1.9217	0.878325	8.9232	8.6589	3.6713	6.6577	1.8156	4.3543	3.34	2.1332	4.2561	4.7259	2.7993
28.8	0.884	2.9125	0.9742	1.1136	0.5517	3.2108	1.762	7.6787	0.0300928	3.2185	1.1855	2.2532	0.982162	0.0435	0.985249	0.99466	2.5841	1.1664	1.9255	0.876346	8.9385	8.6351	3.6581	6.6751	1.8154	4.2796	3.3289	1.8563	4.2445	4.7195	2.78279
28.9	0.9182	2.9308	0.98	1.1137	0.5322	3.2164	1.7805	7.6726	0.0224024	3.2222	1.188	2.2127	0.982494	0.0415	0.985935	0.991262	2.5837	1.1688	1.9274	0.877556	8.9059	8.6227	3.6528	6.703	1.8194	4.2882	3.3073	1.8054	4.2338	4.7122	2.77997
29	0.9765	2.8619	0.9825	1.0881	0.5286	3.203	1.7805	7.6589	0.0184736	3.2217	1.1876	2.2005	0.979175	0.0398	0.980103	0.989563	2.5862	1.1692	1.924	0.875687	8.9211	8.6103	3.6403	6.7587	1.8145	4.2931	3.2981	1.8906	4.2238	4.7067	2.78031
29.1	0.9695	2.8219	0.9943	1.082	0.5301	3.2069	1.7673	7.6881	0.0130402	3.2285	1.1879	2.2283	0.981167	0.0405	0.986621	0.99199	2.5941	1.1712	1.9283	0.878215	8.9603	8.598	3.6345	6.7893	1.8104	4.2841	3.2926	1.9209	4.2154	4.7029	2.78328
29.2	0.962	3.0463	0.9499	1.0883	0.5304	3.213	1.7409	7.7821	0.0109504	3.2373	1.186	2.2717	0.977682	0.0403	0.989708	0.98932	2.6014	1.17	1.9246	0.878545	8.9189	8.596	3.6232	6.8743	1.8159	4.2943	3.2853	1.9115	4.2069	4.6978	2.79382
29.3	0.9348	3.2389	0.8252	1.0797	0.5335	3.1988	1.7104	7.7953	0.0100309	3.2291	1.1846	2.2987	0.973782	0.0403	0.981818	0.992961	2.6062	1.172	1.9305	0.876456	8.8918	8.6011	3.6108	6.9521	1.8145	4.2419	3.281	1.8839	4.1996	4.6914	2.7927
29.4	0.8333	3.2905	0.9351	1.0833	0.535	3.2043	1.672	7.8032	0.00994734	3.2312	1.1873	2.3502	0.973368	0.0401	0.988679	0.992233	2.6112	1.172	1.9276	0.877336	8.945	8.5939	3.6102	7.0304	1.816	4.2579	3.2732	1.8793	4.193	4.6859	2.80009
29.5	0.8053	3.3057	1.0456	1.0907	0.6304	3.2072	1.7011	7.7253	0.00986375	3.2376	1.1873	2.3894	0.982411	0.0394	0.993139	0.99466	2.6083	1.1706	1.9304	0.874698	8.9483	8.5714	3.5969	7.1415	1.817	4.3363	3.2815	1.8988	4.1872	4.6787	2.81289
29.6	0.9093	3.3948	1.0229	1.0947	0.7263	3.1917	1.7622	7.7812	0.00978016	3.2296	1.1879	2.3972	0.991206	0.0365	0.989022	0.98835	2.6131	1.1727	1.9316	0.873599	8.9167	8.5806	3.5887	7.2121	1.8176	4.3033	3.2921	1.9162	4.1806	4.6754	2.82623
29.7	0.9466	3.4302	0.9933	1.086	0.73	3.1961	1.7863	7.8164	0.00961297	3.2315	1.1873	2.3858	0.992865	0.0359	0.986278	0.98932	2.6121	1.1722	1.935	0.87228	8.933	8.5612	3.5851	7.283	1.8114	4.4061	3.3106	1.8918	4.1748	4.6699	2.83407
29.8	0.3493	3.4279	0.8441	1.088	0.7319	3.1972	1.7981	7.7166	0.00969656	3.2177	1.1847	2.3698	0.990127	0.0365	0.985592	0.990534	2.6162	1.1717	1.938	0.870411	8.9124	8.5643	3.5725	7.3356	1.8101	4.3493	3.3386	1.8936	4.1697	4.6649	2.80484
29.9	0.4456	3.4502	0.7977	1.0933	0.7302	3.1849	1.8047	7.7132	0.00961297	3.2127	1.1851	2.3378	0.98266	0.0356	0.993825	0.993689	2.6198	1.172	1.9399	0.873049	8.881	8.5551	3.5645	7.3848	1.8084	4.2905	3.3688	1.9254	4.1654	4.6602	2.80599
30	0.461	3.4796	0.7981	1.1025	0.7288	3.194	1.794	7.6095	0.00961297	3.2161	1.1856	2.3098	0.975359	0.0356	0.993482	0.995631	2.6257	1.1698	1.9454	0.889206	8.9222	8.5602	3.5541	7.4165	1.8091	4.3048	3.4115	1.7692	4.1614	4.6544	2.80274
