# Supplementary material for: The Monty Hall problem revisited: Autonomic arousal in an inverted version of the game
Source: PLoS One. 2018 Mar 26;13(3):e0192542. doi: 10.1371/journal.pone.0192542 (PMC5868764; doi:10.1371/journal.pone.0192542)
Supplement: S2 Table — (XLSX) [file pone.0192542.s002.xlsx]

## Sheet: Plan1
Table S2. Crude data of skin conductance of each participant in the inverted version of the MHG.
Time [s]	P2	P4	P6	P8	P10	P12	P14	P16	P18	P20	P22	P24	P26	P28	P30	P32	P34	P36	P38	P40	P42	P44	P46	P48	P50	P52	P54	P56	P58	P60
0	0.8891	0.9139	3.7895	1.1825	0.6763	2.7267	2.883	1.2858	1.0509	5.0588	0.7833	0.9599	0.6242	3.2278	1.3502	2.3812	2.4746	2.0629	1.017	0.912571	1.5187	2.3051	4.0373	2.0231	2.0361	3.2227	1.3207	4.2264	3.9756	3.9756
0.1	0.8876	0.9139	3.7889	1.1812	0.6757	2.7232	2.9074	1.2876	1.0462	5.0719	0.7809	0.9638	0.6242	3.2188	1.3484	2.3734	2.4704	2.0578	1.0193	0.910949	1.5262	2.3033	4.0327	2.0193	2.0402	3.2148	1.3208	4.2216	3.9999	3.9999
0.2	0.8884	0.9147	3.7866	1.1831	0.6767	2.7428	2.9377	1.2897	1.0475	5.0733	0.7833	0.9633	0.625	3.2174	1.3531	2.3789	2.4708	2.0525	1.0193	0.913706	1.5288	2.3011	4.03	2.0177	2.0468	3.2082	1.3223	4.2235	4.0307	4.0307
0.3	0.8876	0.9165	3.7873	1.1806	0.6781	2.7391	2.9767	1.2929	1.0487	5.0893	0.78	0.9691	0.6234	3.223	1.3566	2.3774	2.4696	2.0483	1.0202	0.912409	1.534	2.2987	4.0272	2.0163	2.0555	3.1995	1.324	4.2235	4.0656	4.0656
0.4	0.8888	0.9157	3.786	1.1819	0.6751	2.7512	3.0167	1.2937	1.0476	5.0979	0.7821	0.9704	0.625	3.2106	1.3557	2.3821	2.4686	2.0463	1.0212	0.911273	1.54	2.2985	4.0251	2.0163	2.0605	3.1912	1.3273	4.2224	4.1005	4.1005
0.5	0.8859	0.9173	3.778	1.1835	0.6755	2.751	3.0614	1.2931	1.0455	5.1126	0.786	0.9723	0.6266	3.2079	1.3562	2.3848	2.47	2.0428	1.0221	0.911436	1.5422	2.2972	4.021	2.0159	2.0641	3.1838	1.3316	4.2249	4.134	4.134
0.6	0.8866	0.9138	3.7866	1.1853	0.6741	2.7572	3.1075	1.2971	1.046	5.1145	0.783	0.9733	0.6271	3.1883	1.3606	2.3793	2.4682	2.0391	1.0246	0.912733	1.5432	2.295	4.0189	2.015	2.0613	3.1779	1.335	4.2205	4.1629	4.1629
0.7	0.8815	0.9109	3.7805	1.1865	0.6743	2.7543	3.1509	1.2958	1.0488	5.1135	0.7822	0.9728	0.6259	3.2061	1.3619	2.386	2.4671	2.0327	1.0263	0.91176	1.5508	2.2947	4.0168	2.0142	2.0651	3.1732	1.3382	4.2198	4.1857	4.1857
0.8	0.8841	0.9129	3.7802	1.1875	0.6764	2.7599	3.1927	1.2942	1.0486	5.1092	0.7825	0.9783	0.6276	3.1985	1.3654	2.3879	2.4679	2.0291	1.0286	0.90738	1.5499	2.2912	4.014	2.0127	2.0605	3.1706	1.3417	4.2202	4.2018	4.2018
0.9	0.8845	0.9145	3.7808	1.1872	0.68	2.7565	3.2325	1.2911	1.0503	5.1169	0.7822	0.9771	0.6313	3.1925	1.3682	2.3923	2.4653	2.0294	1.0308	0.909002	1.5523	2.2921	4.0133	2.0112	2.0575	3.1698	1.3463	4.2187	4.2113	4.2113
1	0.8834	0.916	3.7815	1.188	0.6777	2.7563	3.2724	1.2878	1.0509	5.1154	0.7827	0.9769	0.6324	3.1763	1.3718	2.3947	2.4655	2.0299	1.0314	0.90738	1.5552	2.2916	4.0102	2.0146	2.0674	3.1708	1.3517	4.2176	4.2157	4.2157
1.1	0.8823	0.9133	3.7853	1.189	0.6774	2.7625	3.3062	1.2876	1.0543	5.1088	0.784	0.9779	0.6344	3.1719	1.3707	2.3957	2.459	2.0244	1.0297	0.907056	1.5569	2.2912	4.0071	2.0189	2.0726	3.1753	1.3563	4.2121	4.215	4.215
1.2	0.8831	0.9147	3.7882	1.1905	0.6756	2.753	3.3383	1.2866	1.0549	5.1073	0.7848	0.9779	0.6376	3.181	1.3685	2.4034	2.4623	2.0202	1.0307	0.908354	1.5594	2.2912	4.0051	2.0189	2.0704	3.1849	1.3606	4.215	4.2128	4.2128
1.3	0.8811	0.9089	3.7924	1.1923	0.6748	2.7612	3.3629	1.2788	1.0563	5.1045	0.7848	0.9771	0.6337	3.193	1.3708	2.4049	2.4608	2.0219	1.0312	0.906245	1.5595	2.289	4.002	2.0185	2.0679	3.198	1.3655	4.2099	4.2062	4.2062
1.4	0.8851	0.9132	3.7995	1.1951	0.6733	2.7576	3.3892	1.2804	1.0526	5.0988	0.7848	0.9778	0.6342	3.1951	1.3699	2.4099	2.4604	2.0192	1.0318	0.909327	1.5576	2.2895	3.9968	2.0192	2.0687	3.2137	1.3684	4.2022	4.1945	4.1945
1.5	0.8827	0.9117	3.8114	1.1897	0.6731	2.7579	3.412	1.278	1.0529	5.0988	0.7833	0.9794	0.636	3.1985	1.3726	2.4047	2.4566	2.0189	1.0329	0.908029	1.5563	2.2917	3.993	2.0185	2.0704	3.232	1.3711	4.2066	4.1803	4.1803
1.6	0.8815	0.9131	3.8205	1.1912	0.6729	2.7688	3.4265	1.2792	1.0504	5.0917	0.7827	0.9764	0.6354	3.2166	1.3755	2.4159	2.458	2.0134	1.0313	0.908678	1.5559	2.2937	3.9937	2.0193	2.0739	3.2514	1.3729	4.2235	4.1661	4.1661
1.7	0.88	0.9118	3.8459	1.197	0.6746	2.773	3.4379	1.2768	1.0523	5.0837	0.7839	0.9805	0.6387	3.2211	1.3705	2.4198	2.4572	2.0124	1.032	0.908191	1.5561	2.296	3.9927	2.018	2.0769	3.2697	1.3739	4.2176	4.1481	4.1481
1.8	0.8792	0.9136	3.8551	1.2017	0.6728	2.7907	3.4542	1.2708	1.0519	5.0936	0.7809	0.9809	0.6362	3.2225	1.372	2.4147	2.456	2.009	1.0346	0.90738	1.559	2.2952	3.9961	2.0179	2.0775	3.2861	1.3741	4.2235	4.1305	4.1305
1.9	0.8771	0.9076	3.8683	1.1969	0.6739	2.7986	3.4648	1.2689	1.0489	5.1031	0.7818	0.9764	0.6396	3.2219	1.3716	2.4163	2.4545	2.0124	1.0363	0.90738	1.5558	2.2941	4.0009	2.0171	2.0762	3.3005	1.3742	4.2349	4.1112	4.1112
2	0.8782	0.9091	3.8908	1.1968	0.6746	2.8188	3.4735	1.269	1.0512	5.1021	0.7884	0.9762	0.6376	3.223	1.3714	2.414	2.4629	2.0197	1.0378	0.90738	1.5577	2.2937	4.0064	2.0168	2.0745	3.3114	1.3742	4.2394	4.0913	4.0913
2.1	0.8763	0.9113	3.9004	1.1981	0.6753	2.8356	3.4813	1.2668	1.0498	5.0927	0.7852	0.9773	0.6402	3.2312	1.3725	2.4225	2.47	2.0289	1.0401	0.909327	1.5595	2.2934	4.0123	2.0171	2.0704	3.3193	1.3731	4.2423	4.0722	4.0722
2.2	0.8779	0.9087	3.9221	1.1981	0.6734	2.8526	3.5025	1.2684	1.048	5.095	0.7844	0.9797	0.6393	3.2304	1.3745	2.4194	2.4849	2.04	1.0438	0.909813	1.56	2.2928	4.0189	2.0159	2.0652	3.324	1.3715	4.2512	4.054	4.054
2.3	0.8758	0.9076	3.9265	1.2013	0.6725	2.8795	3.497	1.2662	1.0512	5.104	0.7877	0.977	0.6426	3.2365	1.3701	2.4229	2.4955	2.0545	1.0483	0.91176	1.5659	2.2947	4.023	2.0166	2.0623	3.3262	1.3704	4.2557	4.038	4.038
2.4	0.8733	0.9079	3.9427	1.202	0.6731	2.8912	3.5192	1.2669	1.0502	5.0974	0.7854	0.9789	0.6416	3.2453	1.372	2.424	2.5115	2.0739	1.0497	0.914031	1.5716	2.2967	4.0261	2.0143	2.0596	3.3278	1.3698	4.2602	4.0265	4.0265
2.5	0.8764	0.9085	3.944	1.2017	0.6735	2.9114	3.5142	1.2651	1.0516	5.1083	0.7818	0.9816	0.643	3.2654	1.3759	2.4287	2.5276	2.0884	1.0566	0.91468	1.5753	2.2996	4.0293	2.0112	2.0575	3.3287	1.3678	4.2661	4.0144	4.0144
2.6	0.8758	0.9031	3.946	1.2037	0.6724	2.9239	3.5328	1.2666	1.0517	5.0979	0.786	0.9825	0.6451	3.2799	1.3798	2.4312	2.5449	2.1018	1.0604	0.917762	1.5784	2.3028	4.0317	2.0109	2.0525	3.3303	1.3645	4.2725	4.0037	4.0037
2.7	0.8778	0.9055	3.9481	1.2039	0.6723	2.9377	3.531	1.2721	1.0522	5.086	0.7856	0.9857	0.6447	3.2959	1.3798	2.4295	2.5625	2.1208	1.0608	0.917437	1.5835	2.3033	4.0338	2.0095	2.0486	3.3333	1.3615	4.2762	3.9958	3.9958
2.8	0.8772	0.9072	3.9457	1.2041	0.6723	2.956	3.5404	1.274	1.0524	5.079	0.7841	0.9823	0.6425	3.3065	1.3893	2.4287	2.5734	2.1337	1.0683	0.91841	1.5883	2.2996	4.0352	2.0082	2.0487	3.3355	1.3584	4.28	3.9886	3.9886
2.9	0.8798	0.9061	3.9494	1.2028	0.6713	2.9647	3.5354	1.2749	1.0519	5.063	0.7884	0.9815	0.6457	3.3182	1.3908	2.4334	2.5887	2.1452	1.0712	0.922466	1.5894	2.3029	4.0383	2.0061	2.0466	3.3372	1.3559	4.2901	3.9858	3.9858
3	0.8809	0.902	3.9481	1.2052	0.6729	2.9823	3.5398	1.2792	1.0538	5.0799	0.7853	0.9837	0.6477	3.324	1.391	2.4431	2.6012	2.1505	1.0744	0.923763	1.5923	2.3046	4.0425	2.0058	2.0425	3.3386	1.3531	4.2916	3.9841	3.9841
3.1	0.8801	0.903	3.9447	1.2067	0.673	2.9876	3.5434	1.2818	1.0489	5.0714	0.7838	0.9861	0.6461	3.3251	1.3967	2.4456	2.6079	2.1517	1.0716	0.924412	1.597	2.3024	4.0474	2.0054	2.0343	3.3391	1.3505	4.2965	3.9817	3.9817
3.2	0.8826	0.9006	3.9406	1.2091	0.6746	3.012	3.5458	1.2858	1.0502	5.0574	0.7791	0.9866	0.6462	3.3311	1.3971	2.4531	2.6108	2.1514	1.0761	0.927818	1.5972	2.3031	4.0526	2.0033	2.0288	3.3383	1.3476	4.3025	3.9834	3.9834
3.3	0.8826	0.9012	3.9369	1.2087	0.6742	3.0142	3.5541	1.2882	1.0534	5.062	0.7861	0.9862	0.6439	3.3276	1.3986	2.461	2.6108	2.158	1.0802	0.927656	1.5966	2.3064	4.0572	2.0033	2.0249	3.3347	1.3477	4.3033	3.9896	3.9896
3.4	0.8854	0.8981	3.939	1.2115	0.6767	3.0411	3.5514	1.2947	1.0515	5.0457	0.7849	0.9934	0.6457	3.3193	1.4016	2.4677	2.6118	2.1566	1.0779	0.931387	1.5996	2.312	4.0607	2.0008	2.0229	3.3314	1.3457	4.3101	4.0013	4.0013
3.5	0.883	0.8985	3.9248	1.2105	0.6743	3.0435	3.5639	1.2967	1.0529	5.0447	0.7855	0.9887	0.6493	3.3185	1.3984	2.4726	2.6089	2.1497	1.0767	0.932198	1.6008	2.3138	4.0628	2.0008	2.0202	3.33	1.3427	4.312	4.012	4.012
3.6	0.8824	0.897	3.9231	1.2085	0.6717	3.0669	3.5573	1.2999	1.0491	5.0433	0.7845	0.9864	0.6508	3.3049	1.4018	2.4734	2.6118	2.1473	1.0775	0.931062	1.6001	2.3164	4.0638	1.9985	2.0229	3.3284	1.3408	4.3173	4.0248	4.0248
3.7	0.883	0.8976	3.9131	1.21	0.6729	3.0699	3.5711	1.2982	1.0497	5.0429	0.786	0.9854	0.6499	3.3027	1.4023	2.4768	2.611	2.1387	1.0778	0.933982	1.5956	2.3249	4.0642	1.9977	2.0247	3.3278	1.3379	4.3188	4.0355	4.0355
3.8	0.8825	0.8978	3.9151	1.2152	0.6762	3.094	3.566	1.3006	1.0529	5.0354	0.7875	0.9853	0.6505	3.2994	1.4057	2.4841	2.6056	2.139	1.0769	0.938037	1.5945	2.3331	4.0635	1.9971	2.0355	3.3292	1.3352	4.3203	4.0446	4.0446
3.9	0.8863	0.8973	3.9037	1.2155	0.6746	3.0943	3.5755	1.3027	1.0527	5.0266	0.7865	0.9873	0.6544	3.2932	1.4032	2.4889	2.6014	2.1349	1.0762	0.934307	1.6	2.3453	4.0638	1.994	2.0478	3.3331	1.3327	4.3279	4.0512	4.0512
4	0.8842	0.8957	3.9041	1.2166	0.6729	3.1163	3.5696	1.3067	1.0541	5.0173	0.7843	0.9857	0.6526	3.2748	1.4029	2.4937	2.5962	2.1261	1.0759	0.933982	1.5963	2.36	4.0603	1.9937	2.0515	3.3383	1.3301	4.334	4.0547	4.0547
4.1	0.8832	0.8942	3.8908	1.2163	0.6749	3.126	3.5734	1.3087	1.0501	5.0182	0.7862	0.982	0.6541	3.2764	1.4002	2.4965	2.5916	2.1169	1.0737	0.933982	1.596	2.3776	4.0579	1.9924	2.0542	3.3449	1.3281	4.3352	4.0554	4.0554
4.2	0.8836	0.8957	3.8851	1.2176	0.6748	3.1242	3.5761	1.3139	1.0494	5.028	0.7843	0.9848	0.6532	3.2581	1.4048	2.4957	2.5872	2.1137	1.0725	0.936577	1.5902	2.4005	4.053	1.9913	2.0643	3.3496	1.3271	4.3375	4.0554	4.0554
4.3	0.8851	0.8955	3.8745	1.2194	0.6744	3.1499	3.5684	1.3208	1.0479	5.0085	0.7808	0.9795	0.6554	3.248	1.4054	2.4991	2.5839	2.104	1.0732	0.933496	1.5877	2.4178	4.0484	1.9897	2.074	3.3527	1.3271	4.3401	4.0565	4.0565
4.4	0.8823	0.8923	3.8722	1.2172	0.6736	3.1602	3.5731	1.3294	1.0496	5.0233	0.7851	0.9833	0.6538	3.2405	1.4044	2.5045	2.575	2.0946	1.0732	0.931387	1.5843	2.438	4.0446	1.9879	2.0782	3.3552	1.3258	4.3474	4.0624	4.0624
4.5	0.883	0.8937	3.8722	1.2223	0.6728	3.1548	3.5582	1.3373	1.0486	5.0247	0.7865	0.9805	0.6571	3.236	1.4044	2.5051	2.5728	2.0948	1.0732	0.93236	1.5894	2.4562	4.039	1.9876	2.0835	3.3552	1.3252	4.3482	4.0747	4.0747
4.6	0.8862	0.8919	3.8623	1.2203	0.673	3.1758	3.5651	1.3475	1.0481	5.027	0.7886	0.9808	0.6573	3.2323	1.4003	2.4997	2.5755	2.0872	1.0717	0.931387	1.5838	2.4718	4.0338	1.9857	2.0829	3.3521	1.3246	4.3524	4.0867	4.0867
4.7	0.8819	0.8884	3.8482	1.2197	0.6734	3.1956	3.5508	1.3578	1.0501	5.0275	0.7862	0.9752	0.6558	3.2227	1.4036	2.5007	2.5715	2.0797	1.0714	0.931062	1.5818	2.4825	4.0279	1.9854	2.082	3.3471	1.3238	4.3566	4.1016	4.1016
4.8	0.8845	0.892	3.8528	1.2214	0.673	3.2027	3.5505	1.3672	1.0497	5.0387	0.7865	0.9711	0.6572	3.2074	1.4011	2.5027	2.5701	2.0755	1.0685	0.932522	1.5801	2.4945	4.022	1.9844	2.0684	3.3419	1.3236	4.3574	4.1176	4.1176
4.9	0.8814	0.8899	3.8476	1.2246	0.6738	3.2035	3.5396	1.3753	1.05	5.0401	0.7878	0.9702	0.6601	3.2061	1.4012	2.5075	2.5705	2.0677	1.0694	0.929603	1.5788	2.5029	4.0165	1.9824	2.0473	3.3378	1.3242	4.36	4.1315	4.1315
5	0.8844	0.89	3.8368	1.2264	0.6728	3.2248	3.5357	1.3879	1.052	5.0345	0.7894	0.9652	0.6576	3.2019	1.3953	2.5087	2.5734	2.0661	1.0696	0.932036	1.5778	2.5077	4.0096	1.9827	2.044	3.338	1.3255	4.362	4.1455	4.1455
5.1	0.883	0.8896	3.8312	1.2274	0.6709	3.2522	3.5269	1.393	1.0541	5.0382	0.7918	0.9643	0.6589	3.1948	1.3973	2.5107	2.5781	2.0662	1.0691	0.930089	1.5762	2.5117	4.0051	1.9824	2.0445	3.3488	1.3273	4.362	4.1499	4.1499
5.2	0.8844	0.8909	3.8338	1.2267	0.6751	3.2509	3.5213	1.3987	1.0532	5.0429	0.7909	0.9619	0.6603	3.1909	1.3985	2.5131	2.5856	2.0629	1.0678	0.928143	1.5757	2.5167	3.9992	1.9806	2.0558	3.373	1.3289	4.3604	4.1499	4.1499
5.3	0.884	0.8864	3.8156	1.2273	0.674	3.2743	3.5142	1.4005	1.0548	5.0531	0.7897	0.9628	0.6618	3.1859	1.395	2.5139	2.5968	2.0631	1.0658	0.929603	1.5745	2.5165	3.9937	1.9803	2.0849	3.4095	1.3308	4.3608	4.1502	4.1502
5.4	0.8828	0.8886	3.8212	1.2243	0.6722	3.2878	3.5078	1.4033	1.0545	5.0527	0.7907	0.9613	0.662	3.1763	1.3934	2.5169	2.6141	2.0619	1.0686	0.928629	1.5724	2.5197	3.9896	1.972	2.0949	3.4533	1.3321	4.3639	4.1484	4.1484
5.5	0.8807	0.8888	3.8186	1.2271	0.6717	3.2888	3.499	1.4097	1.0537	5.0415	0.7906	0.9592	0.6641	3.1888	1.391	2.524	2.6322	2.0623	1.0669	0.926034	1.5728	2.5224	3.9848	1.9746	2.1044	3.499	1.3327	4.3654	4.1495	4.1495
5.6	0.8829	0.8859	3.8069	1.228	0.675	3.3147	3.4921	1.4101	1.0526	5.034	0.7892	0.9613	0.666	3.182	1.387	2.524	2.646	2.0628	1.0635	0.925061	1.5715	2.521	3.9811	1.9758	2.1162	3.5398	1.3332	4.3677	4.1535	4.1535
5.7	0.8847	0.8867	3.8101	1.2323	0.6751	3.3155	3.4833	1.4109	1.0514	5.0363	0.7919	0.959	0.6684	3.1867	1.3884	2.5252	2.6558	2.0565	1.0659	0.924574	1.569	2.5191	3.9773	1.9746	2.1187	3.574	1.3327	4.3704	4.1585	4.1585
5.8	0.8862	0.8865	3.8088	1.2281	0.6742	3.3364	3.4758	1.4072	1.051	5.0275	0.7927	0.9522	0.6664	3.1781	1.3885	2.5294	2.6684	2.0558	1.0623	0.928305	1.5686	2.5179	3.9742	1.973	2.112	3.6005	1.3321	4.3708	4.1629	4.1629
5.9	0.8854	0.8848	3.8092	1.2336	0.6745	3.3344	3.4663	1.4048	1.0519	5.0229	0.7882	0.952	0.6668	3.1779	1.3861	2.5327	2.68	2.0555	1.0635	0.926845	1.5715	2.5179	3.9681	1.9722	2.1039	3.6196	1.3308	4.3751	4.1723	4.1723
6	0.8851	0.8858	3.8021	1.2328	0.6717	3.3549	3.4559	1.3992	1.0512	5.0256	0.7905	0.9507	0.6677	3.1797	1.3856	2.5297	2.6928	2.0581	1.0583	0.924736	1.5694	2.5181	3.964	1.9723	2.0882	3.6278	1.3296	4.3747	4.1821	4.1821
6.1	0.8838	0.8843	3.7937	1.2314	0.671	3.3591	3.4456	1.3956	1.0513	5.0247	0.7902	0.9541	0.6693	3.1763	1.3892	2.5341	2.6982	2.0547	1.0581	0.925547	1.5667	2.5226	3.9606	1.9707	2.0772	3.6281	1.3285	4.3824	4.1941	4.1941
6.2	0.8844	0.8838	3.7953	1.2336	0.6718	3.3702	3.4353	1.3915	1.0527	5.0136	0.7888	0.9501	0.6705	3.1734	1.3884	2.5276	2.7021	2.052	1.0578	0.921817	1.5677	2.5218	3.9576	1.9695	2.0859	3.6229	1.3266	4.3832	4.208	4.208
6.3	0.8844	0.8814	3.7924	1.2353	0.6722	3.3872	3.4251	1.3885	1.0505	5.0122	0.7945	0.9536	0.6704	3.1794	1.386	2.5305	2.7045	2.0534	1.0574	0.922952	1.5681	2.5224	3.9545	1.9676	2.0834	3.6132	1.3249	4.3863	4.2283	4.2283
6.4	0.8846	0.8799	3.7882	1.2404	0.6729	3.3836	3.4143	1.3805	1.0509	5.0136	0.7964	0.9531	0.6709	3.1838	1.388	2.5282	2.7047	2.0484	1.0568	0.922141	1.5678	2.525	3.9521	1.9658	2.0672	3.6002	1.3241	4.389	4.2549	4.2549
6.5	0.885	0.88	3.7918	1.2419	0.6712	3.4047	3.4041	1.3754	1.0512	5.0071	0.7951	0.9532	0.6687	3.1721	1.3902	2.5307	2.7058	2.0486	1.0539	0.923601	1.5657	2.5254	3.9501	1.9649	2.0562	3.5821	1.3235	4.3932	4.2879	4.2879
6.6	0.8824	0.8808	3.7979	1.2439	0.6723	3.4021	3.3951	1.3735	1.0501	5.0016	0.7955	0.9515	0.6732	3.1714	1.3908	2.5288	2.7029	2.0427	1.055	0.919221	1.5654	2.5288	3.9471	1.9627	2.0428	3.5567	1.3241	4.3995	4.3314	4.3314
6.7	0.8864	0.88	3.8053	1.2431	0.6711	3.4143	3.3878	1.3679	1.0522	4.9919	0.7963	0.954	0.6742	3.1727	1.3929	2.5242	2.7012	2.043	1.0503	0.922141	1.5691	2.5313	3.945	1.9601	2.0381	3.5301	1.3258	4.408	4.3743	4.3743
6.8	0.887	0.8791	3.804	1.2434	0.672	3.4214	3.376	1.3654	1.0486	5.0002	0.7946	0.9536	0.6747	3.1714	1.3924	2.5274	2.6984	2.0407	1.0509	0.921006	1.568	2.528	3.942	1.9614	2.0343	3.5037	1.3294	4.4088	4.4154	4.4154
6.9	0.8873	0.8778	3.8063	1.2433	0.6724	3.4211	3.3702	1.3626	1.0505	4.9859	0.7914	0.9574	0.6749	3.181	1.3865	2.5258	2.6954	2.0386	1.0493	0.918248	1.569	2.5242	3.939	1.9594	2.0348	3.4778	1.3362	4.403	4.4519	4.4519
7	0.883	0.8803	3.8118	1.2422	0.675	3.4271	3.3599	1.3552	1.0494	4.9676	0.7915	0.9594	0.6754	3.1753	1.391	2.5252	2.6897	2.0317	1.0488	0.92133	1.5698	2.5203	3.9369	1.9589	2.0376	3.4539	1.3455	4.3995	4.4801	4.4801
7.1	0.8823	0.8806	3.8254	1.2423	0.6714	3.4262	3.3524	1.3498	1.0491	4.9859	0.7894	0.959	0.6753	3.1779	1.3872	2.526	2.6843	2.0315	1.048	0.920032	1.5721	2.5187	3.9346	1.957	2.0387	3.4322	1.3581	4.4037	4.5	4.5
7.2	0.8808	0.8815	3.8231	1.2424	0.6718	3.4236	3.3543	1.3457	1.0476	4.9887	0.7878	0.9599	0.6758	3.1714	1.3879	2.5212	2.6822	2.0252	1.0486	0.919059	1.573	2.5155	3.9322	1.9581	2.0396	3.4132	1.3725	4.3979	4.5141	4.5141
7.3	0.8817	0.8781	3.827	1.2421	0.6709	3.4262	3.3491	1.3429	1.05	5.0007	0.7851	0.9591	0.677	3.176	1.3901	2.5214	2.6744	2.0286	1.0473	0.918086	1.5729	2.5131	3.9312	1.9551	2.0509	3.3959	1.3889	4.3979	4.5189	4.5189
7.4	0.8823	0.8761	3.841	1.248	0.6715	3.4231	3.3505	1.3385	1.0494	4.9914	0.7857	0.9625	0.6749	3.1784	1.3897	2.5218	2.6635	2.0257	1.0465	0.917762	1.5749	2.5073	3.9278	1.9548	2.0583	3.3788	1.4088	4.3956	4.5233	4.5233
7.5	0.8796	0.8737	3.8574	1.247	0.6712	3.4185	3.3566	1.3371	1.0469	5.0113	0.7828	0.9599	0.676	3.1784	1.3867	2.5169	2.6637	2.0245	1.0488	0.918086	1.5795	2.5003	3.9252	1.9532	2.0585	3.3643	1.4289	4.396	4.5229	4.5229
7.6	0.8807	0.8748	3.8538	1.2455	0.67	3.4168	3.3638	1.3349	1.0472	5.0159	0.7791	0.9644	0.6733	3.1792	1.3898	2.5123	2.6535	2.0242	1.0499	0.916139	1.5806	2.4953	3.9245	1.9526	2.0567	3.3518	1.4467	4.3936	4.5197	4.5197
7.7	0.8818	0.8716	3.8561	1.2462	0.6696	3.41	3.3724	1.3316	1.0458	5.0256	0.7822	0.9621	0.6752	3.1742	1.3946	2.5103	2.6475	2.0192	1.0525	0.914842	1.5805	2.4903	3.9231	1.9505	2.0638	3.3411	1.465	4.3909	4.5169	4.5169
7.8	0.8798	0.8725	3.8623	1.2478	0.6709	3.4021	3.3844	1.3277	1.0496	5.0326	0.7826	0.9682	0.6777	3.174	1.396	2.5109	2.6471	2.0239	1.0567	0.918735	1.5796	2.4849	3.9201	1.9505	2.0651	3.3328	1.4862	4.3859	4.5189	4.5189
7.9	0.8777	0.8722	3.862	1.2479	0.6736	3.3937	3.394	1.3256	1.0474	5.0517	0.7845	0.9656	0.6808	3.1831	1.3939	2.5065	2.6401	2.0189	1.0612	0.917762	1.5812	2.4793	3.9178	1.9493	2.0692	3.3281	1.5108	4.3863	4.5371	4.5371
8	0.8813	0.8716	3.8686	1.2495	0.6705	3.383	3.4083	1.3191	1.0477	5.0649	0.7831	0.963	0.6785	3.2001	1.3967	2.5109	2.6377	2.0158	1.0622	0.917275	1.586	2.4746	3.9148	1.949	2.0802	3.3273	1.5339	4.382	4.5757	4.5757
8.1	0.8819	0.8714	3.8627	1.2528	0.6702	3.373	3.4174	1.3159	1.0448	5.0663	0.7819	0.9629	0.6798	3.2111	1.3981	2.5093	2.631	2.0119	1.0643	0.915328	1.5921	2.474	3.9131	1.9476	2.0941	3.3213	1.5572	4.3801	4.6256	4.6256
8.2	0.8813	0.871	3.8656	1.2507	0.6719	3.3674	3.4191	1.3158	1.0445	5.0635	0.7823	0.9677	0.6819	3.2301	1.4015	2.5091	2.624	2.0121	1.0644	0.917113	1.5927	2.4681	3.9104	1.9471	2.1042	3.315	1.5757	4.3739	4.6771	4.6771
8.3	0.8778	0.8705	3.8709	1.255	0.6743	3.3591	3.4217	1.3114	1.0465	5.0728	0.7839	0.9655	0.6804	3.2509	1.4069	2.5103	2.6188	2.0134	1.0668	0.915491	1.5951	2.4625	3.9091	1.9458	2.1147	3.307	1.5913	4.3716	4.7254	4.7254
8.4	0.8791	0.8686	3.8732	1.2528	0.6723	3.3549	3.4313	1.3119	1.0472	5.0827	0.7848	0.964	0.6808	3.263	1.4103	2.5117	2.619	2.0111	1.07	0.913544	1.5983	2.46	3.9067	1.9465	2.1252	3.3002	1.605	4.3674	4.7697	4.7697
8.5	0.8785	0.8687	3.8676	1.2528	0.6721	3.3552	3.433	1.3118	1.047	5.07	0.7867	0.9664	0.6827	3.2815	1.4142	2.5173	2.6162	2.01	1.0681	0.914355	1.5971	2.4558	3.9061	1.9454	2.1358	3.2945	1.6172	4.3639	4.8058	4.8058
8.6	0.8798	0.8689	3.8732	1.2533	0.672	3.3532	3.4285	1.3071	1.0431	5.0733	0.7878	0.9689	0.6815	3.2815	1.4125	2.5238	2.6125	2.0082	1.0665	0.91468	1.605	2.4531	3.9044	1.9444	2.1394	3.2894	1.6298	4.3608	4.8295	4.8295
8.7	0.8789	0.8653	3.8851	1.2554	0.669	3.3585	3.4313	1.3113	1.0473	5.0733	0.7881	0.9728	0.6798	3.2932	1.4137	2.5359	2.6087	2.0056	1.0688	0.914355	1.6048	2.4496	3.9031	1.9439	2.1425	3.2848	1.6411	4.3585	4.8427	4.8427
8.8	0.8782	0.8684	3.8888	1.2557	0.6736	3.3607	3.4288	1.3086	1.0482	5.0757	0.7863	0.9671	0.6833	3.2951	1.4172	2.5431	2.6056	2.0037	1.07	0.913544	1.608	2.4466	3.9007	1.9421	2.1426	3.2818	1.6507	4.357	4.8462	4.8462
8.9	0.8789	0.8661	3.8831	1.2591	0.6733	3.3682	3.4313	1.3062	1.0453	5.0649	0.7853	0.968	0.6858	3.2981	1.4165	2.5502	2.6047	2.0035	1.0693	0.912084	1.6089	2.4458	3.8997	1.9405	2.1414	3.2791	1.6582	4.3528	4.8418	4.8418
9	0.8784	0.865	3.8812	1.2571	0.6739	3.3746	3.4251	1.3088	1.0464	5.0616	0.7823	0.9676	0.6888	3.2992	1.4186	2.558	2.5983	2.0014	1.0682	0.914031	1.6086	2.4437	3.8978	1.941	2.139	3.2767	1.6602	4.3505	4.8317	4.8317
9.1	0.8782	0.8625	3.8951	1.2575	0.6731	3.3839	3.4245	1.3092	1.0471	5.0705	0.783	0.9662	0.6879	3.2962	1.4165	2.5658	2.5951	1.9996	1.0668	0.91468	1.608	2.4376	3.8948	1.941	2.1366	3.2743	1.6617	4.3505	4.8194	4.8194
9.2	0.8772	0.863	3.8931	1.2599	0.6732	3.3886	3.4251	1.3055	1.0453	5.0569	0.7862	0.9667	0.6893	3.2967	1.4154	2.5715	2.5958	2.0009	1.0625	0.913058	1.6073	2.4334	3.8934	1.94	2.1354	3.2713	1.6626	4.3485	4.8041	4.8041
9.3	0.8768	0.8629	3.8888	1.2608	0.6745	3.3968	3.4231	1.3077	1.0456	5.0475	0.7872	0.9705	0.6876	3.2954	1.4188	2.5792	2.5949	2.0009	1.0629	0.911436	1.6065	2.4299	3.8928	1.9374	2.1368	3.2697	1.663	4.3528	4.7853	4.7853
9.4	0.8783	0.8622	3.8818	1.2614	0.671	3.3982	3.4288	1.3085	1.0472	5.041	0.7809	0.9699	0.6915	3.2913	1.4188	2.5821	2.5926	1.9984	1.0562	0.911922	1.6058	2.4277	3.8898	1.9377	2.1365	3.2699	1.6674	4.3447	4.7602	4.7602
9.5	0.8776	0.8638	3.8845	1.261	0.6734	3.4002	3.4362	1.3084	1.046	5.0401	0.7852	0.9706	0.6912	3.291	1.4179	2.5839	2.5908	1.9966	1.059	0.911598	1.6082	2.4238	3.8891	1.9377	2.1377	3.271	1.6716	4.3417	4.7306	4.7306
9.6	0.8775	0.8639	3.8921	1.2613	0.6753	3.4024	3.447	1.3078	1.0473	5.0396	0.7845	0.9739	0.6894	3.2783	1.4189	2.5868	2.586	1.995	1.0583	0.911922	1.6068	2.4225	3.8878	1.9371	2.1377	3.2716	1.6733	4.3405	4.6978	4.6978
9.7	0.8769	0.8639	3.8752	1.2638	0.6742	3.4033	3.4631	1.304	1.0452	5.0373	0.7841	0.9701	0.6943	3.2756	1.4166	2.5904	2.5821	1.9963	1.0562	0.913544	1.6076	2.4223	3.8851	1.936	2.1368	3.2729	1.6774	4.3394	4.6632	4.6632
9.8	0.8777	0.8605	3.8861	1.2629	0.6734	3.4024	3.483	1.3045	1.0454	5.0331	0.7863	0.9683	0.6916	3.2648	1.4112	2.5912	2.5806	1.9959	1.0481	0.914031	1.609	2.4225	3.8828	1.9339	2.1358	3.2732	1.6844	4.3378	4.626	4.626
9.9	0.877	0.8625	3.8749	1.2683	0.6731	3.4013	3.5058	1.3037	1.0456	5.0335	0.7862	0.9694	0.6904	3.2611	1.4093	2.5906	2.5806	1.9942	1.0496	0.912733	1.6118	2.4221	3.8805	1.9302	2.1327	3.2726	1.6948	4.3405	4.5889	4.5889
10	0.8756	0.8622	3.8745	1.2668	0.674	3.399	3.5248	1.3033	1.044	5.0247	0.7847	0.9708	0.691	3.2538	1.409	2.5941	2.5808	1.9932	1.0511	0.913382	1.6149	2.4219	3.8772	1.9299	2.1322	3.2708	1.7108	4.3314	4.5553	4.5553
10.1	0.8764	0.8621	3.8745	1.264	0.6729	3.3959	3.5419	1.3023	1.047	5.0127	0.7826	0.9705	0.6897	3.2466	1.4083	2.591	2.5835	1.9923	1.0523	0.912571	1.6136	2.4219	3.8745	1.9322	2.1341	3.2689	1.7228	4.3302	4.5201	4.5201
10.2	0.8748	0.8612	3.8686	1.2661	0.6755	3.3943	3.56	1.302	1.0475	5.0007	0.7857	0.9721	0.6926	3.2568	1.4055	2.5895	2.5819	1.9926	1.0491	0.911922	1.6177	2.4225	3.8735	1.9308	2.1329	3.2675	1.7325	4.3298	4.4876	4.4876
10.3	0.8738	0.8626	3.8653	1.269	0.6731	3.3872	3.5749	1.3021	1.0467	5.0043	0.7886	0.972	0.6952	3.2592	1.4059	2.5875	2.586	1.9929	1.0482	0.912733	1.6172	2.4273	3.8719	1.9293	2.1317	3.2667	1.7375	4.3279	4.4567	4.4567
10.4	0.8767	0.8646	3.8633	1.2692	0.6707	3.3819	3.5836	1.3006	1.0441	5.0011	0.7864	0.9759	0.6956	3.2546	1.4036	2.5858	2.585	1.9852	1.0487	0.91468	1.6204	2.431	3.8689	1.9299	2.1322	3.2675	1.7405	4.3268	4.4291	4.4291
10.5	0.8744	0.8624	3.8643	1.2732	0.6695	3.3777	3.5963	1.2988	1.0467	4.9919	0.7824	0.9758	0.6954	3.2597	1.3971	2.5827	2.5846	1.9855	1.0458	0.911111	1.6252	2.4374	3.8676	1.9235	2.1339	3.2718	1.7446	4.3317	4.4041	4.4041
10.6	0.8775	0.862	3.8653	1.2738	0.6727	3.3677	3.602	1.2982	1.0454	4.997	0.7853	0.9775	0.6929	3.2732	1.4027	2.5812	2.5858	1.9875	1.0445	0.912409	1.6247	2.4376	3.8653	1.9209	2.1329	3.284	1.749	4.3245	4.3812	4.3812
10.7	0.8791	0.8651	3.864	1.2734	0.6724	3.3591	3.6102	1.3004	1.0445	4.9905	0.7847	0.9799	0.6938	3.2967	1.4016	2.5786	2.5841	1.9867	1.0454	0.911111	1.6214	2.4456	3.864	1.9251	2.1327	3.307	1.753	4.3203	4.3612	4.3612
10.8	0.8817	0.8633	3.8528	1.2754	0.6713	3.3507	3.6114	1.2964	1.0451	4.9924	0.7817	0.9787	0.6904	3.3024	1.3968	2.5775	2.5843	1.9873	1.0445	0.913706	1.6236	2.4494	3.862	1.9241	2.1329	3.343	1.756	4.3207	4.3417	4.3417
10.9	0.8829	0.8652	3.8505	1.2755	0.6726	3.3422	3.6095	1.2964	1.046	4.9763	0.7802	0.9795	0.6914	3.2956	1.3924	2.5709	2.5771	1.9916	1.044	0.912084	1.6235	2.4562	3.8617	1.9234	2.133	3.3923	1.7603	4.3219	4.3234	4.3234
11	0.8837	0.8668	3.8417	1.2745	0.6726	3.332	3.6129	1.2972	1.0447	4.9763	0.7814	0.9829	0.6907	3.3092	1.3903	2.5697	2.5769	1.9945	1.0443	0.914193	1.6259	2.4586	3.8591	1.9232	2.1295	3.4519	1.7701	4.3203	4.3082	4.3082
11.1	0.8845	0.864	3.8479	1.2745	0.6742	3.3207	3.6129	1.2967	1.0442	4.9818	0.7797	0.9841	0.6907	3.3276	1.3901	2.5713	2.5771	2.0045	1.0429	0.916464	1.6287	2.4641	3.8594	1.9238	2.1261	3.5151	1.7775	4.3219	4.2939	4.2939
11.2	0.8862	0.8661	3.8495	1.2789	0.673	3.3073	3.6062	1.2968	1.0432	4.9947	0.7825	0.9811	0.6927	3.312	1.3898	2.5654	2.5765	2.0095	1.0409	0.91468	1.6299	2.4649	3.861	1.9227	2.121	3.5752	1.7837	4.3184	4.2826	4.2826
11.3	0.8882	0.8656	3.8371	1.2801	0.6742	3.2973	3.6062	1.2967	1.0442	4.9933	0.782	0.9843	0.6927	3.3035	1.3911	2.5647	2.5724	2.0187	1.0405	0.914355	1.6271	2.4679	3.8646	1.921	2.1293	3.6296	1.7917	4.3226	4.2744	4.2744
11.4	0.8893	0.8691	3.8394	1.2785	0.6741	3.2869	3.6011	1.2976	1.0436	5.0002	0.7816	0.9843	0.6957	3.3076	1.393	2.5604	2.5726	2.0237	1.0401	0.917437	1.6284	2.4688	3.8683	1.9189	2.1341	3.6791	1.7974	4.3169	4.2717	4.2717
11.5	0.8932	0.87	3.8335	1.279	0.6717	3.2751	3.5954	1.2993	1.043	5.0094	0.7822	0.9839	0.6945	3.3051	1.3922	2.559	2.5736	2.0317	1.0399	0.915491	1.6294	2.4692	3.8699	1.9178	2.1356	3.7297	1.801	4.315	4.2702	4.2702
11.6	0.8906	0.87	3.8273	1.2796	0.673	3.2619	3.5893	1.301	1.0433	5.0201	0.7848	0.9811	0.6957	3.2975	1.3946	2.5539	2.5715	2.0461	1.0433	0.916302	1.6267	2.4671	3.8722	1.9144	2.1319	3.7776	1.8025	4.315	4.2699	4.2699
11.7	0.8929	0.8703	3.8264	1.2789	0.6703	3.2498	3.5939	1.2946	1.0435	5.0354	0.7838	0.9813	0.694	3.3054	1.3966	2.5545	2.567	2.0486	1.0394	0.915977	1.6245	2.4631	3.8752	1.9067	2.1211	3.8212	1.8028	4.3131	4.268	4.268
11.8	0.8925	0.8698	3.8192	1.2813	0.6734	3.2362	3.5893	1.2962	1.0426	5.0545	0.7853	0.9835	0.6944	3.2989	1.3991	2.5508	2.5645	2.0509	1.0379	0.915491	1.6213	2.4598	3.8742	1.9142	2.1313	3.8581	1.8054	4.3139	4.2672	4.2672
11.9	0.8949	0.8677	3.8267	1.2804	0.6722	3.227	3.5923	1.3018	1.0452	5.0606	0.7852	0.9794	0.6946	3.3	1.3983	2.5563	2.5654	2.0583	1.0368	0.914517	1.6225	2.4519	3.8742	1.9139	2.1324	3.8874	1.8081	4.3295	4.2643	4.2643
12	0.8938	0.867	3.8296	1.2825	0.6712	3.2161	3.6117	1.3024	1.0435	5.0696	0.7875	0.981	0.6963	3.2943	1.404	2.5565	2.5732	2.0616	1.0378	0.916302	1.6168	2.4511	3.8732	1.913	2.1342	3.9057	1.8097	4.3352	4.2639	4.2639
12.1	0.8954	0.868	3.8208	1.2835	0.6728	3.2085	3.6272	1.2976	1.0428	5.0856	0.7841	0.9794	0.6933	3.2926	1.4076	2.5526	2.5765	2.0643	1.0395	0.915166	1.6197	2.449	3.8726	1.9132	2.1312	3.9144	1.8139	4.3181	4.262	4.262
12.2	0.8956	0.8682	3.8218	1.2836	0.6723	3.1969	3.6532	1.2972	1.0418	5.1021	0.7882	0.9804	0.6983	3.2786	1.4142	2.5524	2.5854	2.0634	1.0382	0.916626	1.6212	2.4476	3.8719	1.9111	2.1341	3.9181	1.8135	4.3112	4.2609	4.2609
12.3	0.8933	0.8694	3.8244	1.2862	0.6722	3.1854	3.6738	1.3006	1.0445	5.1111	0.7841	0.9787	0.7022	3.288	1.4183	2.5484	2.5947	2.0634	1.0382	0.913869	1.6197	2.4464	3.8706	1.9098	2.1339	3.9138	1.8139	4.3071	4.259	4.259
12.4	0.8923	0.8685	3.8309	1.2873	0.6726	3.1852	3.6983	1.3019	1.0454	5.1197	0.7849	0.9755	0.7018	3.2897	1.4231	2.5484	2.6047	2.0629	1.0375	0.91468	1.6194	2.441	3.8689	1.9096	2.1334	3.8991	1.8138	4.3075	4.2568	4.2568
12.5	0.893	0.8667	3.8286	1.2882	0.672	3.1641	3.7294	1.2989	1.0422	5.1316	0.7872	0.9747	0.7004	3.294	1.4249	2.5482	2.6177	2.0628	1.0403	0.916626	1.6198	2.4351	3.8676	1.9088	2.1327	3.8798	1.8125	4.3018	4.2542	4.2542
12.6	0.8895	0.8674	3.8306	1.2884	0.6714	3.1638	3.7566	1.2984	1.045	5.1355	0.7856	0.9718	0.7013	3.312	1.43	2.5437	2.6322	2.059	1.0416	0.915977	1.6235	2.4297	3.8653	1.9076	2.1341	3.8577	1.81	4.3025	4.252	4.252
12.7	0.8893	0.8658	3.829	1.2882	0.6697	3.155	3.7751	1.2984	1.0447	5.1402	0.7862	0.9732	0.7035	3.3215	1.4346	2.5426	2.6422	2.0586	1.0436	0.920519	1.6243	2.4262	3.862	1.9068	2.1296	3.8322	1.8054	4.2988	4.2483	4.2483
12.8	0.8898	0.864	3.8361	1.2866	0.672	3.1489	3.7947	1.3011	1.0449	5.1436	0.7887	0.9692	0.6998	3.33	1.4391	2.5424	2.6458	2.055	1.0437	0.915166	1.6248	2.4248	3.8591	1.9047	2.1303	3.8082	1.8	4.3007	4.2445	4.2445
12.9	0.8901	0.8622	3.8446	1.2882	0.6713	3.1424	3.8079	1.3025	1.0445	5.1489	0.787	0.9666	0.7009	3.3502	1.4448	2.5363	2.6554	2.0512	1.0466	0.913544	1.6233	2.4225	3.8548	1.9048	2.1261	3.7901	1.7936	4.2973	4.2408	4.2408
13	0.8945	0.8635	3.8587	1.291	0.6734	3.1337	3.8153	1.3051	1.0461	5.1398	0.7887	0.9667	0.7001	3.3563	1.4495	2.5325	2.6586	2.0543	1.0505	0.914355	1.628	2.4202	3.8522	1.9018	2.1257	3.777	1.787	4.3014	4.2371	4.2371
13.1	0.8958	0.8619	3.865	1.2884	0.6699	3.1248	3.8195	1.3079	1.0461	5.1474	0.7895	0.9637	0.6971	3.3699	1.4519	2.5359	2.6665	2.0535	1.0531	0.912409	1.6267	2.419	3.8479	1.9008	2.1245	3.7681	1.7806	4.2976	4.2338	4.2338
13.2	0.8957	0.8618	3.8841	1.2893	0.6716	3.1235	3.8257	1.3126	1.0481	5.147	0.7864	0.9604	0.6983	3.3791	1.4552	2.5349	2.6663	2.0573	1.0562	0.911273	1.6259	2.4227	3.844	1.8985	2.1266	3.761	1.7753	4.2958	4.2297	4.2297
13.3	0.8956	0.8632	3.8948	1.2911	0.6728	3.1092	3.8332	1.3096	1.0495	5.1417	0.7879	0.9609	0.6976	3.373	1.4552	2.5337	2.6695	2.0578	1.0557	0.909327	1.6283	2.4219	3.8417	1.8985	2.1242	3.7515	1.7779	4.2912	4.2264	4.2264
13.4	0.8976	0.8614	3.9081	1.2902	0.6751	3.1128	3.8387	1.3085	1.0479	5.1374	0.7849	0.9598	0.6984	3.371	1.4604	2.5305	2.6656	2.0636	1.0591	0.912571	1.6268	2.4225	3.8384	1.8975	2.1232	3.7433	1.7757	4.2946	4.2231	4.2231
13.5	0.8992	0.8604	3.9238	1.2913	0.6734	3.1052	3.8391	1.3077	1.0498	5.1345	0.7848	0.9555	0.6999	3.3671	1.4596	2.5274	2.6626	2.0662	1.0638	0.911922	1.6284	2.4267	3.8345	1.8968	2.1232	3.7373	1.7731	4.2879	4.2194	4.2194
13.6	0.899	0.8593	3.9359	1.2933	0.673	3.0986	3.8368	1.3085	1.0466	5.1273	0.7845	0.9538	0.6991	3.3671	1.4625	2.5286	2.6592	2.0697	1.0633	0.915328	1.6307	2.4269	3.8309	1.8935	2.1233	3.7268	1.771	4.2886	4.2168	4.2168
13.7	0.8998	0.8582	3.9417	1.2971	0.6727	3.1034	3.8352	1.3023	1.0492	5.1188	0.786	0.9507	0.7012	3.3671	1.4645	2.5262	2.6567	2.0727	1.0652	0.913544	1.6308	2.4248	3.8303	1.893	2.1228	3.7149	1.7684	4.2852	4.2143	4.2143
13.8	0.8991	0.8567	3.943	1.2972	0.6706	3.0983	3.8342	1.3034	1.0472	5.1145	0.7855	0.9546	0.6975	3.3719	1.4662	2.5228	2.6552	2.0722	1.0653	0.911436	1.6283	2.4271	3.8306	1.8944	2.1203	3.7018	1.7643	4.2833	4.2128	4.2128
13.9	0.8978	0.8582	3.9471	1.2985	0.6702	3.1021	3.8358	1.2979	1.0509	5.104	0.7856	0.9541	0.6977	3.3741	1.4671	2.5185	2.6496	2.0752	1.0656	0.913544	1.6306	2.4304	3.8277	1.8953	2.124	3.6884	1.7609	4.2796	4.211	4.211
14	0.8998	0.8587	3.9569	1.2986	0.6705	3.1118	3.8365	1.3034	1.0491	5.114	0.7884	0.9488	0.7006	3.3688	1.4684	2.5141	2.645	2.081	1.0638	0.912409	1.6288	2.4304	3.8251	1.8933	2.1264	3.6754	1.7607	4.2788	4.2102	4.2102
14.1	0.8981	0.8591	3.9582	1.2991	0.6732	3.112	3.8397	1.303	1.0488	5.1273	0.7925	0.9494	0.7024	3.3693	1.471	2.5159	2.6382	2.0834	1.0655	0.912084	1.6264	2.4302	3.8221	1.8916	2.1255	3.6633	1.7582	4.277	4.2095	4.2095
14.2	0.8979	0.8606	3.9593	1.3021	0.6718	3.1151	3.8443	1.3023	1.0494	5.1202	0.7921	0.945	0.7033	3.3638	1.4714	2.5123	2.6375	2.0852	1.0638	0.914193	1.6276	2.4234	3.8186	1.8822	2.1223	3.6522	1.7562	4.2762	4.2088	4.2088
14.3	0.8984	0.8572	3.9579	1.3006	0.671	3.1225	3.8479	1.2985	1.048	5.1326	0.7923	0.9461	0.7072	3.3657	1.4729	2.5081	2.6297	2.0882	1.0588	0.91322	1.6272	2.4229	3.8189	1.8886	2.1193	3.6446	1.7543	4.2729	4.208	4.208
14.4	0.8962	0.8566	3.9548	1.3043	0.6719	3.1209	3.8505	1.2966	1.0484	5.1321	0.7959	0.9422	0.7071	3.3599	1.477	2.5091	2.6236	2.0949	1.0642	0.917275	1.6248	2.4219	3.8286	1.8883	2.1208	3.6384	1.7523	4.2785	4.2069	4.2069
14.5	0.8982	0.8581	3.9569	1.3061	0.669	3.1255	3.8499	1.2993	1.0484	5.1484	0.7967	0.9427	0.7088	3.3646	1.4748	2.5055	2.6192	2.1005	1.0671	0.918897	1.6259	2.4178	3.8499	1.8866	2.117	3.6311	1.7497	4.2845	4.2058	4.2058
14.6	0.8976	0.8592	3.9572	1.3079	0.6714	3.1281	3.8472	1.3026	1.0487	5.1667	0.7908	0.9453	0.7092	3.3488	1.481	2.5047	2.6192	2.1103	1.0613	0.919221	1.6233	2.4174	3.8884	1.8855	2.1211	3.6238	1.7462	4.2815	4.2044	4.2044
14.7	0.8956	0.858	3.9589	1.3057	0.6693	3.1273	3.8443	1.3029	1.0481	5.1865	0.7933	0.9431	0.7084	3.3455	1.482	2.5003	2.6171	2.1133	1.0633	0.922628	1.6205	2.4207	3.9467	1.8854	2.1194	3.6165	1.7425	4.2781	4.2055	4.2055
14.8	0.8954	0.8598	3.9518	1.31	0.6706	3.1288	3.84	1.3066	1.0473	5.1948	0.7938	0.9431	0.7099	3.3513	1.4792	2.5001	2.6175	2.1172	1.0631	0.924088	1.6204	2.4169	4.0251	1.8857	2.1204	3.6071	1.739	4.277	4.2102	4.2102
14.9	0.897	0.8585	3.945	1.3143	0.6679	3.1324	3.8325	1.3108	1.0489	5.2074	0.798	0.9372	0.7123	3.3491	1.481	2.5019	2.6194	2.1262	1.0618	0.920195	1.6197	2.4169	4.1169	1.8839	2.1155	3.5963	1.7362	4.2762	4.2198	4.2198
15	0.9005	0.8581	3.9467	1.3106	0.6697	3.1319	3.8251	1.311	1.0476	5.2172	0.7953	0.9378	0.7118	3.3549	1.4807	2.5027	2.6228	2.1301	1.0644	0.921817	1.619	2.4157	4.2121	1.8831	2.1082	3.5872	1.7351	4.2758	4.2305	4.2305
15.1	0.8978	0.856	3.9369	1.3143	0.6736	3.1342	3.8189	1.3118	1.047	5.2299	0.7988	0.9398	0.7086	3.3538	1.4831	2.4979	2.6251	2.1344	1.0621	0.923439	1.6173	2.4157	4.3071	1.8814	2.1091	3.5758	1.7361	4.2773	4.2431	4.2431
15.2	0.8966	0.8542	3.9346	1.3188	0.6726	3.1404	3.8095	1.3079	1.0461	5.2422	0.7974	0.9397	0.7128	3.3591	1.4857	2.4975	2.6272	2.1363	1.0645	0.924736	1.6205	2.4124	4.3995	1.8808	2.1118	3.5657	1.7366	4.2864	4.2557	4.2557
15.3	0.8991	0.8576	3.9238	1.3133	0.6734	3.1519	3.7992	1.3138	1.0464	5.2516	0.8008	0.9425	0.7115	3.3624	1.487	2.4937	2.6295	2.1358	1.0613	0.926034	1.6169	2.409	4.4892	1.8798	2.1098	3.5556	1.7362	4.2864	4.2672	4.2672
15.4	0.8973	0.8555	3.9292	1.3133	0.6746	3.1605	3.7911	1.3098	1.0469	5.2506	0.7992	0.9423	0.7148	3.3624	1.4837	2.4955	2.6337	2.1392	1.0581	0.925547	1.6165	2.4074	4.5811	1.8775	2.1111	3.5458	1.7378	4.2766	4.2777	4.2777
15.5	0.8979	0.8538	3.9225	1.3116	0.6745	3.1711	3.778	1.3134	1.0466	5.2481	0.8009	0.9399	0.7206	3.3727	1.4851	2.4947	2.6392	2.1454	1.0567	0.927818	1.6158	2.4057	4.6678	1.8778	2.1118	3.5363	1.7375	4.28	4.2871	4.2871
15.6	0.9006	0.8527	3.9228	1.3106	0.6767	3.1912	3.7687	1.3153	1.0481	5.2624	0.8008	0.9378	0.7208	3.3716	1.486	2.4989	2.6413	2.1499	1.0543	0.931387	1.6156	2.4041	4.7606	1.8746	2.1131	3.5257	1.7378	4.2762	4.2939	4.2939
15.7	0.899	0.8561	3.9191	1.3088	0.6767	3.1998	3.7575	1.3126	1.0468	5.2664	0.8014	0.9376	0.7181	3.3912	1.489	2.4941	2.6407	2.1663	1.0534	0.930089	1.6173	2.4003	4.8423	1.867	2.1164	3.516	1.7406	4.2699	4.2969	4.2969
15.8	0.9	0.8508	3.9208	1.3104	0.6744	3.2198	3.7461	1.3126	1.0482	5.2793	0.8029	0.9422	0.7184	3.3909	1.4873	2.5017	2.6426	2.1797	1.0562	0.930576	1.6148	2.3992	4.9105	1.863	2.1235	3.5072	1.7439	4.268	4.2995	4.2995
15.9	0.9023	0.8514	3.9054	1.312	0.6759	3.2325	3.735	1.321	1.0498	5.2952	0.8021	0.9398	0.72	3.3959	1.4938	2.5031	2.6369	2.1944	1.0553	0.930251	1.616	2.398	4.9681	1.8624	2.1291	3.4996	1.749	4.2661	4.2961	4.2961
16	0.9012	0.8518	3.9088	1.3136	0.6757	3.2365	3.7199	1.3259	1.0498	5.2987	0.8042	0.9397	0.7187	3.3884	1.4912	2.5049	2.6367	2.2127	1.0559	0.932685	1.612	2.3938	5.0303	1.8628	2.1372	3.4926	1.7562	4.265	4.2912	4.2912
16.1	0.9008	0.8515	3.9094	1.3127	0.6762	3.2552	3.7049	1.3277	1.0509	5.3037	0.8033	0.9427	0.7229	3.39	1.4931	2.5115	2.6369	2.2248	1.0565	0.931549	1.6144	2.3903	5.0555	1.8611	2.1457	3.4868	1.7648	4.2631	4.2871	4.2871
16.2	0.9029	0.8504	3.9118	1.3159	0.6732	3.2488	3.6924	1.3332	1.0507	5.3012	0.8041	0.9467	0.719	3.3872	1.4946	2.5181	2.635	2.2324	1.0556	0.930576	1.6162	2.3896	5.056	1.8619	2.1573	3.4822	1.7748	4.2631	4.283	4.283
16.3	0.8997	0.8512	3.9047	1.3175	0.6723	3.264	3.6846	1.3414	1.0509	5.3082	0.8009	0.9483	0.7197	3.4058	1.491	2.5224	2.6322	2.2381	1.0562	0.932685	1.621	2.3898	5.0536	1.8592	2.1547	3.4778	1.7856	4.2594	4.2777	4.2777
16.4	0.8999	0.8492	3.8958	1.3201	0.6741	3.2616	3.6784	1.3543	1.0488	5.3173	0.8042	0.9518	0.7181	3.387	1.4921	2.5297	2.627	2.241	1.0565	0.932522	1.6206	2.3871	5.048	1.8589	2.1604	3.4718	1.7965	4.2576	4.2725	4.2725
16.5	0.8975	0.8502	3.8978	1.3163	0.6746	3.2648	3.6784	1.3641	1.0513	5.3132	0.8036	0.9506	0.7197	3.3926	1.4974	2.5309	2.6291	2.2405	1.0588	0.932685	1.6216	2.3818	5.0229	1.8616	2.167	3.466	1.8075	4.2568	4.2661	4.2661
16.6	0.9006	0.8502	3.8931	1.3154	0.6717	3.2686	3.6902	1.3769	1.0504	5.3223	0.8054	0.9521	0.7173	3.3828	1.4948	2.538	2.6284	2.243	1.0594	0.931225	1.6233	2.381	4.9947	1.8664	2.1612	3.4611	1.8192	4.2609	4.2594	4.2594
16.7	0.8996	0.8491	3.8891	1.3169	0.6729	3.2595	3.7027	1.3943	1.0503	5.3127	0.8069	0.9522	0.7201	3.3786	1.4905	2.5398	2.6242	2.2471	1.0623	0.932522	1.6298	2.3806	4.958	1.8649	2.1585	3.4568	1.8287	4.2721	4.2523	4.2523
16.8	0.9031	0.8527	3.8848	1.318	0.6713	3.2632	3.7065	1.412	1.0525	5.3062	0.8096	0.9536	0.7158	3.3864	1.4928	2.5433	2.623	2.2453	1.0636	0.934469	1.6288	2.3821	4.9159	1.8615	2.1552	3.4525	1.8364	4.2676	4.2464	4.2464
16.9	0.8995	0.8486	3.8855	1.318	0.6721	3.2536	3.7187	1.4273	1.0534	5.3017	0.8118	0.955	0.715	3.3842	1.4923	2.5465	2.6188	2.2423	1.0674	0.934793	1.6347	2.3804	4.8711	1.8622	2.149	3.4488	1.8424	4.2598	4.2419	4.2419
17	0.8964	0.8487	3.8825	1.3179	0.6729	3.2469	3.7316	1.4412	1.0528	5.2942	0.8095	0.9554	0.7192	3.385	1.494	2.548	2.6177	2.2347	1.0665	0.937875	1.6391	2.3751	4.8317	1.8624	2.1462	3.4459	1.8473	4.2687	4.2353	4.2353
17.1	0.8973	0.85	3.8772	1.3208	0.6726	3.2442	3.742	1.4468	1.0564	5.2888	0.8098	0.9542	0.7204	3.4041	1.4942	2.5471	2.6125	2.2324	1.0684	0.940633	1.642	2.3751	4.8001	1.8627	2.1462	3.4436	1.8508	4.2665	4.2301	4.2301
17.2	0.8948	0.8495	3.8706	1.323	0.6719	3.2339	3.7528	1.451	1.0565	5.2838	0.8122	0.9548	0.7192	3.403	1.4986	2.5526	2.6154	2.2299	1.0677	0.94339	1.6475	2.3757	4.7905	1.8621	2.1497	3.4422	1.8532	4.2568	4.2264	4.2264
17.3	0.8948	0.8489	3.8729	1.3255	0.6724	3.2243	3.7626	1.4549	1.0577	5.2763	0.8121	0.9528	0.7207	3.4086	1.4997	2.5551	2.6108	2.2224	1.0691	0.945499	1.6503	2.3749	4.8097	1.8621	2.1459	3.4405	1.8553	4.2557	4.2227	4.2227
17.4	0.8943	0.8465	3.8782	1.3255	0.6743	3.2217	3.769	1.4662	1.0603	5.2689	0.8139	0.9567	0.7217	3.4245	1.5026	2.5529	2.6127	2.2189	1.0678	0.944363	1.6548	2.3745	4.8564	1.8616	2.144	3.4399	1.8554	4.2553	4.219	4.219
17.5	0.8972	0.8482	3.8745	1.3242	0.672	3.2066	3.7684	1.4631	1.0633	5.2684	0.8128	0.958	0.7187	3.4236	1.5038	2.5559	2.6112	2.212	1.0704	0.948094	1.6587	2.3764	4.928	1.8601	2.1399	3.441	1.8544	4.2572	4.2165	4.2165
17.6	0.8991	0.8485	3.8742	1.3294	0.6702	3.2061	3.7687	1.4707	1.0648	5.2674	0.8179	0.9577	0.719	3.431	1.5038	2.5569	2.6091	2.201	1.069	0.953285	1.6605	2.3799	5.008	1.8575	2.1358	3.4447	1.8541	4.2605	4.2165	4.2165
17.7	0.8977	0.8494	3.8831	1.3285	0.6676	3.1865	3.7681	1.4672	1.0657	5.2634	0.8175	0.9555	0.7195	3.4308	1.5041	2.5539	2.6081	2.1933	1.0694	0.956042	1.6653	2.3799	5.0908	1.8496	2.1337	3.4502	1.8529	4.2579	4.2231	4.2231
17.8	0.8976	0.8466	3.8802	1.3269	0.6672	3.1854	3.7696	1.4662	1.0679	5.2659	0.8156	0.9559	0.7171	3.4265	1.5076	2.5522	2.6072	2.1847	1.0713	0.956367	1.666	2.381	5.1609	1.8563	2.1336	3.4579	1.8493	4.2561	4.2379	4.2379
17.9	0.8978	0.849	3.8981	1.3337	0.6653	3.1638	3.7757	1.4619	1.0684	5.2758	0.8177	0.9551	0.7196	3.4356	1.5001	2.5561	2.6121	2.1774	1.0678	0.961395	1.6669	2.3808	5.2191	1.8562	2.1322	3.4663	1.8466	4.2691	4.2639	4.2639
18	0.8984	0.8464	3.9098	1.3329	0.6645	3.1641	3.7687	1.4535	1.0719	5.2728	0.8163	0.9554	0.7247	3.4268	1.5031	2.5545	2.6098	2.173	1.07	0.958475	1.6686	2.3839	5.2619	1.8547	2.1301	3.4741	1.843	4.2561	4.3014	4.3014
18.1	0.9035	0.8486	3.9245	1.3347	0.6656	3.144	3.7607	1.4512	1.0725	5.2738	0.8168	0.9523	0.7279	3.4219	1.5111	2.5545	2.6083	2.1694	1.0663	0.962044	1.6668	2.3829	5.2932	1.8541	2.1272	3.4799	1.8387	4.2475	4.3478	4.3478
18.2	0.9028	0.8472	3.9349	1.3321	0.6658	3.1396	3.7556	1.4565	1.0728	5.2823	0.8195	0.954	0.7253	3.4248	1.5021	2.5559	2.6116	2.1694	1.0653	0.961882	1.6667	2.3783	5.3092	1.8524	2.1278	3.4845	1.8342	4.2434	4.3998	4.3998
18.3	0.9056	0.8467	3.9532	1.3384	0.6672	3.1319	3.7525	1.4481	1.0747	5.2813	0.819	0.953	0.727	3.4234	1.5034	2.5531	2.6198	2.177	1.0656	0.963017	1.6663	2.38	5.3223	1.8533	2.1264	3.4877	1.8299	4.2457	4.4523	4.4523
18.4	0.9055	0.8463	3.9657	1.3407	0.6682	3.1064	3.741	1.4437	1.0776	5.2783	0.8184	0.9527	0.7309	3.4044	1.4995	2.5526	2.6257	2.1833	1.0628	0.964964	1.6638	2.3818	5.3374	1.8532	2.1238	3.4897	1.8271	4.2468	4.5	4.5
18.5	0.9045	0.8455	3.9759	1.3382	0.6656	3.112	3.735	1.4408	1.0749	5.2912	0.815	0.9497	0.7261	3.4089	1.4971	2.548	2.6358	2.1849	1.0675	0.961233	1.6643	2.3831	5.3067	1.853	2.1252	3.4903	1.8235	4.2416	4.5423	4.5423
18.6	0.9076	0.8478	3.9793	1.3394	0.6642	3.0956	3.7325	1.4372	1.0775	5.3062	0.819	0.9511	0.7271	3.3985	1.4969	2.5494	2.6456	2.1882	1.0668	0.960746	1.6672	2.384	5.2873	1.8514	2.124	3.4894	1.8188	4.2401	4.5766	4.5766
18.7	0.9053	0.8453	3.9927	1.339	0.6659	3.0764	3.719	1.4302	1.0774	5.3137	0.8155	0.9495	0.7245	3.4033	1.4999	2.5482	2.6573	2.1954	1.0693	0.964315	1.6631	2.3844	5.2629	1.8508	2.1216	3.4857	1.8139	4.2401	4.6049	4.6049
18.8	0.9073	0.846	3.9972	1.3382	0.6645	3.0797	3.7096	1.4307	1.0768	5.3183	0.8196	0.9489	0.7237	3.4069	1.4971	2.5484	2.6695	2.2026	1.0692	0.965775	1.6602	2.3867	5.2329	1.8506	2.1213	3.4802	1.8091	4.2338	4.6256	4.6256
18.9	0.9068	0.8452	4.004	1.3408	0.6669	3.0672	3.7099	1.4325	1.0773	5.2962	0.8193	0.9507	0.7252	3.3985	1.5014	2.5437	2.6811	2.2125	1.0699	0.96399	1.66	2.386	5.1943	1.8476	2.1221	3.4741	1.8048	4.2364	4.641	4.641
19	0.9055	0.8453	4.0078	1.3395	0.6682	3.048	3.7015	1.429	1.0796	5.3037	0.821	0.9506	0.7238	3.4083	1.5041	2.548	2.688	2.2134	1.073	0.964315	1.6616	2.3856	5.1436	1.8478	2.121	3.4677	1.8003	4.2371	4.6494	4.6494
19.1	0.904	0.8474	4.0189	1.3414	0.6689	3.0525	3.7002	1.4216	1.0806	5.3188	0.8207	0.9476	0.7226	3.4112	1.5058	2.5465	2.6977	2.2155	1.0779	0.961233	1.6661	2.3877	5.0955	1.8458	2.1198	3.4611	1.7959	4.2334	4.654	4.654
19.2	0.9055	0.8486	4.0078	1.3402	0.6711	3.0319	3.7049	1.4133	1.0795	5.3198	0.8228	0.9496	0.7262	3.4123	1.5054	2.5486	2.704	2.2152	1.0789	0.957826	1.6657	2.3938	5.0396	1.8448	2.1203	3.4548	1.7917	4.2305	4.6531	4.6531
19.3	0.9064	0.8479	4.0158	1.3412	0.6693	3.0304	3.7171	1.4107	1.0797	5.3213	0.8265	0.9461	0.7243	3.4168	1.5067	2.55	2.7182	2.2114	1.0782	0.962206	1.6657	2.3988	4.9864	1.8437	2.1199	3.4485	1.7869	4.2286	4.6481	4.6481
19.4	0.9067	0.847	4.014	1.3424	0.6702	3.0169	3.7347	1.4127	1.0794	5.3193	0.8249	0.9457	0.7217	3.4174	1.51	2.5455	2.7243	2.2099	1.0787	0.963179	1.6689	2.4001	4.9321	1.8435	2.1174	3.4407	1.7827	4.2286	4.6381	4.6381
19.5	0.9049	0.8492	4.0275	1.3452	0.6682	3.011	3.7534	1.4065	1.0771	5.3122	0.8251	0.9443	0.7221	3.4273	1.5108	2.5451	2.7298	2.2061	1.0812	0.963017	1.6709	2.4005	4.8822	1.8433	2.1196	3.433	1.7796	4.232	4.624	4.624
19.6	0.9061	0.8486	4.0175	1.3448	0.6693	3.0059	3.7808	1.4022	1.0794	5.3168	0.8267	0.9452	0.7186	3.4313	1.5141	2.5449	2.7426	2.203	1.0835	0.963828	1.6745	2.4049	4.833	1.8433	2.1169	3.4265	1.7761	4.2338	4.6062	4.6062
19.7	0.9052	0.8502	4.013	1.3446	0.6679	2.9932	3.8101	1.4004	1.0787	5.3067	0.8253	0.9437	0.7186	3.4271	1.515	2.5514	2.7424	2.1949	1.0831	0.965775	1.6797	2.4036	4.7905	1.8417	2.1086	3.4205	1.7722	4.2457	4.586	4.586
19.8	0.9032	0.8492	4.0154	1.3433	0.6683	2.9915	3.8319	1.4067	1.0806	5.3097	0.8276	0.9438	0.7192	3.4356	1.5165	2.5475	2.7486	2.1928	1.0815	0.961557	1.6825	2.4034	4.7537	1.8418	2.1096	3.4149	1.7688	4.2427	4.5647	4.5647
19.9	0.9017	0.8526	4.0196	1.3466	0.6662	2.9794	3.8538	1.4085	1.0782	5.3057	0.8278	0.9418	0.7176	3.4302	1.52	2.5541	2.7503	2.1879	1.0824	0.963504	1.6876	2.4028	4.7212	1.839	2.1152	3.4095	1.7648	4.2431	4.5464	4.5464
20	0.9014	0.8531	4.0248	1.3493	0.6692	2.9707	3.8749	1.4121	1.0814	5.3122	0.8264	0.9429	0.718	3.4251	1.5207	2.558	2.7514	2.1849	1.0845	0.960584	1.6855	2.4041	4.6914	1.8403	2.112	3.4052	1.7606	4.2553	4.527	4.527
20.1	0.8998	0.8518	4.0147	1.3491	0.6685	2.9661	3.8891	1.4155	1.0813	5.3243	0.8259	0.9379	0.7183	3.429	1.5238	2.5529	2.7525	2.1809	1.0833	0.96253	1.689	2.4063	4.6665	1.8393	2.1106	3.4002	1.7564	4.2594	4.5064	4.5064
20.2	0.8976	0.8519	4.0199	1.3485	0.6676	2.9549	3.8997	1.4204	1.0808	5.3323	0.826	0.9389	0.718	3.4356	1.5229	2.5539	2.7543	2.1723	1.0841	0.960908	1.6891	2.4076	4.6611	1.8391	2.1081	3.3943	1.7529	4.2624	4.4884	4.4884
20.3	0.8992	0.8512	4.0151	1.3477	0.6699	2.9486	3.9111	1.4236	1.0817	5.3526	0.8264	0.9375	0.72	3.4251	1.5188	2.56	2.7541	2.1704	1.0842	0.959124	1.6926	2.4068	4.6825	1.8363	2.1082	3.3886	1.75	4.2725	4.4701	4.4701
20.4	0.8981	0.8547	4.0147	1.3478	0.6676	2.9429	3.9215	1.4245	1.0825	5.3688	0.8261	0.9366	0.7212	3.4254	1.5212	2.5617	2.7554	2.1661	1.0817	0.960746	1.6927	2.4099	4.7374	1.8358	2.1044	3.3836	1.7473	4.2725	4.4527	4.4527
20.5	0.8959	0.8544	4.0168	1.3493	0.6692	2.9362	3.9359	1.4312	1.0832	5.381	0.8253	0.9362	0.72	3.4367	1.5276	2.5625	2.761	2.1578	1.0837	0.957664	1.6977	2.4113	4.8233	1.8366	2.102	3.3791	1.746	4.2841	4.4366	4.4366
20.6	0.8968	0.8558	4.0192	1.3517	0.6689	2.9284	3.9379	1.4325	1.0836	5.4015	0.8233	0.9349	0.7204	3.4273	1.53	2.5676	2.7603	2.1524	1.0792	0.959286	1.6995	2.4126	4.9235	1.8364	2.0929	3.3746	1.7453	4.2912	4.4225	4.4225
20.7	0.8949	0.8554	4.0279	1.3535	0.6688	2.9199	3.94	1.4321	1.085	5.4097	0.8245	0.9331	0.722	3.4112	1.5309	2.5717	2.7685	2.1488	1.081	0.956529	1.7043	2.4163	5.028	1.8342	2.0822	3.3707	1.746	4.2995	4.4104	4.4104
20.8	0.8942	0.8564	4.0279	1.3535	0.6676	2.9161	3.9396	1.4363	1.0849	5.4324	0.8241	0.9302	0.7217	3.4129	1.5332	2.5697	2.7784	2.1435	1.0792	0.957178	1.7051	2.4229	5.1221	1.8278	2.0667	3.3668	1.7479	4.309	4.3991	4.3991
20.9	0.8994	0.8587	4.0341	1.3563	0.671	2.9097	3.9366	1.4369	1.0852	5.4397	0.8259	0.9307	0.7209	3.401	1.5382	2.5759	2.7824	2.1368	1.0783	0.957664	1.7107	2.4283	5.1991	1.8289	2.0524	3.3627	1.748	4.3139	4.3878	4.3878
21	0.9001	0.8575	4.0366	1.3525	0.6696	2.9029	3.9299	1.4351	1.0842	5.4547	0.8226	0.9263	0.7209	3.38	1.5378	2.5779	2.7878	2.1346	1.0786	0.960908	1.7125	2.4308	5.254	1.8321	2.0358	3.3579	1.7489	4.3154	4.3785	4.3785
21.1	0.9002	0.8587	4.0432	1.3522	0.6686	2.8945	3.9252	1.4376	1.085	5.4724	0.8196	0.9216	0.7212	3.3721	1.5407	2.5804	2.7963	2.1257	1.0762	0.958637	1.7159	2.4388	5.3027	1.8312	2.025	3.3535	1.7511	4.3184	4.3704	4.3704
21.2	0.9036	0.8566	4.0586	1.3547	0.6691	2.8879	3.9275	1.4378	1.0852	5.4866	0.8198	0.9231	0.7196	3.3585	1.5404	2.5854	2.8018	2.1286	1.0807	0.960746	1.7186	2.4413	5.3349	1.8309	2.0202	3.3496	1.7539	4.3162	4.3647	4.3647
21.3	0.9015	0.8548	4.0726	1.356	0.6709	2.8807	3.9255	1.4358	1.0857	5.4845	0.8242	0.9214	0.7204	3.3549	1.5443	2.5866	2.8047	2.1221	1.0812	0.957664	1.7169	2.4415	5.3313	1.8293	2.015	3.346	1.7573	4.3181	4.3604	4.3604
21.4	0.9045	0.8569	4.0768	1.3543	0.6694	2.8765	3.9168	1.4361	1.0851	5.4965	0.8237	0.919	0.7212	3.373	1.5399	2.587	2.8088	2.1198	1.0845	0.959773	1.7246	2.4468	5.3298	1.8286	2.0066	3.3433	1.7615	4.3116	4.362	4.362
21.5	0.9077	0.8578	4.0828	1.3576	0.6686	2.8725	3.9057	1.4321	1.0836	5.5023	0.8221	0.9148	0.7216	3.3909	1.5411	2.5922	2.8054	2.1221	1.0906	0.958475	1.7263	2.4507	5.3203	1.829	2.0025	3.3405	1.7671	4.3093	4.37	4.37
21.6	0.9086	0.8548	4.0924	1.3583	0.6646	2.867	3.8944	1.4344	1.0848	5.5325	0.819	0.9129	0.7227	3.4143	1.5447	2.5902	2.8076	2.1247	1.0903	0.959286	1.7287	2.4531	5.3042	1.8281	2.0051	3.3383	1.7717	4.3101	4.3824	4.3824
21.7	0.9114	0.8532	4.0888	1.3604	0.6683	2.8646	3.8891	1.4287	1.0842	5.5208	0.8176	0.9146	0.7219	3.4345	1.544	2.5906	2.8092	2.122	1.0945	0.962368	1.7298	2.4537	5.2763	1.8247	1.9934	3.3347	1.7805	4.3063	4.3998	4.3998
21.8	0.913	0.8522	4.0959	1.3592	0.6675	2.86	3.8841	1.4239	1.083	5.5319	0.8166	0.9129	0.7221	3.4594	1.5456	2.5899	2.8058	2.1284	1.0984	0.959448	1.7298	2.4556	5.2338	1.8271	1.9886	3.3317	1.7924	4.3059	4.4229	4.4229
21.9	0.912	0.853	4.097	1.3605	0.6676	2.8628	3.8782	1.4174	1.0822	5.5208	0.8197	0.908	0.7231	3.4747	1.5427	2.5889	2.8067	2.1329	1.0975	0.959611	1.7305	2.4602	5.186	1.8271	1.9905	3.3289	1.7985	4.3014	4.4476	4.4476
22	0.9128	0.8534	4.0931	1.3596	0.6665	2.8681	3.864	1.4131	1.0825	5.5272	0.8202	0.9082	0.72	3.5381	1.5366	2.5885	2.8029	2.1402	1.0984	0.961719	1.7276	2.4663	5.1297	1.8283	1.9913	3.3259	1.8053	4.2995	4.4733	4.4733
22.1	0.9151	0.8528	4.0874	1.3597	0.6655	2.8742	3.8499	1.4126	1.0827	5.5277	0.8223	0.9093	0.7231	3.5437	1.5358	2.5843	2.8076	2.1447	1.0987	0.966586	1.7288	2.4766	5.0766	1.8302	1.9895	3.3232	1.8119	4.3014	4.4988	4.4988
22.2	0.9161	0.8502	4.0902	1.3626	0.6679	2.8793	3.8352	1.4099	1.0811	5.5266	0.8215	0.9075	0.7208	3.5366	1.5359	2.5897	2.8058	2.1457	1.1016	0.966261	1.7315	2.4915	5.0215	1.8323	1.9827	3.3204	1.8163	4.301	4.5245	4.5245
22.3	0.9161	0.8502	4.0892	1.3643	0.6655	2.8837	3.8199	1.4075	1.0823	5.5224	0.8224	0.9064	0.7204	3.5464	1.5345	2.5829	2.8052	2.1483	1.1021	0.966748	1.7288	2.5083	4.9681	1.8333	1.9787	3.3174	1.8221	4.2871	4.5488	4.5488
22.4	0.9139	0.8474	4.0768	1.3687	0.6655	2.8905	3.805	1.4063	1.0827	5.5277	0.8288	0.9063	0.7222	3.5401	1.5432	2.5858	2.8056	2.1476	1.1006	0.968532	1.7259	2.522	4.9199	1.8329	1.9755	3.3125	1.8287	4.2807	4.568	4.568
22.5	0.9151	0.8495	4.0687	1.3627	0.6664	2.8968	3.7959	1.4017	1.0827	5.5357	0.8387	0.9054	0.7205	3.5366	1.6039	2.5841	2.8122	2.1502	1.0997	0.967883	1.7293	2.5343	4.8662	1.8344	1.9742	3.309	1.8381	4.2796	4.5831	4.5831
22.6	0.919	0.8449	4.0659	1.3657	0.665	2.9001	3.7837	1.3996	1.0803	5.5213	0.8353	0.905	0.7218	3.541	1.5479	2.5893	2.8172	2.1507	1.0984	0.968856	1.7242	2.5475	4.8167	1.836	1.975	3.3057	1.8508	4.2871	4.5942	4.5942
22.7	0.9194	0.8444	4.0603	1.4353	0.6662	2.9069	3.7677	1.4005	1.0808	5.4777	0.8188	0.9024	0.7245	3.5576	1.5466	2.5875	2.8229	2.1536	1.0963	0.969667	1.7232	2.5545	4.7758	1.8364	1.9793	3.3035	1.8678	4.2785	4.6008	4.6008
22.8	0.919	0.8459	4.0575	1.448	0.6646	2.9102	3.7572	1.3974	1.0792	5.495	0.8046	0.9023	0.7226	3.5544	1.5979	2.5929	2.8292	2.1581	1.0948	0.970965	1.7205	2.5635	4.7413	1.8384	1.978	3.3027	1.8869	4.2702	4.5991	4.5991
22.9	0.9145	0.8468	4.0446	1.4342	0.6649	2.9147	3.7423	1.3946	1.0798	5.5008	0.7939	0.9017	0.7212	3.5366	1.6049	2.6003	2.8359	2.1545	1.0902	0.972587	1.7225	2.5763	4.716	1.839	1.9777	3.3049	1.9088	4.268	4.595	4.595
23	0.9129	0.8473	4.0397	1.4431	0.6644	2.9168	3.7306	1.3923	1.079	5.4563	0.7938	0.8965	0.7232	3.5538	1.6044	2.6066	2.8361	2.1561	1.0859	0.974047	1.7186	2.5827	4.6863	1.8403	1.9768	3.3114	1.9305	4.2643	4.5872	4.5872
23.1	0.911	0.8475	4.0421	1.4609	0.6643	2.9166	3.7209	1.3901	1.0776	5.4918	0.8	0.8949	0.7259	3.5639	1.6039	2.6131	2.8356	2.153	1.0887	0.971776	1.7176	2.5848	4.6623	1.8417	1.9773	3.3265	1.9526	4.2628	4.577	4.577
23.2	0.913	0.8591	4.0345	1.4791	0.6659	2.9196	3.703	1.3878	1.0749	5.4677	0.802	0.896	0.7237	3.5514	1.5893	2.62	2.8354	2.1492	1.0848	0.975831	1.719	2.5879	4.6448	1.842	1.9788	3.3549	1.9739	4.2598	4.5643	4.5643
23.3	0.9139	0.8933	4.0362	1.4799	0.6669	2.9206	3.6987	1.3886	1.0748	5.4751	0.8037	0.8941	0.7253	3.5381	1.5842	2.6236	2.8318	2.1507	1.0715	0.975182	1.7186	2.5823	4.626	1.8417	1.9768	3.3982	1.9939	4.2602	4.5505	4.5505
23.4	0.9139	0.91	4.0338	1.4836	0.6629	2.9135	3.693	1.3865	1.0746	5.4892	0.8042	0.8933	0.7212	3.5286	1.5959	2.6316	2.8302	2.1528	1.0552	0.975182	1.7176	2.581	4.6082	1.8394	1.9734	3.4542	2.0109	4.2639	4.5359	4.5359
23.5	0.9126	0.8963	4.0314	1.4905	0.6619	2.9116	3.6843	1.3843	1.0748	5.4897	0.7928	0.8934	0.7208	3.5228	1.5979	2.6377	2.8281	2.1473	1.0643	0.97502	1.7158	2.5831	4.5909	1.8408	1.9695	3.5192	2.0267	4.2691	4.5213	4.5213
23.6	0.9114	0.8871	4.0178	1.4892	0.6627	2.9083	3.6831	1.3805	1.0744	5.5071	0.7579	0.8898	0.7217	3.4923	1.5563	2.6369	2.8276	2.1442	1.0668	0.976318	1.716	2.5837	4.5753	1.8415	1.9633	3.5884	2.0384	4.2777	4.5073	4.5073
23.7	0.9121	0.9063	4.013	1.4908	0.6613	2.9059	3.685	1.3825	1.0725	5.5537	0.682	0.8931	0.7244	3.4747	1.5228	2.6462	2.8174	2.1456	1.0527	0.974047	1.7153	2.5835	4.5639	1.8399	1.9647	3.655	2.0473	4.2803	4.4936	4.4936
23.8	0.9132	0.9176	4.0013	1.4594	0.6606	2.902	3.6937	1.3794	1.0746	5.5778	0.6984	0.8932	0.7232	3.4508	1.5158	2.6475	2.8124	2.148	1.0402	0.972425	1.7146	2.5841	4.5492	1.8403	1.9595	3.7187	2.0567	4.2958	4.4817	4.4817
23.9	0.9148	0.92	3.9999	1.4235	0.6613	2.8991	3.7071	1.3802	1.0729	5.5929	0.7557	0.892	0.7275	3.4339	1.5173	2.6484	2.8054	2.1444	1.0381	0.972587	1.7148	2.5841	4.5383	1.8397	1.954	3.778	2.0644	4.3101	4.4701	4.4701
24	0.9132	0.9226	4.0009	1.2919	0.6612	2.89	3.7215	1.3806	1.0756	5.5961	0.7657	0.8957	0.7239	3.4183	1.514	2.6486	2.7991	2.1416	1.0423	0.972101	1.7176	2.5843	4.531	1.8393	1.9512	3.8384	2.0689	4.32	4.4606	4.4606
24.1	0.9127	0.9273	3.9978	1.1568	0.6616	2.8858	3.7325	1.3767	1.075	5.6037	0.7741	0.8932	0.7236	3.4143	1.5116	2.6479	2.7927	2.1354	1.0493	0.970803	1.7212	2.5899	4.5173	1.8385	1.945	3.8911	2.0694	4.331	4.4539	4.4539
24.2	0.9137	0.9263	3.9876	1.5187	0.6625	2.8818	3.7506	1.3768	1.0749	5.6048	0.7786	0.8917	0.7249	3.4036	1.5081	2.6488	2.7871	2.1363	1.0553	0.97129	1.729	2.5922	4.5036	1.8372	1.9432	3.9336	2.0717	4.3432	4.4519	4.4519
24.3	0.9093	0.9283	3.9845	1.5262	0.6614	2.8825	3.7681	1.3761	1.0757	5.6091	0.8524	0.8938	0.7239	3.4036	1.5079	2.6435	2.7826	2.1336	1.0585	0.974047	1.7298	2.5958	4.494	1.8361	1.9414	3.9688	2.0714	4.3531	4.4547	4.4547
24.4	0.9115	0.9286	3.9838	1.5288	0.6609	2.8772	3.7751	1.3747	1.0776	5.627	0.8828	0.8987	0.7227	3.4132	1.5059	2.6445	2.7768	2.1322	1.0605	0.971127	1.7324	2.6041	4.4884	1.8353	1.9411	3.9992	2.0699	4.3639	4.4705	4.4705
24.5	0.9118	0.9291	3.9869	1.534	0.6609	2.8795	3.7914	1.3759	1.0805	5.6302	0.8889	0.8992	0.7196	3.4245	1.4994	2.6409	2.7717	2.1317	1.0646	0.969667	1.7318	2.6146	4.4821	1.833	1.9436	4.0116	2.0671	4.3704	4.4928	4.4928
24.6	0.9122	0.9288	3.9828	1.54	0.6622	2.8842	3.7982	1.3761	1.082	5.5837	0.8901	0.8971	0.7251	3.4254	1.5011	2.6422	2.767	2.1317	1.0666	0.972101	1.7338	2.632	4.4773	1.8338	1.9432	4.0127	2.0633	4.3781	4.5233	4.5233
24.7	0.9075	0.93	3.9858	1.5422	0.6622	2.8814	3.8092	1.3732	1.0825	5.4433	0.8914	0.8995	0.7267	3.4239	1.4946	2.6348	2.7643	2.1308	1.0665	0.969343	1.7345	2.655	4.4721	1.8333	1.9461	4.0085	2.0611	4.3766	4.5602	4.5602
24.8	0.9075	0.9355	3.9817	1.5432	0.6607	2.8851	3.8088	1.3787	1.0846	5.3218	0.8899	0.9009	0.7279	3.4396	1.4974	2.6333	2.7585	2.1274	1.0658	0.967072	1.7375	2.6744	4.4646	1.8324	1.9477	3.9978	2.0671	4.3809	4.6004	4.6004
24.9	0.9074	0.9371	3.9753	1.5508	0.6596	2.8891	3.8147	1.3817	1.0881	5.3663	0.8912	0.8998	0.7284	3.462	1.4941	2.6322	2.7554	2.1278	1.0646	0.967559	1.7412	2.701	4.4559	1.8311	1.9472	3.9776	2.0737	4.3855	4.6377	4.6377
25	0.9069	0.9396	3.9773	1.5499	0.6642	2.8949	3.814	1.3818	1.0858	5.3953	0.8466	0.902	0.7283	3.49	1.4928	2.6295	2.7523	2.1244	1.0646	0.969992	1.7402	2.7256	4.4543	1.8305	1.9455	3.9518	2.0824	4.3898	4.6712	4.6712
25.1	0.9059	0.9392	3.993	1.5523	0.6612	2.8945	3.8169	1.387	1.088	5.3334	0.7855	0.8989	0.7262	3.5201	1.4953	2.6282	2.7419	2.1232	1.0642	0.965775	1.7433	2.7503	4.4472	1.8306	1.9422	3.9228	2.0926	4.3859	4.699	4.699
25.2	0.9024	0.9426	4.002	1.5552	0.6623	2.9034	3.8131	1.3861	1.088	5.2649	0.785	0.9058	0.73	3.5416	1.4891	2.6223	2.7432	2.1184	1.0618	0.964152	1.7499	2.7697	4.4417	1.8295	1.9413	3.8934	2.1032	4.3847	4.7203	4.7203
25.3	0.9029	0.9447	3.9811	1.5569	0.661	2.905	3.814	1.3909	1.0888	5.2016	0.7865	0.9036	0.7539	3.5621	1.4917	2.6257	2.7382	2.1206	1.063	0.961719	1.75	2.7858	4.4413	1.8298	1.9383	3.8643	2.1148	4.3836	4.7348	4.7348
25.4	0.9006	0.9454	4.0589	1.5594	0.6605	2.9081	3.805	1.3986	1.089	5.159	0.7852	0.9475	0.7539	3.5797	1.4915	2.6249	2.7327	2.1167	1.0637	0.96399	1.7551	2.8002	4.4401	1.8284	1.9374	3.8361	2.1237	4.3805	4.7404	4.7404
25.5	0.9031	0.9472	4.0768	1.5595	0.6614	2.9097	3.8069	1.4015	1.087	5.1374	0.7843	0.9734	0.7612	3.5948	1.4923	2.6207	2.7322	2.1142	1.0618	0.962855	1.7587	2.8085	4.4315	1.8278	1.935	3.8095	2.1307	4.3739	4.7421	4.7421
25.6	0.9049	0.9454	4.0603	1.5576	0.6637	2.9192	3.7943	1.4055	1.0918	4.9462	0.7858	0.9797	0.8348	3.6077	1.492	2.6215	2.7338	2.1147	1.0597	0.964315	1.7574	2.8147	4.4248	1.8286	1.9335	3.785	2.1356	4.372	4.7404	4.7404
25.7	0.9038	0.9432	4.1108	1.5563	0.6614	2.9322	3.7885	1.4103	1.0911	4.8032	0.7897	0.9735	0.8406	3.6108	1.4883	2.62	2.7358	2.1152	1.0584	0.963179	1.7623	2.821	4.4189	1.8284	1.9296	3.7626	2.1389	4.3631	4.7348	4.7348
25.8	0.9057	0.9489	4.1226	1.5559	0.6599	2.9386	3.7889	1.4153	1.0907	4.958	0.8385	0.9198	0.8477	3.6293	1.4901	2.6165	2.7366	2.1084	1.0564	0.962206	1.7609	2.8213	4.4123	1.8274	1.9313	3.7407	2.1394	4.36	4.7259	4.7259
25.9	0.9048	0.9554	4.1244	1.5561	0.6619	2.9601	3.7754	1.5009	1.093	4.8742	0.9274	0.9084	0.819	3.6281	1.4938	2.6175	2.7399	2.1069	1.0555	0.964315	1.7567	2.8238	4.4076	1.8246	1.9296	3.7209	2.1438	4.3539	4.7118	4.7118
26	0.9032	0.9605	4.1434	1.559	0.6647	2.9813	3.7671	1.5316	1.0946	4.4682	0.9364	0.9127	0.7607	3.6433	1.4958	2.6125	2.7355	2.105	1.0547	0.965288	1.759	2.8233	4.4053	1.8218	1.9293	3.7071	2.1459	4.3539	4.6957	4.6957
26.1	0.9062	0.9594	4.1499	1.5558	0.6646	2.9974	3.7623	1.5366	1.0958	4.1679	0.931	0.9352	0.7429	3.6476	1.4985	2.6165	2.7375	2.1042	1.0541	0.969992	1.759	2.8265	4.4002	1.8278	1.928	3.6996	2.148	4.3462	4.6783	4.6783
26.2	0.9028	0.963	4.1643	1.5577	0.6615	3.0208	3.7515	1.54	1.0967	4.2969	0.9204	0.9713	0.7656	3.6464	1.4985	2.6154	2.7322	2.1071	1.0536	0.967559	1.7564	2.8336	4.3956	1.828	1.9283	3.6999	2.1492	4.347	4.6598	4.6598
26.3	0.9017	0.9746	4.1803	1.5595	0.658	3.0477	3.7363	1.5398	1.0965	5.0827	0.923	0.9744	0.7796	3.6449	1.506	2.6118	2.7342	2.1099	1.0513	0.968856	1.7526	2.845	4.3952	1.8296	1.9254	3.7096	2.1562	4.3459	4.6414	4.6414
26.4	0.9041	0.981	4.1897	1.56	0.6571	3.0657	3.7284	1.5399	1.0944	5.4107	0.9219	0.9573	0.7929	3.6394	1.511	2.6116	2.7278	2.117	1.0499	0.96983	1.7546	2.8605	4.3843	1.8298	1.9262	3.73	2.1647	4.3443	4.6227	4.6227
26.5	0.9028	0.9747	4.2022	1.5659	0.6557	3.0877	3.7256	1.4995	1.0955	5.566	0.9148	0.9771	0.7995	3.6436	1.5107	2.6133	2.7307	2.125	1.0481	0.970154	1.7536	2.8769	4.3785	1.8299	1.9223	3.7588	2.1692	4.3401	4.6053	4.6053
26.6	0.9021	0.9837	4.1985	1.5716	0.6626	3.1097	3.7187	1.429	1.0977	5.4386	0.9102	0.9818	0.7955	3.6262	1.5129	2.6129	2.7316	2.1404	1.0511	0.972425	1.7553	2.8919	4.3747	1.829	1.919	3.7918	2.1736	4.3466	4.5893	4.5893
26.7	0.9014	1.0047	4.208	1.5753	0.7426	3.1227	3.704	1.4266	1.096	5.2575	0.9196	0.9811	0.8103	3.6308	1.5122	2.6114	2.7316	2.1555	1.0494	0.974371	1.7533	2.9118	4.3704	1.8305	1.9235	3.826	2.1765	4.3478	4.5753	4.5753
26.8	0.9032	1.0051	4.2139	1.5784	0.764	3.134	3.6946	1.4219	1.0932	4.844	0.9262	0.9776	0.8164	3.6065	1.5181	2.6127	2.7377	2.1755	1.0484	0.975182	1.7501	2.9267	4.367	1.8305	1.9272	3.8581	2.1776	4.3497	4.5614	4.5614
26.9	0.9013	1.0098	4.2135	1.5835	0.764	3.1522	3.6902	1.4267	1.0925	4.5749	0.924	0.974	0.8184	3.5746	1.5224	2.6123	2.7393	2.1828	1.0466	0.97794	1.7486	2.9415	4.3631	1.8305	1.926	3.8845	2.1765	4.3451	4.5488	4.5488
27	0.9016	1.0092	4.2183	1.5883	0.765	3.1545	3.6912	1.4319	1.0918	4.5201	0.9321	0.9696	0.8042	3.5633	1.5223	2.6133	2.7413	2.2021	1.0468	0.978264	1.7479	2.9462	4.3593	1.8301	1.9277	3.9044	2.1749	4.3443	4.5391	4.5391
27.1	0.9012	1.0096	4.1897	1.5894	0.7659	3.1672	3.698	1.4312	1.0929	4.9708	0.9319	0.9631	0.8107	3.5544	1.5252	2.6098	2.7408	2.2077	1.0505	0.979075	1.7425	2.9491	4.3558	1.8309	1.9272	3.9191	2.1732	4.3401	4.529	4.529
27.2	0.9035	1.01	4.1912	1.5923	0.7667	3.1667	3.7065	1.4287	1.0891	5.2768	0.9283	0.9634	0.832	3.5325	1.5228	2.6129	2.7388	2.2196	1.0488	0.977778	1.7403	2.9549	4.3505	1.8301	1.9279	3.9295	2.1711	4.3359	4.5181	4.5181
27.3	0.9029	1.0151	4.2011	1.597	0.7632	3.1708	3.7127	1.435	1.0902	5.1264	0.9227	0.9571	0.8355	3.5233	1.5247	2.6098	2.7382	2.2242	1.0455	0.979075	1.7382	2.9563	4.3474	1.8312	1.9262	3.9302	2.167	4.3501	4.5077	4.5077
27.4	0.9003	1.0239	4.1981	1.5972	0.7589	3.1732	3.7246	1.4734	1.0851	5.3526	0.9197	0.9531	0.8237	3.5378	1.5251	2.6074	2.7327	2.2312	1.0442	0.982644	1.7425	2.9589	4.3432	1.8314	1.9268	3.9305	2.1623	4.3409	4.4996	4.4996
27.5	0.8988	1.0351	4.2066	1.5966	0.7588	3.1719	3.7379	1.5367	1.0894	5.5341	0.9108	0.9494	0.8223	3.5434	1.5303	2.6051	2.7355	2.2315	1.0483	0.984753	1.7403	2.9613	4.3386	1.8326	1.9249	3.9238	2.1612	4.3382	4.492	4.492
27.6	0.9032	1.0327	4.2113	1.5996	0.7605	3.175	3.7506	1.5822	1.0892	5.5192	0.9138	0.9411	0.8251	3.5461	1.5354	2.6077	2.7364	2.233	1.0435	0.984266	1.7393	2.9616	4.3333	1.832	1.926	3.9098	2.1657	4.331	4.4853	4.4853
27.7	0.9029	1.0376	4.2165	1.6008	0.7562	3.1664	3.7674	1.6329	1.0893	5.4459	0.9212	0.9455	0.8153	3.5675	1.5339	2.6095	2.7331	2.2344	1.0445	0.986861	1.7365	2.9611	4.3302	1.833	1.9246	3.8924	2.1751	4.3329	4.4789	4.4789
27.8	0.9011	1.0399	4.2179	1.6001	0.7554	3.1677	3.7847	1.6462	1.0888	5.3414	0.9189	0.9548	0.76	3.5767	1.5337	2.6108	2.7318	2.2335	1.0461	0.986212	1.7345	2.9544	4.326	1.8336	1.9265	3.8735	2.1921	4.3272	4.4733	4.4733
27.9	0.9003	1.0365	4.2205	1.5956	0.7567	3.1618	3.7985	1.611	1.0867	5.3455	0.9215	0.9598	0.7459	3.5911	1.5354	2.6152	2.7344	2.2297	1.0439	0.987835	1.7341	2.9484	4.3219	1.8333	1.9299	3.8525	2.2132	4.3234	4.4666	4.4666
28	0.9012	1.0275	4.2227	1.5945	0.7571	3.1507	3.8121	1.5427	1.0866	5.3678	0.912	0.9568	0.73	3.6011	1.5364	2.6223	2.732	2.2283	1.0436	0.984753	1.7334	2.9379	4.3219	1.8336	1.9293	3.8306	2.2376	4.3196	4.4622	4.4622
28.1	0.9015	1.0279	4.2205	1.6	0.7589	3.1512	3.8156	1.5438	1.091	5.4329	0.9062	0.9518	0.7033	3.6102	1.5372	2.6232	2.7375	2.2285	1.0418	0.984428	1.731	2.9331	4.3169	1.8339	1.928	3.8101	2.2588	4.3226	4.4571	4.4571
28.2	0.9018	1.0374	4.1905	1.5963	0.7589	3.1368	3.8208	1.5682	1.0895	5.4819	0.8983	0.9522	0.703	3.618	1.5363	2.6236	2.7311	2.2207	1.0438	0.987348	1.7317	2.9244	4.3143	1.8324	1.9266	3.7914	2.2755	4.3188	4.4535	4.4535
28.3	0.9032	1.0461	4.1041	1.596	0.7559	3.1301	3.8221	1.5872	1.0926	5.4897	0.8993	0.9569	0.7042	3.6336	1.5382	2.6299	2.7314	2.2139	1.0423	0.983779	1.727	2.9168	4.3097	1.8332	1.9262	3.7764	2.2899	4.3165	4.4504	4.4504
28.4	0.9036	1.0501	4.0037	1.5902	0.7493	3.1273	3.8244	1.628	1.0907	5.5618	0.8923	0.9612	0.6189	3.6378	1.5381	2.628	2.7294	2.2123	1.0443	0.983293	1.7205	2.909	4.3041	1.8326	1.9268	3.7626	2.3035	4.3124	4.4468	4.4468
28.5	0.9016	1.0529	3.9787	1.5877	0.7444	3.1148	3.8251	1.6176	1.091	5.5113	0.8964	0.9605	0.5795	3.6394	1.5387	2.6331	2.7285	2.2035	1.0419	0.98459	1.7242	2.902	4.3219	1.8311	1.9245	3.7496	2.3151	4.3116	4.4441	4.4441
28.6	0.9039	1.0569	3.9852	1.5843	0.7532	3.1064	3.8228	1.6003	1.0923	5.8338	0.9387	0.9505	0.5164	3.6339	1.5386	2.6337	2.7327	2.2009	1.0426	0.98605	1.721	2.8987	4.3112	1.8308	1.9245	3.7373	2.3246	4.3078	4.4417	4.4417
28.7	0.9029	1.0665	3.9985	1.7553	0.7554	3.1026	3.8169	1.6033	1.0904	5.8799	0.9328	0.951	0.5356	3.6253	1.539	2.6394	2.7213	2.1958	1.0402	0.986861	1.7236	2.893	4.2965	1.8284	1.9226	3.7246	2.3294	4.3056	4.4393	4.4393
28.8	0.9015	1.0726	4.0127	1.7533	0.7622	3.0867	3.8147	1.6097	1.0916	5.8677	0.9058	0.9568	0.607	3.6211	1.5389	2.6424	2.7224	2.1884	1.0405	0.985726	1.7228	2.8837	4.2897	1.8287	1.9192	3.7146	2.332	4.3109	4.4366	4.4366
28.9	0.9002	1.0682	4.0369	1.7501	0.7668	3.083	3.8034	1.5846	1.0911	5.7601	0.9026	0.9577	0.5844	3.6171	1.5339	2.645	2.7221	2.1842	1.0417	0.987997	1.7169	2.8774	4.2886	1.8287	1.9192	3.7068	2.3324	4.3029	4.435	4.435
29	0.9011	1.0625	4.0621	1.7486	0.7702	3.0747	3.7975	1.5436	1.093	5.7861	0.9179	0.9528	0.5113	3.6032	1.5386	2.6492	2.7213	2.176	1.0427	0.98605	1.7124	2.87	4.2841	1.8278	1.9179	3.699	2.3305	4.301	4.4323	4.4323
29.1	0.9017	1.0634	4.0526	1.7479	0.766	3.0624	3.7892	1.4977	1.0914	5.8333	0.9445	0.9419	0.5094	3.6035	1.5435	2.646	2.7191	2.1696	1.0429	0.988808	1.7101	2.8584	4.2725	1.8275	1.9158	3.6924	2.3255	4.2995	4.4299	4.4299
29.2	0.9019	1.0772	3.9828	1.7425	0.7711	3.0589	3.785	1.5164	1.0896	5.8857	0.9675	0.9367	0.6275	3.5848	1.54	2.6392	2.718	2.1692	1.0409	0.988646	1.7155	2.8519	4.2747	1.8255	1.915	3.6884	2.3185	4.298	4.4279	4.4279
29.3	0.8979	1.0766	3.9396	1.7403	0.7722	3.047	3.7783	1.5646	1.0918	6.0301	1.00225	0.9406	0.6857	3.5857	1.5376	2.6382	2.7193	2.1668	1.0416	0.993512	1.7174	2.8425	4.2714	1.8252	1.9132	3.685	2.3101	4.2976	4.4256	4.4256
29.4	0.9027	1.0736	3.8808	1.7382	0.7689	3.0354	3.7767	1.5783	1.0897	6.1095	1.0556	0.9559	0.6997	3.5642	1.5349	2.6348	2.713	2.1638	1.0401	0.992539	1.7146	2.8338	4.2691	1.8243	1.9104	3.6834	2.3016	4.3033	4.426	4.426
29.5	0.9039	1.0735	3.778	1.7425	0.7713	3.0262	3.7604	1.5425	1.0888	6.2216	0.8808	0.975	0.676	3.555	1.5334	2.6358	2.7134	2.159	1.0415	0.992214	1.7162	2.8286	4.265	1.8234	1.9094	3.6831	2.2956	4.3048	4.4225	4.4225
29.6	0.9045	1.0705	3.7461	1.7403	0.7708	3.0199	3.7572	1.5034	1.0894	6.3542	0.816	0.9835	0.6895	3.5467	1.5351	2.6405	2.7106	2.1533	1.042	0.989943	1.7156	2.8192	4.2635	1.8223	1.9093	3.685	2.2873	4.2894	4.4197	4.4197
29.7	0.903	1.0646	3.7735	1.7393	0.7747	3.0118	3.7392	1.491	1.091	6.5158	0.8179	0.9812	0.7053	3.5381	1.5348	2.6403	2.7079	2.1457	1.0377	0.987835	1.721	2.8122	4.2635	1.8198	1.9054	3.6893	2.2766	4.2871	4.4201	4.4201
29.8	0.9032	1.0632	3.7869	1.7365	0.7788	2.9993	3.736	1.4786	1.0919	6.3711	0.8164	0.9753	0.7077	3.5204	1.5372	2.6356	2.7073	2.1406	1.0417	0.98751	1.7257	2.8027	4.2643	1.8209	1.9054	3.6949	2.2664	4.2841	4.4182	4.4182
29.9	0.9025	1.064	3.814	1.7345	0.778	2.9942	3.7212	1.4713	1.091	6.2797	0.8124	0.9829	0.7092	3.5292	1.5393	2.6299	2.7043	2.1423	1.0411	0.996269	1.7273	2.7936	4.262	1.8203	1.9022	3.7005	2.2575	4.2894	4.4189	4.4189
30	0.9029	1.0721	3.829	1.7341	0.7789	2.9862	3.7133	1.4407	1.0906	5.9836	0.8397	0.9818	0.7064	3.5307	1.5311	2.6301	2.7023	2.1354	1.0435	1	1.7334	2.7916	4.2605	1.8188	1.9007	3.7049	2.2478	4.295	4.4236	4.4236
30.1	0.8518	1.8185	4.2568	1.7334	0.8518	2.5529	4.2988	1.8185	1.0813	4.2568	0.8998	0.960584	0.7183	4.4346	1.9001	2.1849	2.7849	2.2397	1.9001	1.0813	0.8518	2.7849	4.2568	1.8185	1.9001	3.7074	2.2397	4.2988	4.4346	4.4346
30.2	0.8519	1.8178	4.2546	1.731	0.8519	2.5539	4.3097	1.8178	1.0808	4.2546	0.8976	0.96253	0.718	4.4527	1.8978	2.1809	2.7802	2.2319	1.8978	1.0808	0.8519	2.7802	4.2546	1.8178	1.8978	3.708	2.2319	4.3097	4.4527	4.4527
30.3	0.8512	1.8163	4.2527	1.7317	0.8512	2.56	4.3158	1.8163	1.0817	4.2527	0.8992	0.960908	0.72	4.4777	1.8961	2.1723	2.7699	2.2246	1.8961	1.0817	0.8512	2.7699	4.2527	1.8163	1.8961	3.7068	2.2246	4.3158	4.4777	4.4777
30.4	0.8547	1.8145	4.2475	1.727	0.8547	2.5617	4.3279	1.8145	1.0825	4.2475	0.8981	0.959124	0.7212	4.5032	1.895	2.1704	2.7616	2.2178	1.895	1.0825	0.8547	2.7616	4.2475	1.8145	1.895	3.7021	2.2178	4.3279	4.5032	4.5032
30.5	0.8544	1.8138	4.2442	1.7205	0.8544	2.5625	4.3394	1.8138	1.0832	4.2442	0.8959	0.960746	0.72	4.5282	1.8933	2.1661	2.757	2.2091	1.8933	1.0832	0.8544	2.757	4.2442	1.8138	1.8933	3.6965	2.2091	4.3394	4.5282	4.5282
30.6	0.8558	1.8132	4.2405	1.7242	0.8558	2.5676	4.3405	1.8132	1.0836	4.2405	0.8968	0.957664	0.7204	4.5553	1.8921	2.1578	2.7525	2.2002	1.8921	1.0836	0.8558	2.7525	4.2405	1.8132	1.8921	3.6902	2.2002	4.3405	4.5553	4.5553
30.7	0.8554	1.8119	4.2394	1.721	0.8554	2.5717	4.3528	1.8119	1.085	4.2394	0.8949	0.959286	0.722	4.5794	1.8877	2.1524	2.7457	2.1924	1.8877	1.085	0.8554	2.7457	4.2394	1.8119	1.8877	3.684	2.1924	4.3528	4.5794	4.5794
30.8	0.8564	1.8107	4.2379	1.7236	0.8564	2.5697	4.3562	1.8107	1.0849	4.2379	0.8942	0.956529	0.7217	4.5979	1.8869	2.1488	2.7404	2.1908	1.8869	1.0849	0.8564	2.7404	4.2379	1.8107	1.8869	3.6788	2.1908	4.3562	4.5979	4.5979
30.9	0.8587	1.8106	4.2382	1.7228	0.8587	2.5759	4.3627	1.8106	1.0852	4.2382	0.8994	0.957178	0.7209	4.6124	1.8863	2.1435	2.734	2.1873	1.8863	1.0852	0.8587	2.734	4.2382	1.8106	1.8863	3.6784	2.1873	4.3627	4.6124	4.6124
31	0.8575	1.8088	4.2357	1.7169	0.8575	2.5779	4.3643	1.8088	1.0842	4.2357	0.9001	0.957664	0.7209	4.6227	1.8842	2.1368	2.7289	2.1817	1.8842	1.0842	0.8575	2.7289	4.2357	1.8088	1.8842	3.6884	2.1817	4.3643	4.6227	4.6227
31.1	0.8587	1.8023	4.2353	1.7124	0.8587	2.5804	4.3658	1.8023	1.085	4.2353	0.9002	0.960908	0.7212	4.6302	1.8843	2.1346	2.7241	2.1755	1.8843	1.085	0.8587	2.7241	4.2353	1.8023	1.8843	3.7152	2.1755	4.3658	4.6302	4.6302
31.2	0.8566	1.8082	4.2323	1.7101	0.8566	2.5854	4.3681	1.8082	1.0852	4.2323	0.9036	0.958637	0.7196	4.6335	1.8825	2.1257	2.7228	2.1692	1.8825	1.0852	0.8566	2.7228	4.2323	1.8082	1.8825	3.7629	2.1692	4.3681	4.6335	4.6335
31.3	0.8548	1.8085	4.2334	1.7155	0.8548	2.5866	4.3662	1.8085	1.0857	4.2334	0.9015	0.960746	0.7204	4.6314	1.8799	2.1286	2.718	2.1623	1.8799	1.0857	0.8548	2.718	4.2334	1.8085	1.8799	3.8329	2.1623	4.3662	4.6314	4.6314
31.4	0.8569	1.8079	4.2338	1.7174	0.8569	2.587	4.3627	1.8079	1.0851	4.2338	0.9045	0.957664	0.7212	4.6302	1.8787	2.1221	2.7165	2.1557	1.8787	1.0851	0.8569	2.7165	4.2338	1.8079	1.8787	3.9205	2.1557	4.3627	4.6302	4.6302
31.5	0.8578	1.8066	4.2242	1.7146	0.8578	2.5922	4.365	1.8066	1.0836	4.2242	0.9077	0.959773	0.7216	4.6211	1.8761	2.1198	2.7134	2.1502	1.8761	1.0836	0.8578	2.7134	4.2242	1.8066	1.8761	4.0161	2.1502	4.365	4.6211	4.6211
31.6	0.8548	1.8063	4.2213	1.7162	0.8548	2.5902	4.3562	1.8063	1.0848	4.2213	0.9086	0.958475	0.7227	4.619	1.8714	2.1221	2.7127	2.1445	1.8714	1.0848	0.8548	2.7127	4.2213	1.8063	1.8714	4.1137	2.1445	4.3562	4.619	4.619
31.7	0.8532	1.8044	4.2198	1.7156	0.8532	2.5906	4.3558	1.8044	1.0842	4.2198	0.9114	0.959286	0.7219	4.6128	1.8608	2.1247	2.7106	2.1389	1.8608	1.0842	0.8532	2.7106	4.2198	1.8044	1.8608	4.2018	2.1389	4.3558	4.6128	4.6128
31.8	0.8522	1.8032	4.2168	1.721	0.8522	2.5899	4.3493	1.8032	1.083	4.2168	0.913	0.962368	0.7221	4.5987	1.8648	2.122	2.7082	2.1341	1.8648	1.083	0.8522	2.7082	4.2168	1.8032	1.8648	4.2744	2.1341	4.3493	4.5987	4.5987
31.9	0.853	1.802	4.2157	1.7257	0.853	2.5889	4.3566	1.802	1.0822	4.2157	0.912	0.959448	0.7231	4.5893	1.8636	2.1284	2.7023	2.1307	1.8636	1.0822	0.853	2.7023	4.2157	1.802	1.8636	4.3344	2.1307	4.3566	4.5893	4.5893
32	0.8534	1.8018	4.2132	1.7273	0.8534	2.5885	4.3497	1.8018	1.0825	4.2132	0.9128	0.959611	0.72	4.5757	1.8587	2.1329	2.7008	2.1291	1.8587	1.0825	0.8534	2.7008	4.2132	1.8018	1.8587	4.3839	2.1291	4.3497	4.5757	4.5757
32.1	0.8528	1.8003	4.2113	1.7334	0.8528	2.5843	4.3413	1.8003	1.0827	4.2113	0.9151	0.961719	0.7231	4.5635	1.8568	2.1402	2.698	2.1291	1.8568	1.0827	0.8528	2.698	4.2113	1.8003	1.8568	4.4197	2.1291	4.3413	4.5635	4.5635
32.2	0.8502	1.7993	4.2073	1.799	0.8502	2.5897	4.339	1.7993	1.0811	4.2073	0.9161	0.966586	0.7208	4.5533	1.8556	2.1447	2.6958	2.1305	1.8556	1.0811	0.8502	2.6958	4.2073	1.7993	1.8556	4.435	2.1305	4.339	4.5533	4.5533
32.3	0.8502	1.7974	4.2051	1.7956	0.8502	2.5829	4.3378	1.7974	1.0823	4.2051	0.9161	0.966261	0.7204	4.5427	1.8556	2.1457	2.6958	2.1324	1.8556	1.0823	0.8502	2.6958	4.2051	1.7974	1.8556	4.4425	2.1324	4.3378	4.5427	4.5427
32.4	0.8474	1.7974	4.2033	1.7939	0.8474	2.5858	4.3447	1.7974	1.0827	4.2033	0.9139	0.966748	0.7222	4.5342	1.8517	2.1483	2.6951	2.1354	1.8517	1.0827	0.8474	2.6951	4.2033	1.7974	1.8517	4.4433	2.1354	4.3447	4.5342	4.5342
32.5	0.8495	1.7961	4.2007	1.7928	0.8495	2.5841	4.3325	1.7961	1.0827	4.2007	0.9151	0.968532	0.7205	4.5314	1.8488	2.1476	2.691	2.1389	1.8488	1.0827	0.8495	2.691	4.2007	1.7961	1.8488	4.4354	2.1389	4.3325	4.5314	4.5314
32.6	0.8449	1.7962	4.1992	1.7915	0.8449	2.5893	4.3226	1.7962	1.0803	4.1992	0.919	0.967883	0.7218	4.5342	1.8457	2.1502	2.6897	2.143	1.8457	1.0803	0.8449	2.6897	4.1992	1.7962	1.8457	4.417	2.143	4.3226	4.5342	4.5342
32.7	0.8444	1.7939	4.1978	1.7898	0.8444	2.5875	4.3181	1.7939	1.0808	4.1978	0.9194	0.968856	0.7245	4.5423	1.8415	2.1507	2.6906	2.1464	1.8415	1.0808	0.8444	2.6906	4.1978	1.7939	1.8415	4.3917	2.1464	4.3181	4.5423	4.5423
32.8	0.8459	1.7947	4.1948	1.7882	0.8459	2.5929	4.3165	1.7947	1.0792	4.1948	0.919	0.969667	0.7226	4.5582	1.8378	2.1536	2.6882	2.1486	1.8378	1.0792	0.8459	2.6882	4.1948	1.7947	1.8378	4.3528	2.1486	4.3165	4.5582	4.5582
32.9	0.8468	1.7937	4.1948	1.7861	0.8468	2.6003	4.3139	1.7937	1.0798	4.1948	0.9145	0.970965	0.7212	4.5843	1.8339	2.1581	2.6843	2.1502	1.8339	1.0798	0.8468	2.6843	4.1948	1.7937	1.8339	4.3146	2.1502	4.3139	4.5843	4.5843
33	0.8473	1.7946	4.1908	1.784	0.8473	2.6066	4.3112	1.7946	1.079	4.1908	0.9129	0.972587	0.7232	4.6173	1.8274	2.1545	2.6848	2.1514	1.8274	1.079	0.8473	2.6848	4.1908	1.7946	1.8274	4.2796	2.1514	4.3112	4.6173	4.6173
33.1	0.8475	1.7939	4.1879	1.7825	0.8475	2.6131	4.3086	1.7939	1.0776	4.1879	0.911	0.974047	0.7259	4.659	1.8263	2.1561	2.6815	2.1519	1.8263	1.0776	0.8475	2.6815	4.1879	1.7939	1.8263	4.2379	2.1519	4.3086	4.659	4.659
33.2	0.8591	1.7926	4.1854	1.7805	0.8591	2.62	4.3067	1.7926	1.0749	4.1854	0.913	0.971776	0.7237	4.7075	1.826	2.153	2.68	2.1526	1.826	1.0749	0.8591	2.68	4.1854	1.7926	1.826	4.1956	2.1526	4.3067	4.7075	4.7075
33.3	0.8933	1.7921	4.1832	1.7803	0.8933	2.6236	4.3082	1.7921	1.0748	4.1832	0.9139	0.975831	0.7253	4.7559	1.8255	2.1492	2.6764	2.1526	1.8255	1.0748	0.8933	2.6764	4.1832	1.7921	1.8255	4.1535	2.1526	4.3082	4.7559	4.7559
33.4	0.91	1.7911	4.1814	1.7759	0.91	2.6316	4.3007	1.7911	1.0746	4.1814	0.9139	0.975182	0.7212	4.7984	1.8231	2.1507	2.6757	2.1516	1.8231	1.0746	0.91	2.6757	4.1814	1.7911	1.8231	4.1162	2.1516	4.3007	4.7984	4.7984
33.5	0.8963	1.7905	4.1788	1.7759	0.8963	2.6377	4.3018	1.7905	1.0748	4.1788	0.9126	0.975182	0.7208	4.8348	1.8234	2.1528	2.6716	2.1499	1.8234	1.0748	0.8963	2.6716	4.1788	1.7905	1.8234	4.0818	2.1499	4.3018	4.8348	4.8348
33.6	0.8871	1.7907	4.177	1.774	0.8871	2.6369	4.2973	1.7907	1.0744	4.177	0.9114	0.97502	0.7217	4.8635	1.8197	2.1473	2.6699	2.1469	1.8197	1.0744	0.8871	2.6699	4.177	1.7907	1.8197	4.0509	2.1469	4.2973	4.8635	4.8635
33.7	0.9063	1.7896	4.1766	1.7725	0.9063	2.6462	4.2973	1.7896	1.0725	4.1766	0.9121	0.976318	0.7244	4.8867	1.8172	2.1442	2.6738	2.1435	1.8172	1.0725	0.9063	2.6738	4.1766	1.7896	1.8172	4.0244	2.1435	4.2973	4.8867	4.8867
33.8	0.9176	1.7895	4.1744	1.7712	0.9176	2.6475	4.2954	1.7895	1.0746	4.1744	0.9132	0.974047	0.7232	4.9042	1.8138	2.1456	2.6725	2.1399	1.8138	1.0746	0.9176	2.6725	4.1744	1.7895	1.8138	4.0013	2.1399	4.2954	4.9042	4.9042
33.9	0.92	1.7875	4.1723	1.7689	0.92	2.6484	4.2991	1.7875	1.0729	4.1723	0.9148	0.972425	0.7275	4.9163	1.8151	2.148	2.6731	2.136	1.8151	1.0729	0.92	2.6731	4.1723	1.7875	1.8151	3.979	2.136	4.2991	4.9163	4.9163
34	0.9226	1.7873	4.1683	1.7617	0.9226	2.6486	4.2935	1.7873	1.0756	4.1683	0.9132	0.972587	0.7239	4.9249	1.8129	2.1444	2.6723	2.1322	1.8129	1.0756	0.9226	2.6723	4.1683	1.7873	1.8129	3.9596	2.1322	4.2935	4.9249	4.9249
34.1	0.9273	1.7867	4.1672	1.7623	0.9273	2.6479	4.2935	1.7867	1.075	4.1672	0.9127	0.972101	0.7236	4.9276	1.8126	2.1416	2.6721	2.1286	1.8126	1.075	0.9273	2.6721	4.1672	1.7867	1.8126	3.9457	2.1286	4.2935	4.9276	4.9276
34.2	0.9263	1.7866	4.165	1.7645	0.9263	2.6488	4.2897	1.7866	1.0749	4.165	0.9137	0.970803	0.7249	4.9271	1.8114	2.1354	2.6701	2.1245	1.8114	1.0749	0.9263	2.6701	4.165	1.7866	1.8114	3.9373	2.1245	4.2897	4.9271	4.9271
34.3	0.9283	1.786	4.1657	1.7635	0.9283	2.6435	4.2909	1.786	1.0757	4.1657	0.9093	0.97129	0.7239	4.9235	1.8113	2.1363	2.6706	2.1199	1.8113	1.0757	0.9283	2.6706	4.1657	1.786	1.8113	3.9363	2.1199	4.2909	4.9235	4.9235
34.4	0.9286	1.786	4.1636	1.7607	0.9286	2.6445	4.289	1.786	1.0776	4.1636	0.9115	0.974047	0.7227	4.9186	1.8106	2.1336	2.6701	2.1147	1.8106	1.0776	0.9286	2.6701	4.1636	1.786	1.8106	3.9423	2.1147	4.289	4.9186	4.9186
34.5	0.9291	1.7863	4.1636	1.7605	0.9291	2.6409	4.2894	1.7863	1.0805	4.1636	0.9118	0.971127	0.7196	4.9141	1.8097	2.1322	2.6695	2.1099	1.8097	1.0805	0.9291	2.6695	4.1636	1.7863	1.8097	3.9538	2.1099	4.2894	4.9141	4.9141
34.6	0.9288	1.7869	4.1592	1.7597	0.9288	2.6422	4.2894	1.7869	1.082	4.1592	0.9122	0.969667	0.7251	4.9055	1.8069	2.1317	2.6676	2.1055	1.8069	1.082	0.9288	2.6676	4.1592	1.7869	1.8069	3.9657	2.1055	4.2894	4.9055	4.9055
34.7	0.93	1.7859	4.1592	1.7582	0.93	2.6348	4.2897	1.7859	1.0825	4.1592	0.9075	0.972101	0.7267	4.8912	1.8047	2.1317	2.6676	2.1012	1.8047	1.0825	0.93	2.6676	4.1592	1.7859	1.8047	3.9759	2.1012	4.2897	4.8912	4.8912
34.8	0.9355	1.7857	4.1553	1.7582	0.9355	2.6333	4.2931	1.7857	1.0846	4.1553	0.9075	0.969343	0.7279	4.8782	1.8028	2.1308	2.6678	2.0978	1.8028	1.0846	0.9355	2.6678	4.1553	1.7857	1.8028	3.9848	2.0978	4.2931	4.8782	4.8782
34.9	0.9371	1.784	4.1527	1.7553	0.9371	2.6322	4.2958	1.784	1.0881	4.1527	0.9074	0.967072	0.7284	4.8635	1.8015	2.1274	2.6654	2.098	1.8015	1.0881	0.9371	2.6654	4.1527	1.784	1.8015	3.991	2.098	4.2958	4.8635	4.8635
35	0.9396	1.783	4.1499	1.7543	0.9396	2.6295	4.2995	1.783	1.0858	4.1499	0.9069	0.967559	0.7283	4.844	1.799	2.1278	2.6648	2.0959	1.799	1.0858	0.9396	2.6648	4.1499	1.783	1.799	3.9937	2.0959	4.2995	4.844	4.844
35.1	0.9392	1.7831	4.1481	1.752	0.9392	2.6282	4.3037	1.7831	1.088	4.1481	0.9059	0.969992	0.7262	4.8251	1.7956	2.1244	2.6637	2.0923	1.7956	1.088	0.9392	2.6637	4.1481	1.7831	1.7956	3.9934	2.0923	4.3037	4.8251	4.8251
35.2	0.9426	1.7824	4.1463	1.7504	0.9426	2.6223	4.3093	1.7824	1.088	4.1463	0.9024	0.965775	0.73	4.8089	1.7939	2.1232	2.6601	2.0884	1.7939	1.088	0.9426	2.6601	4.1463	1.7824	1.7939	3.9903	2.0884	4.3093	4.8089	4.8089
35.3	0.9447	1.7819	4.1455	1.7493	0.9447	2.6257	4.3203	1.7819	1.0888	4.1455	0.9029	0.964152	0.7539	4.784	1.7928	2.1184	2.6614	2.0842	1.7928	1.0888	0.9447	2.6614	4.1455	1.7819	1.7928	3.9831	2.0842	4.3203	4.784	4.784
35.4	0.9454	1.7822	4.1437	1.7474	0.9454	2.6249	4.3317	1.7822	1.089	4.1437	0.9006	0.961719	0.7539	4.7637	1.7915	2.1206	2.6609	2.0809	1.7915	1.089	0.9454	2.6609	4.1437	1.7822	1.7915	3.9725	2.0809	4.3317	4.7637	4.7637
35.5	0.9472	1.7799	4.1437	1.7443	0.9472	2.6207	4.3443	1.7799	1.087	4.1437	0.9031	0.96399	0.7612	4.746	1.7898	2.1167	2.6629	2.0799	1.7898	1.087	0.9472	2.6629	4.1437	1.7799	1.7898	3.961	2.0799	4.3443	4.746	4.746
35.6	0.9454	1.7814	4.1419	1.7449	0.9454	2.6215	4.3528	1.7814	1.0918	4.1419	0.9049	0.962855	0.8348	4.7276	1.7882	2.1142	2.6631	2.0764	1.7882	1.0918	0.9454	2.6631	4.1419	1.7814	1.7882	3.9481	2.0764	4.3528	4.7276	4.7276
35.7	0.9432	1.7803	4.1394	1.7439	0.9432	2.62	4.3658	1.7803	1.0911	4.1394	0.9038	0.964315	0.8406	4.7075	1.7861	2.1147	2.6614	2.0719	1.7861	1.0911	0.9432	2.6614	4.1394	1.7803	1.7861	3.9346	2.0719	4.3658	4.7075	4.7075
35.8	0.9489	1.7818	4.1358	1.7433	0.9489	2.6165	4.3793	1.7818	1.0907	4.1358	0.9057	0.963179	0.8477	4.6893	1.784	2.1152	2.6629	2.0674	1.784	1.0907	0.9489	2.6629	4.1358	1.7818	1.784	3.9211	2.0674	4.3793	4.6893	4.6893
35.9	0.9554	1.7811	4.1333	1.7403	0.9554	2.6175	4.3878	1.7811	1.093	4.1333	0.9048	0.962206	0.819	4.675	1.7825	2.1084	2.6603	2.0628	1.7825	1.093	0.9554	2.6603	4.1333	1.7811	1.7825	3.9084	2.0628	4.3878	4.675	4.675
36	0.9605	1.7793	4.1315	1.7393	0.9605	2.6125	4.3956	1.7793	1.0946	4.1315	0.9032	0.964315	0.7607	4.6598	1.7805	2.1069	2.6588	2.0583	1.7805	1.0946	0.9605	2.6588	4.1315	1.7793	1.7805	3.8951	2.0583	4.3956	4.6598	4.6598
36.1	0.9594	1.7799	4.1287	1.7378	0.9594	2.6165	4.4022	1.7799	1.0958	4.1287	0.9062	0.965288	0.7429	4.6456	1.7803	2.105	2.6622	2.0535	1.7803	1.0958	0.9594	2.6622	4.1287	1.7799	1.7803	3.8828	2.0535	4.4022	4.6456	4.6456
36.2	0.963	1.7728	4.1283	1.7358	0.963	2.6154	4.4096	1.7728	1.0967	4.1283	0.9028	0.969992	0.7656	4.6327	1.7759	2.1042	2.6641	2.0489	1.7759	1.0967	0.963	2.6641	4.1283	1.7728	1.7759	3.8726	2.0489	4.4096	4.6327	4.6327
36.3	0.9746	1.776	4.1265	1.7351	0.9746	2.6118	4.4143	1.776	1.0965	4.1265	0.9017	0.967559	0.7796	4.6206	1.7759	2.1071	2.6684	2.0455	1.7759	1.0965	0.9746	2.6684	4.1265	1.776	1.7759	3.8646	2.0455	4.4143	4.6206	4.6206
36.4	0.981	1.7799	4.1272	1.7341	0.981	2.6116	4.4193	1.7799	1.0944	4.1272	0.9041	0.968856	0.7929	4.6107	1.774	2.1099	2.6757	2.0428	1.774	1.0944	0.981	2.6757	4.1272	1.7799	1.774	3.8577	2.0428	4.4193	4.6107	4.6107
36.5	0.9747	1.7793	4.1305	1.7307	0.9747	2.6133	4.4264	1.7793	1.0955	4.1305	0.9028	0.96983	0.7995	4.6029	1.7725	2.117	2.6889	2.0382	1.7725	1.0955	0.9747	2.6889	4.1305	1.7793	1.7725	3.8518	2.0382	4.4264	4.6029	4.6029
36.6	0.9837	1.7789	4.1262	1.73	0.9837	2.6129	4.4189	1.7789	1.0977	4.1262	0.9021	0.970154	0.7955	4.5954	1.7712	2.125	2.704	2.0332	1.7712	1.0977	0.9837	2.704	4.1262	1.7789	1.7712	3.845	2.0332	4.4189	4.5954	4.5954
36.7	1.0047	1.7773	4.1201	1.7747	1.0047	2.6114	4.4162	1.7773	1.096	4.1201	0.9014	0.972425	0.8103	4.5872	1.7689	2.1404	2.7243	2.0267	1.7689	1.096	1.0047	2.7243	4.1201	1.7773	1.7689	3.8365	2.0267	4.4162	4.5872	4.5872
36.8	1.0051	1.7773	4.1169	1.7757	1.0051	2.6127	4.4174	1.7773	1.0932	4.1169	0.9032	0.974371	0.8164	4.5798	1.7617	2.1555	2.7477	2.0174	1.7617	1.0932	1.0051	2.7477	4.1169	1.7773	1.7617	3.828	2.0174	4.4174	4.5798	4.5798
36.9	1.0098	1.7763	4.1158	1.7751	1.0098	2.6123	4.4217	1.7763	1.0925	4.1158	0.9013	0.975182	0.8184	4.5733	1.7623	2.1755	2.773	2.0109	1.7623	1.0925	1.0098	2.773	4.1158	1.7763	1.7623	3.8212	2.0109	4.4217	4.5733	4.5733
37	1.0092	1.7754	4.1151	1.7757	1.0092	2.6133	4.417	1.7754	1.0918	4.1151	0.9016	0.97794	0.8042	4.568	1.7645	2.1828	2.7995	2.0069	1.7645	1.0918	1.0092	2.7995	4.1151	1.7754	1.7645	3.815	2.0069	4.417	4.568	4.568
37.1	1.0096	1.7747	4.1126	1.7748	1.0096	2.6098	4.4166	1.7747	1.0929	4.1126	0.9012	0.978264	0.8107	4.5627	1.7635	2.2021	2.821	2.0033	1.7635	1.0929	1.0096	2.821	4.1126	1.7747	1.7635	3.8098	2.0033	4.4166	4.5627	4.5627
37.2	1.01	1.7757	4.1119	1.775	1.01	2.6129	4.4057	1.7757	1.0891	4.1119	0.9035	0.979075	0.832	4.5578	1.7607	2.2077	2.8402	1.9995	1.7607	1.0891	1.01	2.8402	4.1119	1.7757	1.7607	3.8053	1.9995	4.4057	4.5578	4.5578
37.3	1.0151	1.7751	4.1101	1.7746	1.0151	2.6098	4.3995	1.7751	1.0902	4.1101	0.9029	0.977778	0.8355	4.5537	1.7605	2.2196	2.8554	1.995	1.7605	1.0902	1.0151	2.8554	4.1101	1.7751	1.7605	3.8008	1.995	4.3995	4.5537	4.5537
37.4	1.0239	1.7757	4.108	1.7685	1.0239	2.6074	4.3967	1.7757	1.0851	4.108	0.9003	0.979075	0.8237	4.5509	1.7597	2.2242	2.8621	1.9905	1.7597	1.0851	1.0239	2.8621	4.108	1.7757	1.7597	3.7956	1.9905	4.3967	4.5509	4.5509
37.5	1.0351	1.7748	4.1065	1.7743	1.0351	2.6051	4.4049	1.7748	1.0894	4.1065	0.8988	0.982644	0.8223	4.5456	1.7582	2.2312	2.8702	1.9862	1.7582	1.0894	1.0351	2.8702	4.1065	1.7748	1.7582	3.7898	1.9862	4.4049	4.5456	4.5456
37.6	1.0327	1.775	4.1055	1.7747	1.0327	2.6077	4.3967	1.775	1.0892	4.1055	0.9032	0.984753	0.8251	4.5431	1.7582	2.2315	2.8735	1.9824	1.7582	1.0892	1.0327	2.8735	4.1055	1.775	1.7582	3.7857	1.9824	4.3967	4.5431	4.5431
37.7	1.0376	1.7746	4.1023	1.7735	1.0376	2.6095	4.3816	1.7746	1.0893	4.1023	0.9029	0.984266	0.8153	4.5403	1.7553	2.233	2.8744	1.978	1.7553	1.0893	1.0376	2.8744	4.1023	1.7746	1.7553	3.7815	1.978	4.3816	4.5403	4.5403
37.8	1.0399	1.7685	4.098	1.7741	1.0399	2.6108	4.3839	1.7685	1.0888	4.098	0.9011	0.986861	0.76	4.5383	1.7543	2.2344	2.8691	1.9734	1.7543	1.0888	1.0399	2.8691	4.098	1.7685	1.7543	3.778	1.9734	4.3839	4.5383	4.5383
37.9	1.0365	1.7743	4.0977	1.7748	1.0365	2.6152	4.3758	1.7743	1.0867	4.0977	0.9003	0.986212	0.7459	4.5359	1.752	2.2335	2.8644	1.9698	1.752	1.0867	1.0365	2.8644	4.0977	1.7743	1.752	3.7744	1.9698	4.3758	4.5359	4.5359
38	1.0275	1.7747	4.0945	1.775	1.0275	2.6223	4.3816	1.7747	1.0866	4.0945	0.9012	0.987835	0.73	4.5338	1.7504	2.2297	2.8582	1.9641	1.7504	1.0866	1.0275	2.8582	4.0945	1.7747	1.7504	3.7722	1.9641	4.3816	4.5338	4.5338
38.1	1.0279	1.7735	4.0934	1.7763	1.0279	2.6232	4.3743	1.7735	1.091	4.0934	0.9015	0.984753	0.7033	4.5322	1.7493	2.2283	2.8531	1.9578	1.7493	1.091	1.0279	2.8531	4.0934	1.7735	1.7493	3.7703	1.9578	4.3743	4.5322	4.5322
38.2	1.0374	1.7741	4.0924	1.7763	1.0374	2.6236	4.3754	1.7741	1.0895	4.0924	0.9018	0.984428	0.703	4.5318	1.7474	2.2285	2.8457	1.953	1.7474	1.0895	1.0374	2.8457	4.0924	1.7741	1.7474	3.7658	1.953	4.3754	4.5318	4.5318
38.3	1.0461	1.7748	4.0892	1.7776	1.0461	2.6299	4.3704	1.7748	1.0926	4.0892	0.9032	0.987348	0.7042	4.5302	1.7443	2.2207	2.8372	1.9501	1.7443	1.0926	1.0461	2.8372	4.0892	1.7748	1.7443	3.761	1.9501	4.3704	4.5302	4.5302
38.4	1.0501	1.775	4.0902	1.778	1.0501	2.628	4.3685	1.775	1.0907	4.0902	0.9036	0.983779	0.6189	4.5302	1.7449	2.2139	2.8272	1.9482	1.7449	1.0907	1.0501	2.8272	4.0902	1.775	1.7449	3.7575	1.9482	4.3685	4.5302	4.5302
38.5	1.0529	1.7763	4.0913	1.7796	1.0529	2.6331	4.37	1.7763	1.091	4.0913	0.9016	0.983293	0.5795	4.5294	1.7439	2.2123	2.8149	1.9474	1.7439	1.091	1.0529	2.8149	4.0913	1.7763	1.7439	3.7544	1.9474	4.37	4.5294	4.5294
38.6	1.0569	1.7763	4.0821	1.7792	1.0569	2.6337	4.3712	1.7763	1.0923	4.0821	0.9039	0.98459	0.5164	4.5286	1.7433	2.2035	2.807	1.9485	1.7433	1.0923	1.0569	2.807	4.0821	1.7763	1.7433	3.7512	1.9485	4.3712	4.5286	4.5286
38.7	1.0665	1.7776	4.0793	1.7803	1.0665	2.6394	4.3627	1.7776	1.0904	4.0793	0.9029	0.98605	0.5356	4.5294	1.7403	2.2009	2.7961	1.9502	1.7403	1.0904	1.0665	2.7961	4.0793	1.7776	1.7403	3.7486	1.9502	4.3627	4.5294	4.5294
38.8	1.0726	1.778	4.0765	1.779	1.0726	2.6424	4.3639	1.778	1.0916	4.0765	0.9015	0.986861	0.607	4.5294	1.7393	2.1958	2.7907	1.9535	1.7393	1.0916	1.0726	2.7907	4.0765	1.778	1.7393	3.7455	1.9535	4.3639	4.5294	4.5294
38.9	1.0682	1.7796	4.0737	1.7809	1.0682	2.645	4.3616	1.7796	1.0911	4.0737	0.9002	0.985726	0.5844	4.5282	1.7378	2.1884	2.7835	1.9582	1.7378	1.0911	1.0682	2.7835	4.0737	1.7796	1.7378	3.742	1.9582	4.3616	4.5282	4.5282
39	1.0625	1.7792	4.0719	1.73	1.0625	2.6492	4.3612	1.7792	1.093	4.0719	0.9011	0.987997	0.5113	4.5274	1.7358	2.1842	2.7757	1.9635	1.7358	1.093	1.0625	2.7757	4.0719	1.7792	1.7358	3.7379	1.9635	4.3612	4.5274	4.5274
39.1	1.0634	1.7803	4.0712	1.7288	1.0634	2.646	4.357	1.7803	1.0914	4.0712	0.9017	0.98605	0.5094	4.5262	1.7351	2.176	2.7677	1.9685	1.7351	1.0914	1.0634	2.7677	4.0712	1.7803	1.7351	3.736	1.9685	4.357	4.5262	4.5262
39.2	1.0772	1.779	4.0687	1.7281	1.0772	2.6392	4.3543	1.779	1.0896	4.0687	0.9019	0.988808	0.6275	4.5245	1.7341	2.1696	2.7599	1.9752	1.7341	1.0896	1.0772	2.7599	4.0687	1.779	1.7341	3.7369	1.9752	4.3543	4.5245	4.5245
39.3	1.0766	1.7809	4.0698	1.7245	1.0766	2.6382	4.3566	1.7809	1.0918	4.0698	0.8979	0.988646	0.6857	4.5237	1.7307	2.1692	2.7536	1.9827	1.7307	1.0918	1.0766	2.7536	4.0698	1.7809	1.7307	3.7407	1.9827	4.3566	4.5237	4.5237
39.4	1.0736	1.7806	4.0666	1.7188	1.0736	2.6348	4.3551	1.7806	1.0897	4.0666	0.9027	0.993512	0.6997	4.5241	1.73	2.1668	2.7479	1.9913	1.73	1.0897	1.0736	2.7479	4.0666	1.7806	1.73	3.7474	1.9913	4.3551	4.5241	4.5241
39.5	1.0735	1.7812	4.0635	1.7191	1.0735	2.6358	4.3562	1.7812	1.0888	4.0635	0.9039	0.992539	0.676	4.5237	1.7288	2.1638	2.743	2.0004	1.7288	1.0888	1.0735	2.743	4.0635	1.7812	1.7288	3.7563	2.0004	4.3562	4.5237	4.5237
39.6	1.0705	1.7811	4.061	1.7205	1.0705	2.6405	4.357	1.7811	1.0894	4.061	0.9045	0.992214	0.6895	4.5258	1.7281	2.159	2.7384	2.0069	1.7281	1.0894	1.0705	2.7384	4.061	1.7811	1.7281	3.7658	2.0069	4.357	4.5258	4.5258
39.7	1.0646	1.7809	4.0565	1.7358	1.0646	2.6403	4.3482	1.7809	1.091	4.0565	0.903	0.989943	0.7053	4.5241	1.7245	2.1533	2.7336	2.013	1.7245	1.091	1.0646	2.7336	4.0565	1.7809	1.7245	3.7741	2.013	4.3482	4.5241	4.5241
39.8	1.0632	1.7777	4.0561	1.7351	1.0632	2.6356	4.3478	1.7777	1.0919	4.0561	0.9032	0.987835	0.7077	4.5233	1.7188	2.1457	2.7287	2.019	1.7188	1.0919	1.0632	2.7287	4.0561	1.7777	1.7188	3.7828	2.019	4.3478	4.5233	4.5233
39.9	1.064	1.7789	4.054	1.7341	1.064	2.6299	4.3436	1.7789	1.091	4.054	0.9025	0.98751	0.7092	4.5217	1.7191	2.1406	2.7237	2.0252	1.7191	1.091	1.064	2.7237	4.054	1.7789	1.7191	3.7898	2.0252	4.3436	4.5217	4.5217
40	1.0721	1.7786	4.054	1.7307	1.0721	2.6301	4.3482	1.7786	1.0906	4.054	0.9029	0.996269	0.7064	4.5197	1.7205	2.1423	2.7213	2.0315	1.7205	1.0906	1.0721	2.7213	4.054	1.7786	1.7205	3.794	2.0315	4.3482	4.5197	4.5197
