# Supplementary material for: The Monty Hall problem revisited: Autonomic arousal in an inverted version of the game
Source: PLoS One. 2018 Mar 26;13(3):e0192542. doi: 10.1371/journal.pone.0192542 (PMC5868764; doi:10.1371/journal.pone.0192542)
Supplement: S3 Table — (XLSX) [file pone.0192542.s003.xlsx]

## Sheet: Plan1
Table S3. Normalized means of skin conductance
os each participants in the classical
and inverted version of the MHG
				Time [s]	Classic	Inverted
				0	0.843107	0.86017
				0.1	0.842598	0.860267
				0.2	0.84418	0.861022
				0.3	0.844399	0.861441
				0.4	0.843788	0.862135
				0.5	0.844321	0.86332
				0.6	0.843837	0.862938
				0.7	0.843785	0.864084
				0.8	0.844074	0.864806
				0.9	0.844519	0.865281
				1	0.845448	0.865816
				1.1	0.845174	0.866211
				1.2	0.844861	0.866657
				1.3	0.845471	0.865838
				1.4	0.84521	0.866669
				1.5	0.844592	0.866531
				1.6	0.845249	0.867023
				1.7	0.846541	0.868258
				1.8	0.846874	0.868136
				1.9	0.848369	0.86805
				2	0.850071	0.868866
				2.1	0.85212	0.869005
				2.2	0.854145	0.870095
				2.3	0.856216	0.870578
				2.4	0.858915	0.871498
				2.5	0.861412	0.872358
				2.6	0.86386	0.874242
				2.7	0.866798	0.874469
				2.8	0.869823	0.875913
				2.9	0.871203	0.876851
				3	0.8735	0.878187
				3.1	0.874248	0.878325
				3.2	0.875175	0.879247
				3.3	0.876455	0.879833
				3.4	0.876408	0.880614
				3.5	0.877226	0.880387
				3.6	0.877933	0.880355
				3.7	0.878689	0.880915
				3.8	0.87771	0.881114
				3.9	0.877768	0.882333
				4	0.877412	0.881712
				4.1	0.876748	0.881843
				4.2	0.876283	0.881969
				4.3	0.876677	0.880746
				4.4	0.877294	0.881455
				4.5	0.877159	0.881675
				4.6	0.877156	0.881563
				4.7	0.877491	0.882005
				4.8	0.877839	0.881757
				4.9	0.878178	0.881661
				5	0.878929	0.882502
				5.1	0.879247	0.881867
				5.2	0.880812	0.882719
				5.3	0.880571	0.883711
				5.4	0.880377	0.883734
				5.5	0.881149	0.883729
				5.6	0.880374	0.884104
				5.7	0.880038	0.884573
				5.8	0.880138	0.885218
				5.9	0.880692	0.885142
				6	0.880936	0.88437
				6.1	0.881048	0.884832
				6.2	0.881489	0.884737
				6.3	0.881476	0.884727
				6.4	0.88212	0.884463
				6.5	0.882055	0.884543
				6.6	0.882222	0.884275
				6.7	0.881102	0.885914
				6.8	0.88151	0.885172
				6.9	0.88263	0.884943
				7	0.882927	0.884602
				7.1	0.882836	0.88447
				7.2	0.882129	0.884127
				7.3	0.882208	0.883731
				7.4	0.881824	0.884306
				7.5	0.882417	0.88441
				7.6	0.880987	0.884512
				7.7	0.881661	0.884033
				7.8	0.882286	0.884862
				7.9	0.882065	0.885265
				8	0.881875	0.886107
				8.1	0.88183	0.886699
				8.2	0.882192	0.88748
				8.3	0.881779	0.887955
				8.4	0.881318	0.888536
				8.5	0.881398	0.889433
				8.6	0.880738	0.889897
				8.7	0.881279	0.890914
				8.8	0.881382	0.891062
				8.9	0.882212	0.891786
				9	0.880869	0.891753
				9.1	0.88159	0.891442
				9.2	0.881211	0.891599
				9.3	0.880945	0.891648
				9.4	0.880263	0.891503
				9.5	0.88005	0.89175
				9.6	0.880571	0.891837
				9.7	0.879179	0.891724
				9.8	0.879816	0.890952
				9.9	0.880241	0.891171
				10	0.879925	0.890498
				10.1	0.880189	0.890179
				10.2	0.879788	0.890629
				10.3	0.880692	0.890669
				10.4	0.881553	0.890745
				10.5	0.881383	0.890011
				10.6	0.881647	0.890035
				10.7	0.882375	0.890569
				10.8	0.882603	0.890754
				10.9	0.883503	0.891065
				11	0.88421	0.891619
				11.1	0.884894	0.89251
				11.2	0.884628	0.892673
				11.3	0.885332	0.892991
				11.4	0.886785	0.89371
				11.5	0.886344	0.89424
				11.6	0.88624	0.894942
				11.7	0.88668	0.895396
				11.8	0.887057	0.896085
				11.9	0.886713	0.896507
				12	0.887098	0.897229
				12.1	0.887386	0.897251
				12.2	0.888165	0.898492
				12.3	0.887706	0.898994
				12.4	0.887703	0.900056
				12.5	0.887816	0.900795
				12.6	0.887549	0.900461
				12.7	0.888061	0.900909
				12.8	0.888513	0.901127
				12.9	0.88908	0.901283
				13	0.888381	0.901807
				13.1	0.888509	0.901168
				13.2	0.889042	0.901077
				13.3	0.888728	0.901514
				13.4	0.889251	0.901545
				13.5	0.890358	0.90155
				13.6	0.890769	0.901662
				13.7	0.892239	0.901505
				13.8	0.8931	0.901334
				13.9	0.89369	0.900817
				14	0.894541	0.900653
				14.1	0.895588	0.900026
				14.2	0.896033	0.900669
				14.3	0.896238	0.900166
				14.4	0.896812	0.900621
				14.5	0.897718	0.901707
				14.6	0.898144	0.902396
				14.7	0.898933	0.901342
				14.8	0.899593	0.90274
				14.9	0.899822	0.903271
				15	0.900814	0.904441
				15.1	0.900748	0.905038
				15.2	0.902136	0.905652
				15.3	0.902139	0.90638
				15.4	0.902456	0.906706
				15.5	0.903808	0.907365
				15.6	0.904192	0.908599
				15.7	0.904369	0.909085
				15.8	0.905487	0.910373
				15.9	0.905582	0.910531
				16	0.906319	0.911211
				16.1	0.906593	0.911657
				16.2	0.906128	0.912376
				16.3	0.906146	0.91254
				16.4	0.906639	0.911902
				16.5	0.905698	0.913063
				16.6	0.905906	0.913661
				16.7	0.905937	0.913208
				16.8	0.906567	0.913805
				16.9	0.906143	0.914482
				17	0.906098	0.914716
				17.1	0.90657	0.915288
				17.2	0.906666	0.916013
				17.3	0.906243	0.916285
				17.4	0.907597	0.916774
				17.5	0.90728	0.916539
				17.6	0.90767	0.9176
				17.7	0.907937	0.918206
				17.8	0.907926	0.918234
				17.9	0.908434	0.918271
				18	0.909313	0.918644
				18.1	0.909133	0.91968
				18.2	0.909577	0.919749
				18.3	0.909534	0.920171
				18.4	0.908831	0.920536
				18.5	0.90892	0.92008
				18.6	0.908919	0.921092
				18.7	0.908007	0.921306
				18.8	0.907603	0.921283
				18.9	0.90518	0.921747
				19	0.903287	0.922172
				19.1	0.90413	0.922715
				19.2	0.904486	0.92232
				19.3	0.907934	0.922916
				19.4	0.91181	0.922728
				19.5	0.91153	0.922131
				19.6	0.910668	0.922256
				19.7	0.911443	0.921875
				19.8	0.91134	0.922656
				19.9	0.910458	0.922563
				20	0.91075	0.922668
				20.1	0.911087	0.922072
				20.2	0.911224	0.922052
				20.3	0.911997	0.921376
				20.4	0.912717	0.92163
				20.5	0.912985	0.922763
				20.6	0.912557	0.923008
				20.7	0.914287	0.923028
				20.8	0.915517	0.922659
				20.9	0.91573	0.923014
				21	0.916361	0.922469
				21.1	0.917672	0.922076
				21.2	0.919001	0.922584
				21.3	0.919055	0.921247
				21.4	0.91941	0.919887
				21.5	0.921433	0.919154
				21.6	0.92563	0.918974
				21.7	0.924032	0.919227
				21.8	0.920449	0.918472
				21.9	0.918051	0.918768
				22	0.918969	0.918687
				22.1	0.920216	0.919239
				22.2	0.924986	0.918939
				22.3	0.922185	0.918935
				22.4	0.920937	0.919481
				22.5	0.922387	0.92039
				22.6	0.92646	0.919486
				22.7	0.925045	0.920468
				22.8	0.923288	0.921619
				22.9	0.923949	0.920852
				23	0.928614	0.920053
				23.1	0.928754	0.921275
				23.2	0.932276	0.920902
				23.3	0.938792	0.921297
				23.4	0.937838	0.921545
				23.5	0.936693	0.921672
				23.6	0.935325	0.920397
				23.7	0.933346	0.919123
				23.8	0.931444	0.918433
				23.9	0.930807	0.920439
				24	0.930719	0.91796
				24.1	0.932441	0.915816
				24.2	0.933107	0.905811
				24.3	0.933182	0.911978
				24.4	0.932825	0.909593
				24.5	0.932055	0.909495
				24.6	0.933238	0.910447
				24.7	0.934277	0.910722
				24.8	0.935208	0.91146
				24.9	0.935321	0.91271
				25	0.935657	0.911509
				25.1	0.937448	0.909578
				25.2	0.938986	0.909848
				25.3	0.939727	0.91083
				25.4	0.94103	0.913154
				25.5	0.942831	0.914143
				25.6	0.94467	0.915287
				25.7	0.946441	0.9169
				25.8	0.947035	0.918465
				25.9	0.948005	0.921262
				26	0.949322	0.918476
				26.1	0.949737	0.917381
				26.2	0.948849	0.918909
				26.3	0.941884	0.922861
				26.4	0.933281	0.924316
				26.5	0.926616	0.924631
				26.6	0.925735	0.924252
				26.7	0.923017	0.928617
				26.8	0.920788	0.929427
				26.9	0.913568	0.927448
				27	0.899275	0.925532
				27.1	0.89826	0.928312
				27.2	0.905503	0.929597
				27.3	0.909819	0.928182
				27.4	0.910314	0.929103
				27.5	0.906754	0.931094
				27.6	0.904432	0.93304
				27.7	0.901452	0.933172
				27.8	0.900835	0.932729
				27.9	0.900731	0.9316
				28	0.896782	0.930094
				28.1	0.899434	0.929771
				28.2	0.901246	0.929173
				28.3	0.892966	0.929216
				28.4	0.865225	0.92707
				28.5	0.861385	0.925508
				28.6	0.861116	0.926049
				28.7	0.8564	0.926297
				28.8	0.85034	0.927591
				28.9	0.850137	0.926704
				29	0.850792	0.923773
				29.1	0.851634	0.923028
				29.2	0.852755	0.927816
				29.3	0.848281	0.930329
				29.4	0.849977	0.932205
				29.5	0.856923	0.926442
				29.6	0.863554	0.925305
				29.7	0.865059	0.925777
				29.8	0.84035	0.924856
				29.9	0.842375	0.923769
				30	0.841472	0.923689
				30.1		0.90588
				30.2		0.906658
				30.3		0.906771
				30.4		0.90682
				30.5		0.906722
				30.6		0.906504
				30.7		0.906185
				30.8		0.906055
				30.9		0.905721
				31		0.905478
				31.1		0.9053
				31.2		0.905476
				31.3		0.906026
				31.4		0.90733
				31.5		0.90841
				31.6		0.909569
				31.7		0.910934
				31.8		0.912099
				31.9		0.913968
				32		0.915135
				32.1		0.915874
				32.2		0.916958
				32.3		0.918231
				32.4		0.919004
				32.5		0.920107
				32.6		0.920003
				32.7		0.921371
				32.8		0.921112
				32.9		0.920297
				33		0.920708
				33.1		0.921083
				33.2		0.921056
				33.3		0.9215
				33.4		0.921669
				33.5		0.921522
				33.6		0.921012
				33.7		0.921104
				33.8		0.920741
				33.9		0.92116
				34		0.919878
				34.1		0.919485
				34.2		0.919377
				34.3		0.919668
				34.4		0.919603
				34.5		0.920069
				34.6		0.920074
				34.7		0.919871
				34.8		0.919545
				34.9		0.918735
				35		0.918216
				35.1		0.917266
				35.2		0.915667
				35.3		0.914688
				35.4		0.913764
				35.5		0.91344
				35.6		0.912507
				35.7		0.911793
				35.8		0.911365
				35.9		0.910749
				36		0.909924
				36.1		0.909073
				36.2		0.907974
				36.3		0.907065
				36.4		0.906187
				36.5		0.906045
				36.6		0.905251
				36.7		0.904537
				36.8		0.903824
				36.9		0.90412
				37		0.904961
				37.1		0.905324
				37.2		0.905447
				37.3		0.905941
				37.4		0.906061
				37.5		0.906727
				37.6		0.906777
				37.7		0.906457
				37.8		0.906093
				37.9		0.905727
				38		0.905446
				38.1		0.904922
				38.2		0.904323
				38.3		0.903575
				38.4		0.90318
				38.5		0.903073
				38.6		0.902971
				38.7		0.902736
				38.8		0.902957
				38.9		0.902871
				39		0.902973
				39.1		0.902839
				39.2		0.902997
				39.3		0.903332
				39.4		0.903637
				39.5		0.903905
				39.6		0.903768
				39.7		0.903382
				39.8		0.90324
				39.9		0.902895
				40		0.902929
